# Supplementary material for: Transgenerational Epigenetic Programming of the Brain Transcriptome and Anxiety Behavior
Source: PubMed Central journal article supplement (PMC2581440; doi:10.1371/journal.pone.0003745), 2008-11-18
Supplement: pone.0003745.s003.pdf [file pone.0003745.s003.pdf]

**Table S1**  
**Transgenerational Male Whole Brain Regulated Genes**

**Apoptosis**

| Sample     | F3-Cont | F3-Vinc | Vin/Con     | Genbank  | Gene Title                                             |
|------------|---------|---------|-------------|----------|--------------------------------------------------------|
| Gene Symt  | Raw     | Raw     | Ratio       |          |                                                        |
| Aven_predi | 97      | 63      | <b>0.65</b> | AA899459 | apoptosis, caspase activation inhibitor (predicted)    |
| Pycard     | 43      | 81      | <b>1.88</b> | BI282953 | apoptosis-associated speck-like protein containing a C |
| Cflar      | 69      | 126     | <b>1.84</b> | AI578435 | CASP8 and FADD-like apoptosis regulator                |
| Casp1      | 43      | 108     | <b>2.52</b> | D85899   | caspase 1                                              |
| Higd1b_pre | 48      | 116     | <b>2.44</b> | AI576009 | HIG1 domain family, member 1B (predicted)              |
| Stk17b     | 171     | 276     | <b>1.62</b> | AI012590 | serine/threonine kinase 17b (apoptosis-inducing)       |

**Cell Cycle**

| Sample     | F3-Cont | F3-Vinc | Vin/Con     | Genbank  | Gene Title                                                      |
|------------|---------|---------|-------------|----------|-----------------------------------------------------------------|
| Gene Symt  | Raw     | Raw     | Ratio       |          |                                                                 |
| Arrdc3     | 163     | 339     | <b>2.07</b> | AA818910 | Arrestin domain containing 3                                    |
| Cdc14a_pre | 42      | 78      | <b>1.86</b> | AW915083 | CDC14 cell division cycle 14 homolog A ( <i>S. cerevisiae</i> ) |
| Cdc73      | 168     | 285     | <b>1.70</b> | BI290578 | Cell division cycle 73, Paf1/RNA polymerase II complex          |
| Ccnd1      | 70      | 191     | <b>2.75</b> | BI295861 | cyclin D1                                                       |
| Gadd45b_p  | 48      | 138     | <b>2.88</b> | BI287978 | growth arrest and DNA-damage-inducible 45 beta (pre             |
| Pak4_predi | 57      | 87      | <b>1.52</b> | BE098920 | P21 (CDKN1A)-activated kinase 4 (predicted)                     |

**Cytoskeleton-ECM**

| Sample      | F3-Cont | F3-Vinc | Vin/Con      | Genbank   | Gene Title                                              |
|-------------|---------|---------|--------------|-----------|---------------------------------------------------------|
| Gene Symt   | Raw     | Raw     | Ratio        |           |                                                         |
| Als2cr3     | 152     | 284     | <b>1.86</b>  | BG378620  | amyotrophic lateral sclerosis 2 (juvenile) chromosome 1 |
| Cdh1        | 15      | 121     | <b>7.96</b>  | NM_031334 | cadherin 1                                              |
| Cdh11       | 118     | 71      | <b>0.61</b>  | BF419584  | Cadherin 11                                             |
| Cdh5_predi  | 111     | 204     | <b>1.84</b>  | BE110616  | Cadherin 5 (predicted)                                  |
| Cldn5       | 412     | 690     | <b>1.68</b>  | BI281680  | claudin 5                                               |
| Col3a1      | 108     | 357     | <b>3.30</b>  | BI275716  | collagen, type III, alpha 1                             |
| Col4a5_pre  | 102     | 196     | <b>1.92</b>  | AA891834  | Collagen, type IV, alpha 5 (predicted)                  |
| Col5a2      | 134     | 231     | <b>1.73</b>  | AI179399  | collagen, type V, alpha 2                               |
| Coro1c_pre  | 45      | 80      | <b>1.78</b>  | BE108221  | coronin, actin binding protein 1C (predicted)           |
| Clec14a     | 10      | 134     | <b>12.99</b> | BI295930  | C-type lectin domain family 14, member a                |
| Dcn         | 95      | 180     | <b>1.90</b>  | BM390253  | decorin                                                 |
| Dsp         | 43      | 127     | <b>2.99</b>  | AW144509  | Desmoplakin (predicted)                                 |
| Dncl2b_pre  | 126     | 251     | <b>1.98</b>  | AI144946  | dynein, cytoplasmic, light chain 2B (predicted)         |
| DLP2        | 49      | 80      | <b>1.65</b>  | AI409460  | Dynein-like protein 2                                   |
| Eml1        | 273     | 458     | <b>1.68</b>  | BI289642  | Echinoderm microtubule associated protein like 1 (pred  |
| RGD:13032   | 125     | 217     | <b>1.73</b>  | BF285026  | endothelial cell adhesion molecule                      |
| Emp2        | 14      | 489     | <b>35.53</b> | AA818807  | epithelial membrane protein 2                           |
| Eva_predic  | 39      | 97      | <b>2.51</b>  | BI282616  | epithelial V-like antigen (predicted)                   |
| Xlkd1_pred  | 27      | 254     | <b>9.32</b>  | AI179260  | extra cellular link domain-containing 1 (predicted)     |
| Ecm1        | 58      | 169     | <b>2.92</b>  | AI407838  | extracellular matrix protein 1                          |
| Fgg         | 4       | 128     | <b>29.41</b> | NM_012559 | fibrinogen, gamma polypeptide                           |
| Fgl2        | 39      | 175     | <b>4.50</b>  | BG663284  | fibrinogen-like 2                                       |
| Fn1         | 147     | 303     | <b>2.07</b>  | AA893484  | fibronectin 1                                           |
| Flna_predic | 129     | 334     | <b>2.59</b>  | BI283060  | filamin, alpha (predicted)                              |
| Gsn         | 573     | 1281    | <b>2.24</b>  | BI285576  | gelsolin                                                |
| Icam1       | 12      | 419     | <b>35.37</b> | NM_012967 | intercellular adhesion molecule 1                       |
| Icam2       | 56      | 225     | <b>4.00</b>  | AI410467  | intercellular adhesion molecule 2                       |

|              |     |      |              |           |                                                         |
|--------------|-----|------|--------------|-----------|---------------------------------------------------------|
| F11r         | 93  | 288  | <b>3.10</b>  | NM_053796 | junctional adhesion molecule 1                          |
| Krt1-18      | 44  | 152  | <b>3.43</b>  | BI286012  | keratin complex 1, acidic, gene 18                      |
| Krt1-19      | 16  | 253  | <b>16.09</b> | BI279605  | keratin complex 1, acidic, gene 19                      |
| Krt2-7_prec  | 27  | 109  | <b>4.09</b>  | BI284344  | keratin complex 2, basic, gene 7 (predicted)            |
| Krt2-8       | 41  | 138  | <b>3.37</b>  | BF281337  | keratin complex 2, basic, gene 8                        |
| Lamc2        | 32  | 95   | <b>2.99</b>  | BM385282  | lamimin, gamma 2                                        |
| Lamb2        | 126 | 202  | <b>1.60</b>  | NM_012974 | laminin, beta 2                                         |
| Lamb3        | 45  | 105  | <b>2.33</b>  | BE101834  | Laminin, beta 3                                         |
| Lgals3       | 63  | 454  | <b>7.15</b>  | NM_031832 | lectin, galactose binding, soluble 3                    |
| Lgals3bp     | 82  | 151  | <b>1.83</b>  | AF065438  | lectin, galactoside-binding, soluble, 3 binding protein |
| Lmcd1_pre    | 52  | 83   | <b>1.58</b>  | AI602501  | LIM and cysteine-rich domains 1 (predicted)             |
| LMO7         | 352 | 968  | <b>2.75</b>  | AI598833  | LIM domain only protein 7                               |
| Lamp3_pre    | 8   | 568  | <b>70.52</b> | BF283924  | lysosomal-associated membrane protein 3 (predicted)     |
| Mgp          | 383 | 1179 | <b>3.08</b>  | NM_012862 | matrix Gla protein                                      |
| Mxra8        | 71  | 110  | <b>1.55</b>  | AA946351  | matrix-remodelling associated 8                         |
| Mfap5_prec   | 18  | 76   | <b>4.22</b>  | BI283094  | microfibrillar associated protein 5 (predicted)         |
| Mfap4_prec   | 22  | 479  | <b>21.84</b> | AI177059  | microfibrillar-associated protein 4 (predicted)         |
| Msn          | 151 | 738  | <b>4.88</b>  | BF281185  | moesin                                                  |
| Muc1         | 13  | 155  | <b>11.87</b> | BI274326  | mucin 1                                                 |
| Myh11        | 111 | 166  | <b>1.50</b>  | X16262    | myosin heavy chain 11                                   |
| Myh6         | 38  | 112  | <b>2.91</b>  | NM_017239 | myosin heavy chain, polypeptide 6                       |
| Myo1c        | 41  | 82   | <b>2.02</b>  | NM_023092 | myosin IC                                               |
| Mrlcb        | 323 | 874  | <b>2.71</b>  | X05566    | myosin regulatory light chain                           |
| Myo5c_pre    | 41  | 108  | <b>2.64</b>  | BM386808  | Myosin VC (predicted)                                   |
| Myh14_pre    | 201 | 346  | <b>1.72</b>  | AI578120  | myosin, heavy polypeptide 14 (predicted)                |
| Myh9         | 181 | 291  | <b>1.61</b>  | BM392410  | myosin, heavy polypeptide 9                             |
| Myl7_predic  | 8   | 100  | <b>13.31</b> | AA891242  | myosin, light polypeptide 7, regulatory (predicted)     |
| Myl9_predic  | 106 | 180  | <b>1.70</b>  | BI279044  | myosin, light polypeptide 9, regulatory (predicted)     |
| Mylk_predic  | 153 | 360  | <b>2.35</b>  | AI177055  | Myosin, light polypeptide kinase (predicted)            |
| Nid          | 99  | 155  | <b>1.57</b>  | AI235948  | nidogen (entactin)                                      |
| Ogn_predic   | 164 | 349  | <b>2.13</b>  | AA945955  | osteoglycin (predicted)                                 |
| Plunc        | 8   | 377  | <b>44.83</b> | BF546645  | palate, lung, and nasal epithelium expressed transcript |
| Pdlim1       | 50  | 139  | <b>2.78</b>  | NM_017365 | PDZ and LIM domain protein 1 (Elfin) (LIM domain prot   |
| Col4a1_pre   | 85  | 187  | <b>2.20</b>  | AI176393  | procollagen, type IV, alpha 1 (predicted)               |
| Col6a1_pre   | 59  | 100  | <b>1.68</b>  | AI598402  | procollagen, type VI, alpha 1 (predicted)               |
| Col6a3_pre   | 55  | 109  | <b>2.00</b>  | AI176126  | procollagen, type VI, alpha 3 (predicted)               |
| Col12a1      | 48  | 78   | <b>1.63</b>  | BE108345  | procollagen, type XII, alpha 1                          |
| Pgsg         | 298 | 475  | <b>1.60</b>  | NM_020074 | proteoglycan peptide core protein                       |
| Plp2         | 55  | 194  | <b>3.54</b>  | BM385031  | proteolipid protein 2                                   |
| LOC315955    | 25  | 546  | <b>22.22</b> | BF290699  | Similar to claudin-18A1.2                               |
| Lrp16        | 154 | 93   | <b>0.60</b>  | AW524615  | Similar to fibronectin leucine rich transmembrane prote |
| RGD15631     | 104 | 582  | <b>5.58</b>  | AI237685  | Similar to osteoclast inhibitory lectin                 |
| MGC10951     | 24  | 101  | <b>4.18</b>  | AA012755  | similar to tropomyosin 1, embryonic fibroblast - rat    |
| Stom_predi   | 33  | 102  | <b>3.14</b>  | BI295949  | stomatin (predicted)                                    |
| Svil_predict | 94  | 170  | <b>1.81</b>  | AI045848  | supervillin (predicted)                                 |
| Sdc1         | 108 | 179  | <b>1.66</b>  | NM_013026 | syndecan 1                                              |
| Tln_predict  | 110 | 194  | <b>1.77</b>  | BI283756  | talin (predicted)                                       |
| Thbd         | 41  | 411  | <b>10.12</b> | AA818521  | thrombomodulin                                          |
| Tagln        | 43  | 151  | <b>3.53</b>  | NM_031549 | transgelin                                              |
| Tmod3        | 127 | 232  | <b>1.83</b>  | BG378269  | tropomodulin 3                                          |
| Tpm1         | 287 | 437  | <b>1.52</b>  | M23764    | tropomyosin 1, alpha                                    |
| Tpm4         | 211 | 553  | <b>2.61</b>  | BI281955  | Tropomyosin 4                                           |
| Tnnt2        | 23  | 86   | <b>3.74</b>  | NM_012676 | troponin T2                                             |

|               |     |     |             |           |                         |
|---------------|-----|-----|-------------|-----------|-------------------------|
| Vil2          | 220 | 395 | <b>1.80</b> | AA851304  | villin 2                |
| Vill_predicte | 96  | 145 | <b>1.51</b> | BE099937  | villin-like (predicted) |
| Vim           | 454 | 881 | <b>1.94</b> | NM_031140 | vimentin                |

### Development

| Sample       | F3-Cont | F3-Vinc | Vin/Con      | Genbank   | Gene Title                                               |
|--------------|---------|---------|--------------|-----------|----------------------------------------------------------|
| Gene Symt    | Raw     | Raw     | Ratio        |           |                                                          |
| Adfp         | 42      | 85      | <b>2.03</b>  | BG673602  | Adipose differentiation related protein                  |
| ADRP         | 54      | 138     | <b>2.55</b>  | BI285616  | adipose differentiation-related protein                  |
| Jub          | 33      | 87      | <b>2.64</b>  | BI284400  | ajuba homolog (Xenopus laevis)                           |
| Amotl2       | 161     | 275     | <b>1.71</b>  | BF418582  | Angiomotin like 2                                        |
| Amotl1_pre   | 152     | 239     | <b>1.57</b>  | BI277433  | Angiomotin-like 1 (predicted)                            |
| Angpt1       | 43      | 88      | <b>2.03</b>  | AI639162  | angiopoietin 1                                           |
| Ace          | 24      | 167     | <b>7.00</b>  | AA926148  | angiotensin 1 converting enzyme 1                        |
| Apeg1        | 152     | 101     | <b>0.67</b>  | AI072733  | Aortic preferentially expressed gene 1                   |
| Bk           | 75      | 35      | <b>0.47</b>  | U30831    | Brain and kidney protein                                 |
| Crygs_pred   | 123     | 45      | <b>0.37</b>  | AI408238  | crystallin, gamma S (predicted)                          |
| Dpt_predict  | 36      | 252     | <b>6.95</b>  | BI285485  | dermatopontin (predicted)                                |
| Evi1_predic  | 64      | 168     | <b>2.61</b>  | BE107033  | ecotropic viral integration site 1 (predicted)           |
| Elav1_prec   | 123     | 188     | <b>1.53</b>  | BF559812  | ELAV (embryonic lethal, abnormal vision, Drosophila)-li  |
| Emcn         | 64      | 159     | <b>2.49</b>  | AI172271  | endomucin                                                |
| Emp1         | 32      | 77      | <b>2.42</b>  | BI275741  | epithelial membrane protein 1                            |
| Fbn1         | 62      | 96      | <b>1.54</b>  | BM389019  | fibrillin-1                                              |
| Fhl1         | 78      | 119     | <b>1.52</b>  | BI298356  | four and a half LIM domains 1                            |
| Glpr1_prec   | 39      | 105     | <b>2.65</b>  | BF287967  | GLI pathogenesis-related 1 (glioma) (predicted)          |
| Gmfg         | 78      | 192     | <b>2.46</b>  | BG666787  | glia maturation factor, gamma                            |
| Gpnmb        | 76      | 382     | <b>5.02</b>  | NM_133298 | glycoprotein (transmembrane) nmb                         |
| Gp38         | 147     | 701     | <b>4.76</b>  | NM_019358 | glycoprotein 38                                          |
| Gpc3         | 45      | 118     | <b>2.62</b>  | NM_012774 | Glypican 3                                               |
| Heca_predi   | 70      | 125     | <b>1.79</b>  | BM390524  | Headcase homolog (Drosophila) (predicted)                |
| IAG2         | 117     | 223     | <b>1.90</b>  | AI575519  | implantation-associated protein                          |
| lrx1_predici | 55      | 184     | <b>3.35</b>  | BF543574  | Iroquois related homeobox 1 (Drosophila) (predicted) //  |
| lrx3_predici | 55      | 128     | <b>2.32</b>  | AI030203  | Iroquois related homeobox 3 (Drosophila) (predicted)     |
| Kirrel3_pre  | 193     | 106     | <b>0.55</b>  | BF402633  | Kin of IRRE like 3 (Drosophila) (predicted)              |
| Mvp          | 75      | 132     | <b>1.75</b>  | NM_022715 | major vault protein                                      |
| Mog          | 71      | 122     | <b>1.72</b>  | BF410306  | myelin oligodendrocyte glycoprotein                      |
| Mcl1         | 182     | 302     | <b>1.66</b>  | AI172056  | myeloid cell leukemia sequence 1                         |
| Myadm        | 137     | 222     | <b>1.62</b>  | BI296048  | myeloid-associated differentiation marker                |
| Nedd9        | 115     | 267     | <b>2.32</b>  | BM392374  | neural precursor cell expressed, developmentally down    |
| Nedd9_pre    | 27      | 91      | <b>3.39</b>  | BF555968  | neural precursor cell expressed, developmentally down    |
| Net1         | 125     | 229     | <b>1.83</b>  | AI180187  | Neuroepithelial cell transforming gene 1                 |
| Nrp1         | 149     | 359     | <b>2.41</b>  | AF016296  | neuropilin 1                                             |
| Npc2         | 898     | 1716    | <b>1.91</b>  | BI287960  | Niemann Pick type C2                                     |
| Odz2 /// LO  | 168     | 111     | <b>0.66</b>  | NM_020088 | odd Oz/ten-m homolog 2 (Drosophila) /// hypothetical g   |
| Pard6b_pre   | 50      | 115     | <b>2.32</b>  | BF525012  | par-6 (partitioning defective 6) homolog beta (C. elegar |
| Prx          | 13      | 96      | <b>7.49</b>  | NM_023976 | periaxin                                                 |
| Postn_pred   | 19      | 260     | <b>13.57</b> | BM389026  | periostin, osteoblast specific factor (predicted)        |
| Pmp22        | 452     | 839     | <b>1.86</b>  | AA943163  | peripheral myelin protein 22                             |
| Plac8_pred   | 52      | 217     | <b>4.17</b>  | BG378630  | placenta-specific 8 (predicted)                          |
| Plac9_pred   | 61      | 152     | <b>2.48</b>  | BI276313  | placenta-specific 9 (predicted)                          |
| Pivap        | 87      | 523     | <b>5.99</b>  | NM_020086 | plasmalemma vesicle associated protein                   |
| Prg-2        | 136     | 88      | <b>0.65</b>  | AI711557  | plasticity-related protein PRG-2                         |
| Retnla       | 41      | 198     | <b>4.80</b>  | NM_053333 | resistin like alpha                                      |

|            |     |      |               |           |                                                    |
|------------|-----|------|---------------|-----------|----------------------------------------------------|
| S100a10    | 252 | 445  | <b>1.77</b>   | NM_031114 | S-100 related protein, clone 42C                   |
| Spa17      | 67  | 113  | <b>1.68</b>   | NM_053482 | sperm autoantigenic protein 17                     |
| Sox17_prec | 79  | 138  | <b>1.75</b>   | AI031004  | SRY-box containing gene 17 (predicted)             |
| Sox18      | 56  | 100  | <b>1.78</b>   | AW528157  | SRY-box containing gene 18                         |
| Sox4_predi | 140 | 234  | <b>1.68</b>   | AA956294  | SRY-box containing gene 4 (predicted)              |
| Sftpc      | 18  | 5858 | <b>321.89</b> | AI009659  | surfactant associated protein C                    |
| Sftpa1     | 7   | 745  | <b>111.13</b> | NM_017329 | surfactant, pulmonary-associated protein A1        |
| Sftpb      | 5   | 1190 | <b>255.87</b> | X14778    | surfactant, pulmonary-associated protein B         |
| Syn3       | 535 | 854  | <b>1.60</b>   | AI599265  | Synapsin III                                       |
| Syng2      | 75  | 114  | <b>1.52</b>   | BF285314  | synaptogyrin 2                                     |
| Vamp8      | 106 | 316  | <b>2.98</b>   | NM_031827 | vesicle-associated membrane protein 8 (endobrevin) |

### Electron Transport

| Sample     | F3-Cont | F3-Vinc | Vin/Con      | Genbank   | Gene Title                                            |
|------------|---------|---------|--------------|-----------|-------------------------------------------------------|
| Gene Symt  | Raw     | Raw     | Ratio        |           |                                                       |
| Cybrd1_pre | 33      | 95      | <b>2.91</b>  | BF419070  | cytochrome b reductase 1 (predicted)                  |
| Cybas3     | 43      | 77      | <b>1.80</b>  | AI179227  | Cytochrome b, ascorbate dependent 3                   |
| Cyb5r3     | 217     | 354     | <b>1.63</b>  | J03867    | Cytochrome b5 reductase 3                             |
| Cyp2b2     | 14      | 635     | <b>45.67</b> | AI454613  | Cytochrome P450, family 2, subfamily b, polypeptide 2 |
| Cyp2f2     | 23      | 93      | <b>4.12</b>  | NM_019303 | cytochrome P450, family 2, subfamily f, polypeptide 2 |
| Cyp4b1     | 18      | 526     | <b>29.37</b> | M29853    | cytochrome P450, subfamily 4B, polypeptide 1          |
| Glrx2      | 152     | 247     | <b>1.62</b>  | BG671304  | Glutaredoxin 2 (thioltransferase) (predicted)         |
| Gpx1       | 787     | 1182    | <b>1.50</b>  | S41066    | glutathione peroxidase 1                              |
| Gpx2       | 10      | 202     | <b>20.33</b> | AA800587  | glutathione peroxidase 2                              |
| Gpx3       | 118     | 569     | <b>4.80</b>  | NM_022525 | glutathione peroxidase 3                              |
| Prdx6      | 42      | 130     | <b>3.06</b>  | BF398290  | Peroxiredoxin 6                                       |

### Growth Factors, Cyto-, Chemokines

| Sample     | F3-Cont | F3-Vinc | Vin/Con       | Genbank   | Gene Title                                       |
|------------|---------|---------|---------------|-----------|--------------------------------------------------|
| Gene Symt  | Raw     | Raw     | Ratio         |           |                                                  |
| Bmp4       | 40      | 106     | <b>2.62</b>   | NM_012827 | bone morphogenetic protein 4                     |
| Ccl5       | 46      | 153     | <b>3.36</b>   | NM_031116 | chemokine (C-C motif) ligand 5                   |
| Ccl6       | 2       | 467     | <b>217.16</b> | BE095824  | chemokine (C-C motif) ligand 6                   |
| Cxcl4      | 88      | 313     | <b>3.56</b>   | AI169104  | Chemokine (C-X-C motif) ligand 4                 |
| Cxcr4      | 46      | 94      | <b>2.05</b>   | AA945737  | Chemokine receptor (LCR1)                        |
| Cklfsf6    | 77      | 170     | <b>2.22</b>   | AI406687  | Chemokine-like factor super family 6 (predicted) |
| F3         | 144     | 222     | <b>1.54</b>   | NM_013057 | coagulation factor 3                             |
| Ctgf       | 177     | 453     | <b>2.56</b>   | NM_022266 | connective tissue growth factor                  |
| Egfl7      | 73      | 177     | <b>2.42</b>   | AF223678  | EGF-like domain 7                                |
| Eps8l2_pre | 112     | 199     | <b>1.77</b>   | BI285918  | EPS8-like 2 (predicted)                          |
| Fgf1       | 86      | 132     | <b>1.53</b>   | BI289840  | fibroblast growth factor 1                       |
| Igf1       | 94      | 180     | <b>1.92</b>   | M15481    | insulin-like growth factor 1                     |
| Il18       | 64      | 147     | <b>2.29</b>   | AJ222813  | interleukin 18                                   |
| Ogn_predic | 55      | 100     | <b>1.82</b>   | AA945955  | osteoglycin (predicted)                          |
| Pdgfa      | 41      | 83      | <b>2.05</b>   | AA866419  | platelet derived growth factor, alpha            |
| Scgb3a1    | 3       | 468     | <b>180.13</b> | AI011836  | secretoglobin, family 3A, member 1               |
| Cxcl16     | 53      | 134     | <b>2.54</b>   | BI296385  | similar to chemokine (C-X-C motif) ligand 16     |
| Vegf       | 324     | 563     | <b>1.74</b>   | AI175732  | vascular endothelial growth factor               |
| Wfdc1      | 85      | 130     | <b>1.53</b>   | BI279661  | wap four-disulfide core domain 1                 |

### Golgi Apparatus

| Sample    | F3-Cont | F3-Vinc | Vin/Con | Genbank | Gene Title |
|-----------|---------|---------|---------|---------|------------|
| Gene Symt | Raw     | Raw     | Ratio   |         |            |

|              |     |     |             |          |                                                         |
|--------------|-----|-----|-------------|----------|---------------------------------------------------------|
| Gla          | 123 | 77  | <b>0.62</b> | BM385090 | galactosidase, alpha                                    |
| Gcnt2 /// LC | 93  | 143 | <b>1.54</b> | AI234819 | glucosaminyl (N-acetyl) transferase 2, l-branching enzy |
| Hs2st1_pre   | 105 | 68  | <b>0.65</b> | AW530083 | heparan sulfate 2-O-sulfotransferase 1 (predicted)      |
| Man2a1       | 84  | 184 | <b>2.19</b> | AI178793 | Mannosidase 2, alpha 1                                  |
| Pomt2        | 55  | 91  | <b>1.65</b> | AI180194 | Protein-O-mannosyltransferase 2                         |
| RGD15636     | 100 | 231 | <b>2.30</b> | BF410842 | Similar to chondroitin sulfate GalNAcT-2 (predicted)    |
| LOC69048!    | 43  | 118 | <b>2.77</b> | AA944162 | Similar to cis-Golgi matrix protein GM130               |
| RGD15662     | 571 | 33  | <b>0.06</b> | AT005664 | similar to Coatomer gamma-2 subunit (Gamma-2 coat       |
| St3gal4      | 51  | 97  | <b>1.91</b> | BI295550 | ST3 beta-galactoside alpha-2,3-sialyltransferase 4      |
| B4galt1_ma   | 52  | 85  | <b>1.63</b> | BF282414 | UDP-Gal:betaGlcNAc beta 1,4-galactosyltransferase, p    |

### Immune Response

| Sample       | F3-Cont | F3-Vinc | Vin/Con       | Genbank   | Gene Title                                                  |
|--------------|---------|---------|---------------|-----------|-------------------------------------------------------------|
| Gene Symt    | Raw     | Raw     | <b>Ratio</b>  | Genbank   | Gene Title                                                  |
| B2m          | 2504    | 3766    | <b>1.50</b>   | NM_012512 | beta-2 microglobulin                                        |
| Cd36         | 31      | 301     | <b>9.70</b>   | NM_031561 | Cd36 antigen                                                |
| Cd36 /// LO  | 11      | 89      | <b>8.34</b>   | AF072411  | cd36 antigen /// similar to fatty acid translocase/CD36     |
| Cd44         | 49      | 137     | <b>2.80</b>   | BI302830  | CD44 antigen                                                |
| Cd48         | 129     | 272     | <b>2.11</b>   | X13016    | CD48 antigen                                                |
| Cd53         | 103     | 195     | <b>1.90</b>   | NM_012523 | CD53 antigen                                                |
| Cd68_predi   | 17      | 92      | <b>5.45</b>   | AI177761  | CD68 antigen (predicted)                                    |
| Cd74         | 158     | 939     | <b>5.96</b>   | NM_013069 | CD74 antigen (invariant polypeptide of major histocon       |
| Cd9          | 410     | 677     | <b>1.65</b>   | AI227627  | CD9 antigen                                                 |
| Cd97_predi   | 38      | 182     | <b>4.83</b>   | BI296525  | CD97 antigen (predicted)                                    |
| Cd99         | 103     | 201     | <b>1.96</b>   | AI235284  | CD99 antigen                                                |
| HA11_RAT     | 192     | 569     | <b>2.97</b>   | M24024    | Class I histocompatibility antigen, Non-RT1.A alpha-1 c     |
| ---          | 18      | 936     | <b>52.27</b>  | U07886    | Polymeric immunoglobulin receptor AATTA-containing          |
| F2r          | 185     | 363     | <b>1.97</b>   | NM_012950 | coagulation factor II receptor                              |
| C1s          | 62      | 121     | <b>1.95</b>   | D88250    | complement component 1, s subcomponent                      |
| C2           | 51      | 109     | <b>2.11</b>   | AI716125  | Complement component 2                                      |
| C3           | 175     | 316     | <b>1.81</b>   | NM_016994 | complement component 3                                      |
| C4a /// C4-  | 85      | 334     | <b>3.92</b>   | BI285347  | complement component 4a /// complement component            |
| C7           | 82      | 355     | <b>4.33</b>   | BF284922  | Complement component 7                                      |
| Crry         | 175     | 325     | <b>1.86</b>   | D42115    | complement receptor related protein                         |
| Fcgr3        | 143     | 360     | <b>2.51</b>   | NM_053843 | Fc gamma receptor II beta                                   |
| Fcgr3 /// LC | 137     | 380     | <b>2.78</b>   | NM_053843 | Fc receptor, IgG, low affinity III /// Fc gamma receptor II |
| IgG-2a /// L | 23      | 300     | <b>12.99</b>  | L22654    | gamma-2a immunoglobulin heavy chain /// similar to ga       |
| LOC28716!    | 401     | 839     | <b>2.09</b>   | AI237401  | globin, alpha                                               |
| Gbp2         | 41      | 96      | <b>2.34</b>   | NM_133624 | guanylate binding protein 2, interferon-inducible           |
| LOC68032!    | 7       | 441     | <b>65.36</b>  | BG374683  | Ig active lambda2-like chain mRNA, 3' end                   |
| Igha         | 42      | 749     | <b>17.82</b>  | AI412189  | immunoglobulin heavy chain (alpha polypeptide)              |
| Igh-1a_pre   | 5       | 568     | <b>107.15</b> | AI411947  | immunoglobulin heavy chain 1a (serum IgG2a) (predict        |
| Igj_predicte | 22      | 285     | <b>13.16</b>  | AA817898  | immunoglobulin joining chain (predicted)                    |
| Ifnar1_pred  | 57      | 86      | <b>1.51</b>   | AA799711  | interferon (alpha and beta) receptor 1 (predicted)          |
| Ifi30_predic | 122     | 194     | <b>1.60</b>   | BM389261  | interferon gamma inducible protein 30 (predicted)           |
| Ifitm1_pred  | 68      | 202     | <b>2.99</b>   | BG380285  | interferon induced transmembrane protein 1 (predicted       |
| Ifitm2       | 104     | 233     | <b>2.24</b>   | NM_030833 | interferon induced transmembrane protein 2 (1-8D)           |
| Irf2_predict | 50      | 77      | <b>1.53</b>   | BI302791  | interferon regulatory factor 2 (predicted)                  |
| Ifit2        | 44      | 86      | <b>1.96</b>   | BE118697  | interferon-induced protein with tetratricopeptide repeats   |
| Ly6b         | 10      | 333     | <b>34.47</b>  | M30689    | Ly6-B antigen gene                                          |
| Ly6c         | 50      | 214     | <b>4.24</b>   | NM_020103 | Ly6-C antigen                                               |
| C1qr1        | 49      | 163     | <b>3.31</b>   | BI282932  | Lymphocyte antigen 68                                       |
| RT1-CE12     | 130     | 262     | <b>2.02</b>   | M24026    | RT1 class I, CE12                                           |

|             |     |      |               |          |                                                             |
|-------------|-----|------|---------------|----------|-------------------------------------------------------------|
| RT1-Aw2     | 170 | 370  | <b>2.17</b>   | AI012221 | RT1 class Ib, locus Aw2                                     |
| RT1-Aw2 /// | 96  | 329  | <b>3.45</b>   | BI282965 | RT1 class Ib, locus Aw2 /// RT1 class I, CE12 /// RT1 cl    |
| RT1-Aw2 /// | 215 | 463  | <b>2.15</b>   | AJ249701 | RT1 class Ib, locus Aw2 /// RT1 class Ia, locus A2 /// RT   |
| RT1-S3      | 56  | 153  | <b>2.76</b>   | AJ243974 | RT1 class Ib, locus S3                                      |
| RT1-Ba      | 20  | 181  | <b>9.04</b>   | BG378249 | RT1 class II, locus Ba                                      |
| RT1-Da      | 93  | 583  | <b>6.25</b>   | Y00480   | RT1 class II, locus Da                                      |
| RT1-Db1     | 19  | 137  | <b>7.21</b>   | BI279526 | RT1 class II, locus Db1                                     |
| LOC498989   | 61  | 98   | <b>1.62</b>   | BG664827 | similar to Ab2-143                                          |
| LOC680404   | 321 | 208  | <b>0.65</b>   | BG374818 | Similar to Complement C1q-like protein 3 precursor (GI      |
| LOC500180   | 6   | 2341 | <b>368.59</b> | L22655   | similar to IG KAPPA CHAIN V-V REGION K2 PRECUR              |
| LOC299357   | 33  | 115  | <b>3.50</b>   | AI411693 | similar to Igh-6 protein /// similar to Ig H-chain V-region |
| LOC498022   | 26  | 105  | <b>4.12</b>   | BF387360 | similar to immunoglobulin superfamily, member 7             |
| LOC686326   | 43  | 98   | <b>2.27</b>   | BI294409 | similar to Interferon-alpha/beta receptor beta chain pre    |
| LOC314509   | 28  | 87   | <b>3.11</b>   | AA996557 | similar to single chain Fv antibody fragment scFv 7-10A     |
| RGD15634    | 207 | 395  | <b>1.91</b>   | BM391860 | Similar to T-cell activation leucine repeat-rich protein (p |
| Tiam1_prec  | 75  | 42   | <b>0.56</b>   | BM389265 | T-cell lymphoma invasion and metastasis 1 (predicted)       |
| Thbd        | 13  | 103  | <b>7.77</b>   | BG666306 | thrombomodulin                                              |

### Metabolism & Transport

| Sample       | F3-Cont | F3-Vinc | Vin/Con       | Genbank   | Gene Title                                              |
|--------------|---------|---------|---------------|-----------|---------------------------------------------------------|
| Gene Synt    | Raw     | Raw     | <b>Ratio</b>  | Genbank   | Gene Title                                              |
| Acsf5        | 175     | 282     | <b>1.61</b>   | NM_053607 | acyl-CoA synthetase long-chain family member 5          |
| Aytl2_predi  | 186     | 429     | <b>2.31</b>   | BG380281  | Acyltransferase like 2 (predicted)                      |
| Arf4l_predic | 30      | 89      | <b>2.95</b>   | AI030650  | ADP-ribosylation factor 4-like (predicted)              |
| Aldh2        | 195     | 327     | <b>1.68</b>   | NM_032416 | aldehyde dehydrogenase 2                                |
| Aldh1a1      | 286     | 631     | <b>2.21</b>   | NM_022407 | aldehyde dehydrogenase family 1, member A1              |
| Aldh9a1      | 200     | 329     | <b>1.65</b>   | BI294750  | Aldehyde dehydrogenase family 9, subfamily A1           |
| Akr1c11_pre  | 45      | 262     | <b>5.83</b>   | AW522526  | aldo-keto reductase family 1, member C-like 1 (predicte |
| Accn1        | 78      | 45      | <b>0.58</b>   | Y14635    | amiloride-sensitive cation channel 1                    |
| Aoc3         | 11      | 187     | <b>17.11</b>  | AI070137  | amine oxidase, copper containing 3                      |
| Alas2        | 159     | 244     | <b>1.53</b>   | NM_013197 | aminolevulinic acid synthase 2                          |
| Ace          | 75      | 259     | <b>3.45</b>   | AF201331  | angiotensin 1 converting enzyme 1                       |
| Aqp1         | 30      | 171     | <b>5.78</b>   | AA891661  | aquaporin 1                                             |
| Aqp5         | 35      | 232     | <b>6.67</b>   | NM_012779 | aquaporin 5                                             |
| Atp6v1c2     | 13      | 185     | <b>14.15</b>  | BF283053  | ATPase, H+ transporting, V1 subunit C, isoform 2        |
| Ca3          | 46      | 114     | <b>2.49</b>   | AB030829  | carbonic anhydrase 3                                    |
| Ces3         | 17      | 543     | <b>32.31</b>  | L46791    | carboxylesterase 3                                      |
| Comt         | 113     | 251     | <b>2.23</b>   | NM_012531 | catechol-O-methyltransferase                            |
| Chia         | 1       | 210     | <b>167.76</b> | AI639227  | chitinase, acidic                                       |
| Clic2_predi  | 28      | 95      | <b>3.33</b>   | BI293548  | chloride intracellular channel 2 (predicted)            |
| Clic3_predi  | 4       | 169     | <b>42.18</b>  | AI234249  | chloride intracellular channel 3 (predicted)            |
| Colec12      | 114     | 182     | <b>1.60</b>   | BI284441  | collectin sub-family member 12                          |
| Cngb1        | 77      | 24      | <b>0.31</b>   | AJ224680  | cyclic nucleotide-gated channel beta subunit 1          |
| RGD:13029    | 551     | 898     | <b>1.63</b>   | NM_022501 | cysteine-rich protein 2                                 |
| Cyp27a1      | 40      | 111     | <b>2.75</b>   | M73231    | cytochrome P450, family 27, subfamily a, polypeptide 1  |
| Dguok_pre    | 82      | 52      | <b>0.64</b>   | BF285179  | deoxyguanosine kinase (predicted)                       |
| Dpysl4       | 308     | 204     | <b>0.66</b>   | BF413467  | dihydropyrimidinase-like 4                              |
| Acbd3        | 88      | 57      | <b>0.65</b>   | BF419134  | DMT1-associated protein                                 |
| Cybb         | 13      | 75      | <b>5.64</b>   | AI176057  | endothelial type gp91-phox gene                         |
| Ephx1        | 105     | 167     | <b>1.58</b>   | NM_012844 | epoxide hydrolase 1                                     |
| Ftl1         | 1000    | 1596    | <b>1.60</b>   | L01122    | ferritin light chain 1                                  |
| Fmo1         | 59      | 296     | <b>5.05</b>   | NM_012792 | flavin containing monooxygenase 1                       |
| Fmo2         | 13      | 117     | <b>8.73</b>   | BM389350  | flavin containing monooxygenase 2                       |

|             |     |      |        |                 |                                                                     |
|-------------|-----|------|--------|-----------------|---------------------------------------------------------------------|
| Galm        | 91  | 165  | 1.81   | AA997048        | galactose mutarotase (aldose 1-epimerase)                           |
| Gja4        | 25  | 81   | 3.25   | NM_021654       | gap junction membrane channel protein alpha 4                       |
| Gja5        | 38  | 87   | 2.29   | NM_019280       | gap junction membrane channel protein alpha 5                       |
| Gpt2_predi  | 110 | 57   | 0.52   | AA955605        | Glutamic pyruvate transaminase (alanine aminotransferase)           |
| Gstm2       | 33  | 100  | 3.06   | AI169331        | glutathione S-transferase, mu 2                                     |
| Gpd1        | 79  | 193  | 2.46   | BF399697        | Glycerol-3-phosphate dehydrogenase 1 (soluble)                      |
| Gpd2        | 137 | 60   | 0.44   | U08027          | glycerol-3-phosphate dehydrogenase 2                                |
| Gypc_predi  | 57  | 107  | 1.89   | AA944212        | glycophorin C (Gerbich blood group) (predicted) /// similar         |
| Ggta1       | 60  | 118  | 1.95   | AI178222        | Glycoprotein galactosyltransferase alpha 1, 3                       |
| Gimap5      | 19  | 86   | 4.46   | BI294743        | GTPase, IMAP family member 5                                        |
| Gmps_prec   | 66  | 110  | 1.67   | BI283031        | guanine monophosphate synthetase (predicted)                        |
| Hk1         | 104 | 58   | 0.55   | _Rat_Hexokinase | hexokinase 1                                                        |
| Hsd11b1     | 360 | 540  | 1.50   | NM_017080       | hydroxysteroid 11-beta dehydrogenase 1                              |
| Ltbp1       | 33  | 89   | 2.71   | NM_021587       | LanC (bacterial lantibiotic synthetase component C)-like            |
| Lta4h       | 283 | 472  | 1.67   | AW918009        | Leukotriene A4 hydrolase                                            |
| Lpl         | 167 | 266  | 1.59   | NM_012598       | lipoprotein lipase                                                  |
| Lcp1_predi  | 151 | 333  | 2.20   | BE109711        | lymphocyte cytosolic protein 1 (predicted)                          |
| Lyz         | 521 | 5571 | 10.70  | L12458          | lysozyme                                                            |
| Loxl1_predi | 43  | 101  | 2.34   | AI599031        | lysyl oxidase-like 1 (predicted)                                    |
| Mettl7a     | 270 | 500  | 1.85   | AA946026        | Methyltransferase like 7A                                           |
| Mgst1       | 252 | 723  | 2.87   | NM_134349       | microsomal glutathione S-transferase 1                              |
| Mgst2_prec  | 38  | 130  | 3.45   | BI290559        | microsomal glutathione S-transferase 2 (predicted)                  |
| Mgl1        | 208 | 130  | 0.62   | AY081195        | monoglyceride lipase                                                |
| Gnptg       | 100 | 56   | 0.56   | AW522848        | N-acetylglucosamine-1-phosphotransferase, gamma subunit             |
| Asah1_pred  | 62  | 235  | 3.80   | AI412627        | N-acylsphingosine amidohydrolase (acid ceramidase)-like             |
| Asah3l_pre  | 65  | 149  | 2.27   | AI137826        | N-acylsphingosine amidohydrolase 3-like (predicted)                 |
| Pon3        | 33  | 355  | 10.65  | BM385409        | paraoxonase 3                                                       |
| Pnpla2_pre  | 84  | 132  | 1.57   | BI278288        | Patatin-like phospholipase domain containing 2 (predicted)          |
| Pi4k2b      | 44  | 121  | 2.77   | BM383435        | Phosphatidylinositol 4-kinase type-II beta                          |
| Pspla1      | 32  | 87   | 2.73   | D88666          | phosphatidylserine-specific phospholipase A1                        |
| Pik3ap1_pr  | 34  | 84   | 2.48   | AW916092        | phosphoinositide-3-kinase adaptor protein 1 (predicted)             |
| Pla2g1b     | 23  | 160  | 6.97   | AI234860        | phospholipase A2, group IB                                          |
| Pla2g2a     | 7   | 87   | 12.06  | NM_031598       | phospholipase A2, group IIA (platelets, synovial fluid)             |
| Pla2g2d     | 7   | 108  | 16.68  | AI044869        | phospholipase A2, group IID                                         |
| Plscr1      | 10  | 78   | 7.47   | NM_057194       | phospholipid scramblase 1                                           |
| Ppcdc_prec  | 81  | 39   | 0.48   | AI411422        | Phosphopantothienoylcysteine decarboxylase (predicted)              |
| Kcnk15      | 105 | 68   | 0.65   | BF405604        | potassium channel, subfamily K, member 15                           |
| Kcnj16      | 241 | 152  | 0.63   | AI411366        | potassium inwardly-rectifying channel, subfamily J, member 16       |
| Kcnma1      | 113 | 74   | 0.65   | BF386160        | potassium large conductance calcium-activated channel               |
| Selenbp1    | 54  | 175  | 3.26   | NM_080892       | selenium binding protein 2                                          |
| Shmt1_pre   | 60  | 106  | 1.77   | AI010087        | serine hydroxymethyl transferase 1 (soluble) (predicted)            |
| LOC500358   | 96  | 179  | 1.86   | BM391516        | similar to Deoxyribose-phosphate aldolase-like                      |
| LOC368066   | 45  | 182  | 4.03   | AI232716        | similar to thioether S-methyltransferase                            |
| LOC361871   | 89  | 55   | 0.62   | AW433978        | similar to Vacuolar ATP synthase subunit S1 precursor               |
| Scnn1a      | 13  | 84   | 6.50   | NM_031548       | sodium channel, nonvoltage-gated, type I, alpha polypeptide         |
| Scn7a       | 48  | 289  | 6.09   | BF285019        | sodium channel, voltage-gated, type 6, alpha polypeptide            |
| Slc13a5     | 105 | 66   | 0.63   | BG381311        | solute carrier family 13 (sodium-dependent citrate transporter)     |
| Slc25a24_pr | 49  | 106  | 2.18   | BM385894        | Solute carrier family 25 (mitochondrial carrier, phosphate carrier) |
| Slc29a1     | 56  | 183  | 3.25   | NM_031684       | solute carrier family 29, member 1                                  |
| Slc34a2     | 3   | 1161 | 368.63 | NM_053380       | solute carrier family 34 (sodium phosphate), member 2               |
| Slc39a4_pr  | 33  | 104  | 3.19   | AI556941        | solute carrier family 39 (zinc transporter), member 4 (platelet)    |
| Slc4a8      | 52  | 82   | 1.57   | BM385244        | solute carrier family 4 (anion exchanger), member 8                 |
| Slc44a2_pr  | 229 | 344  | 1.50   | AI408306        | Solute carrier family 44, member 2 (predicted)                      |

|             |     |     |              |           |                                                           |
|-------------|-----|-----|--------------|-----------|-----------------------------------------------------------|
| Slc9a3r2    | 89  | 155 | <b>1.75</b>  | BI277485  | solute carrier family 9 (sodium/hydrogen exchanger), is   |
| Slco2a1     | 7   | 240 | <b>35.00</b> | AI407489  | Solute carrier organic anion transporter family, member   |
| Scd2        | 127 | 62  | <b>0.49</b>  | BI850137  | stearoyl-Coenzyme A desaturase 2                          |
| Sqrdl       | 113 | 178 | <b>1.57</b>  | AI013361  | sulfide quinone reductase-like (yeast)                    |
| Sult1a1     | 159 | 362 | <b>2.27</b>  | AF394783  | sulfotransferase family 1A, phenol-preferring, member     |
| Syt4        | 403 | 236 | <b>0.59</b>  | L38247    | synaptotagmin 4                                           |
| Tpmt        | 101 | 165 | <b>1.63</b>  | AI638971  | thiopurine methyltransferase                              |
| Tgm2        | 112 | 321 | <b>2.87</b>  | NM_019386 | tissue-type transglutaminase                              |
| Tmc4_pred   | 70  | 149 | <b>2.14</b>  | AI556940  | transmembrane channel-like gene family 4 (predicted)      |
| Unc93b_pr   | 74  | 131 | <b>1.77</b>  | AI234533  | unc-93 homolog B (C. elegans) (predicted)                 |
| Vat1_predic | 77  | 117 | <b>1.52</b>  | BI284849  | vesicle amine transport protein 1 homolog (T californica) |
| Xdh         | 70  | 199 | <b>2.86</b>  | NM_017154 | xanthine dehydrogenase                                    |

### Proteolysis

| Sample     | F3-Cont | F3-Vinc | Vin/Con      | Genbank   | Gene Title                                                 |
|------------|---------|---------|--------------|-----------|------------------------------------------------------------|
| Gene Symt  | Raw     | Raw     | Ratio        |           |                                                            |
| Adam17     | 147     | 240     | <b>1.64</b>  | NM_020306 | a disintegrin and metalloproteinase domain 17              |
| Anpep      | 31      | 186     | <b>6.05</b>  | NM_031012 | alanyl (membrane) aminopeptidase                           |
| Ctsc       | 56      | 162     | <b>2.87</b>  | AI409046  | cathepsin C                                                |
| Ctsh       | 341     | 662     | <b>1.94</b>  | NM_012939 | cathepsin H                                                |
| Dpp4       | 20      | 106     | <b>5.36</b>  | J02997    | dipeptidylpeptidase 4                                      |
| Laptm5     | 69      | 165     | <b>2.38</b>  | BF406601  | lysosomal-associated protein transmembrane 5               |
| Napsa      | 3       | 221     | <b>67.09</b> | NM_031670 | napsin A aspartic peptidase                                |
| Osgepl1_pr | 94      | 61      | <b>0.65</b>  | BF393066  | O-sialoglycoprotein endopeptidase-like 1 (predicted)       |
| Psme1      | 287     | 460     | <b>1.60</b>  | NM_017264 | protease (prosome, macropain) 28 subunit, alpha            |
| Prss23     | 125     | 432     | <b>3.45</b>  | AI177099  | protease, serine, 23                                       |
| Psmb8      | 57      | 112     | <b>1.98</b>  | NM_080767 | proteasome (prosome, macropain) subunit, beta type 8       |
| Serping1   | 92      | 224     | <b>2.43</b>  | AW915763  | serine (or cysteine) peptidase inhibitor, clade G, memb    |
| Serpinb10  | 4       | 96      | <b>26.99</b> | BF399855  | serine (or cysteine) proteinase inhibitor, clade B (ovalbu |
| Serpinb6   | 96      | 223     | <b>2.33</b>  | AA997359  | serine (or cysteine) proteinase inhibitor, clade B (ovalbu |
| Serpinb1a_ | 80      | 210     | <b>2.62</b>  | BF411331  | serine (or cysteine) proteinase inhibitor, clade B, memb   |
| Serpinh1   | 118     | 201     | <b>1.71</b>  | BI285495  | serine (or cysteine) proteinase inhibitor, clade H, memb   |
| Spint2     | 175     | 370     | <b>2.11</b>  | AI412117  | serine protease inhibitor, Kunitz type 2                   |
| Siah1a     | 52      | 79      | <b>1.51</b>  | NM_080905 | seven in absentia 1A                                       |
| LOC49869(  | 27      | 87      | <b>3.21</b>  | AI230591  | similar to ctla-2-beta protein (141 AA)                    |
| Senp5_pre  | 137     | 210     | <b>1.53</b>  | BE105606  | SUMO/sentrin specific protease 5 (predicted) /// similar   |
| Timp1      | 39      | 77      | <b>1.95</b>  | NM_053819 | tissue inhibitor of metalloproteinase 1                    |
| Timp2      | 456     | 704     | <b>1.54</b>  | NM_021989 | tissue inhibitor of metalloproteinase 2                    |
| Timp3      | 221     | 386     | <b>1.75</b>  | AA893169  | tissue inhibitor of metalloproteinase 3 (Sorsby fundus d   |
| Ube3a_pre  | 61      | 96      | <b>1.56</b>  | BG376442  | ubiquitin protein ligase E3A (predicted)                   |
| Ube1dc1_p  | 103     | 190     | <b>1.85</b>  | AI408025  | ubiquitin-activating enzyme E1-domain containing 1 (pr     |

### Receptor & Binding Proteins

| Sample     | F3-Cont | F3-Vinc | Vin/Con      | Genbank   | Gene Title                                               |
|------------|---------|---------|--------------|-----------|----------------------------------------------------------|
| Gene Symt  | Raw     | Raw     | Ratio        |           |                                                          |
| Admr       | 15      | 86      | <b>5.69</b>  | BF551274  | adrenomedullin receptor                                  |
| Ager       | 32      | 882     | <b>27.90</b> | NM_053336 | advanced glycosylation end product-specific receptor     |
| Apbb1ip_pr | 79      | 126     | <b>1.60</b>  | BM386169  | amyloid beta (A4) precursor protein-binding, family B, n |
| Abca3      | 189     | 303     | <b>1.61</b>  | BE096678  | ATP-binding cassette, sub-family A (ABC1), member 3      |
| Abcc10_pre | 126     | 81      | <b>0.64</b>  | AI577346  | ATP-binding cassette, sub-family C (CFTR/MRP), mem       |
| Bzrp       | 90      | 196     | <b>2.19</b>  | AI008680  | benzodiazepin receptor                                   |
| Bmpr2      | 189     | 304     | <b>1.61</b>  | BF398206  | Bone morphogenic protein receptor, type II (serine/thre  |
| Calcl      | 108     | 703     | <b>6.53</b>  | AA945708  | calcitonin receptor-like                                 |



|              |     |      |               |                 |                                                             |
|--------------|-----|------|---------------|-----------------|-------------------------------------------------------------|
| Dlgap1       | 196 | 84   | <b>0.43</b>   | BF413506        | Discs, large (Drosophila) homolog-associated protein 1      |
| Dlgap1       | 464 | 275  | <b>0.59</b>   | BE116953        | Disks large-associated protein 1 (DAP-1) (Guanylate ki      |
| Eng          | 59  | 153  | <b>2.60</b>   | BF288089        | Endoglin                                                    |
| Edg5         | 25  | 79   | <b>3.17</b>   | NM_017192       | endothelial differentiation, sphingolipid G-protein-coupl   |
| Ednra        | 23  | 104  | <b>4.45</b>   | BF414702        | Endothelin receptor type A                                  |
| Epha8        | 113 | 73   | <b>0.64</b>   | C06786          | Eph receptor A8                                             |
| Esrrg        | 194 | 98   | <b>0.51</b>   | AA996810        | Estrogen-related receptor gamma                             |
| Fubp3        | 108 | 71   | <b>0.66</b>   | BF282112        | Far upstream element (FUSE) binding protein 3 (predic       |
| Grik2        | 148 | 70   | <b>0.48</b>   | AW527501        | Glutamate receptor, ionotropic, kainate 2                   |
| Igfbp7_prec  | 795 | 1454 | <b>1.83</b>   | AI233246        | insulin-like growth factor binding protein 7 (predicted)    |
| Il13ra1      | 60  | 106  | <b>1.76</b>   | BF282650        | interleukin 13 receptor, alpha 1                            |
| Il17r_predic | 75  | 122  | <b>1.63</b>   | BI279744        | interleukin 17 receptor (predicted)                         |
| Kdr          | 97  | 345  | <b>3.54</b>   | U93307          | kinase insert domain protein receptor                       |
| Ltbp4_pred   | 97  | 186  | <b>1.91</b>   | BG375362        | latent transforming growth factor beta binding protein 4    |
| Ltbr_predic  | 56  | 95   | <b>1.69</b>   | AI705656        | lymphotoxin B receptor (predicted)                          |
| Mrc1_predi   | 30  | 161  | <b>5.44</b>   | BI294018        | mannose receptor, C type 1 (predicted)                      |
| Mrvldc1_pr   | 52  | 179  | <b>3.42</b>   | AI176583        | MARVEL (membrane-associating) domain containing 1           |
| Nucb2        | 125 | 214  | <b>1.71</b>   | NM_021663       | NEFA precursor                                              |
| Nrp2         | 59  | 105  | <b>1.77</b>   | BM386520        | neuropilin 2                                                |
| Osbp1a       | 104 | 60   | <b>0.58</b>   | BM384713        | Oxysterol binding protein-like 1A                           |
| Osbp15_pre   | 94  | 153  | <b>1.62</b>   | BG372522        | oxysterol binding protein-like 5 (predicted)                |
| Pvrl3_predi  | 48  | 95   | <b>1.96</b>   | AW525315        | poliovirus receptor-related 3 (predicted)                   |
| Ptbp1        | 124 | 199  | <b>1.60</b>   | X60790          | polypyrimidine tract binding protein 1                      |
| Rbp1         | 76  | 124  | <b>1.62</b>   | NM_012733       | retinol binding protein 1                                   |
| S100a11      | 101 | 1257 | <b>12.49</b>  | BG378926        | S100 calcium binding protein A11 (calizzarin)               |
| S100a6       | 74  | 1215 | <b>16.37</b>  | AF140232        | S100 calcium binding protein A6 (calcyclin)                 |
| S100g        | 8   | 315  | <b>39.41</b>  | NM_012521       | S100 calcium binding protein G                              |
| S100a4       | 85  | 454  | <b>5.31</b>   | NM_012618       | S100 calcium-binding protein A4                             |
| S100a8       | 32  | 111  | <b>3.48</b>   | NM_053822       | S100 calcium-binding protein A8 (calgranulin A)             |
| S100a9       | 81  | 276  | <b>3.42</b>   | NM_053587       | S100 calcium-binding protein A9 (calgranulin B)             |
| Sec14I3      | 39  | 171  | <b>4.41</b>   | AA925062        | SEC14-like 3 ( <i>S. cerevisiae</i> )                       |
| Sec14I3      | 14  | 565  | <b>39.92</b>  | AJ132352        | SEC14-like protein 3 (45 kDa secretory protein) (rsec4)     |
| LOC305633    | 27  | 79   | <b>2.94</b>   | AI013888        | similar to Antxr2 [anthrax toxin receptor ] protein         |
| LOC287847    | 832 | 554  | <b>0.67</b>   | BG380409        | similar to ataxin 2-binding protein 1 isoform 2             |
| LOC498433    | 56  | 114  | <b>2.02</b>   | BM385804        | similar to ATP-binding cassette, subfamily G, member 3      |
| LOC690976    | 108 | 181  | <b>1.67</b>   | AI230762        | Similar to Calponin-2 (Calponin H2, smooth muscle) (N       |
| RGD15651     | 88  | 1111 | <b>12.70</b>  | AA817993        | Similar to dendritic cell-derived immunoglobulin(Ig)-like   |
| LOC296462    | 162 | 56   | <b>0.34</b>   | BI292232        | similar to GTP binding protein 5                            |
| LOC316130    | 59  | 99   | <b>1.69</b>   | BI281957        | similar to mannose-6-phosphate receptor binding prote       |
| Sftpd        | 21  | 625  | <b>30.13</b>  | NM_012878       | surfactant associated protein D                             |
| Sftpa1       | 18  | 1949 | <b>110.76</b> | BI295853        | surfactant, pulmonary-associated protein A1                 |
| Tax1bp3      | 85  | 179  | <b>2.12</b>   | BI274159        | Tax1 (human T-cell leukemia virus type I) binding prote     |
| Thra         | 115 | 71   | <b>0.62</b>   | M18028          | thyroid hormone receptor alpha                              |
| Trip10       | 53  | 80   | <b>1.50</b>   | NM_053920       | thyroid hormone receptor interactor 10                      |
| Tgfbr2       | 257 | 580  | <b>2.26</b>   | AI408571        | transforming growth factor, beta receptor II                |
| Tyrobp       | 72  | 143  | <b>1.97</b>   | AI102519        | Tyro protein tyrosine kinase binding protein                |
| Vipr1        | 64  | 479  | <b>7.54</b>   | BI301509        | vasoactive intestinal peptide receptor 1                    |
| LOC679357    | 179 | 277  | <b>1.55</b>   | <b>AI103026</b> | similar to interferon regulatory factor 2 binding protein 2 |

### Signaling

| Sample    | F3-Cont | F3-Vinc | Vin/Con     | Genbank  | Gene Title                        |
|-----------|---------|---------|-------------|----------|-----------------------------------|
| Gene Symt | Raw     | Raw     | Ratio       |          |                                   |
| Akap13    | 110     | 217     | <b>1.97</b> | AI599048 | A kinase (PRKA) anchor protein 13 |

|              |      |      |               |           |                                                         |
|--------------|------|------|---------------|-----------|---------------------------------------------------------|
| Akap2        | 44   | 81   | <b>1.86</b>   | BF398063  | A kinase (PRKA) anchor protein 2                        |
| Akap5        | 66   | 143  | <b>2.15</b>   | NM_133515 | A kinase (PRKA) anchor protein 5                        |
| Acvr1        | 30   | 170  | <b>5.64</b>   | NM_022441 | activin A receptor type II-like 1                       |
| Acvr1c       | 134  | 63   | <b>0.47</b>   | U35025    | activin receptor-like kinase 7                          |
| Arc          | 200  | 313  | <b>1.57</b>   | NM_019361 | activity regulated cytoskeletal-associated protein      |
| Enpep        | 27   | 108  | <b>4.04</b>   | AF214568  | aminopeptidase A                                        |
| Anxa1        | 78   | 778  | <b>9.91</b>   | NM_012904 | annexin 1                                               |
| Anxa5        | 329  | 633  | <b>1.92</b>   | NM_013132 | annexin 5                                               |
| Anxa2        | 197  | 557  | <b>2.83</b>   | NM_019905 | Annexin A2                                              |
| Anxa8_prec   | 34   | 355  | <b>10.33</b>  | BM389254  | annexin A8 (predicted)                                  |
| Alox5ap      | 24   | 85   | <b>3.46</b>   | NM_017260 | arachidonate 5-lipoxygenase activating protein          |
| Btg2         | 101  | 242  | <b>2.40</b>   | NM_017259 | B-cell translocation gene 2, anti-proliferative         |
| Bf           | 58   | 283  | <b>4.92</b>   | AI639117  | B-factor, properdin                                     |
| Bgn          | 103  | 216  | <b>2.10</b>   | NM_017087 | biglycan                                                |
| Bst2         | 73   | 329  | <b>4.54</b>   | BM385476  | bone marrow stromal cell antigen 2                      |
| Camk2d       | 88   | 53   | <b>0.60</b>   | NM_012519 | calcium/calmodulin-dependent protein kinase II, delta   |
| Crem         | 135  | 202  | <b>1.50</b>   | AW529408  | CAMP responsive element modulator                       |
| Csnk1g3      | 76   | 45   | <b>0.59</b>   | NM_022855 | casein kinase 1 gamma 3 isoform                         |
| Cav          | 158  | 947  | <b>6.01</b>   | BI285449  | Caveolin                                                |
| Cav2         | 167  | 631  | <b>3.77</b>   | BE349669  | caveolin 2                                              |
| Cdc42ep3_    | 138  | 231  | <b>1.67</b>   | AA874943  | CDC42 effector protein (Rho GTPase binding) 3 (predic   |
| Defb3        | 3    | 1034 | <b>382.91</b> | AF068861  | defensin beta 3                                         |
| Dab2         | 137  | 239  | <b>1.75</b>   | AI407821  | disabled homolog 2, mitogen-responsive phosphoprote     |
| Dusp1        | 367  | 770  | <b>2.10</b>   | U02553    | dual specificity phosphatase 1                          |
| Dusp6        | 322  | 554  | <b>1.72</b>   | NM_053883 | dual specificity phosphatase 6                          |
| Dyrk2_pred   | 101  | 171  | <b>1.69</b>   | AI501693  | Dual-specificity tyrosine-(Y)-phosphorylation regulated |
| Eld1         | 92   | 140  | <b>1.52</b>   | NM_022294 | EGF, latrophilin seven transmembrane domain containi    |
| Ehd2         | 72   | 291  | <b>4.04</b>   | BE110691  | EH-domain containing 2                                  |
| Ehd4         | 73   | 155  | <b>2.11</b>   | BI284307  | EH-domain containing 4                                  |
| Epas1        | 1085 | 2151 | <b>1.98</b>   | AI598434  | endothelial PAS domain protein 1                        |
| Tek          | 108  | 349  | <b>3.24</b>   | AI710931  | Endothelial-specific receptor tyrosine kinase           |
| Efna1        | 33   | 92   | <b>2.83</b>   | AW531877  | ephrin A1                                               |
| Efnb2_pred   | 209  | 350  | <b>1.67</b>   | BF389666  | ephrin B2 (predicted)                                   |
| Egfl6        | 23   | 116  | <b>5.09</b>   | BF418373  | epidermal growth factor-like protein 6                  |
| Fos          | 197  | 506  | <b>2.57</b>   | BF415939  | FBJ murine osteosarcoma viral oncogene homolog          |
| Flt1         | 130  | 204  | <b>1.56</b>   | AI059968  | FMS-like tyrosine kinase 1                              |
| Fxyd3        | 63   | 133  | <b>2.12</b>   | AI009597  | FXYD domain-containing ion transport regulator 3        |
| Fgd5_predi   | 49   | 91   | <b>1.87</b>   | AI555744  | FYVE, RhoGEF and PH domain containing 5 (predicte       |
| Gpr116       | 134  | 424  | <b>3.16</b>   | BI295477  | G protein-coupled receptor 116                          |
| Gprc5a       | 40   | 354  | <b>8.81</b>   | BI276110  | G protein-coupled receptor, family C, group 5, member   |
| Gm2a         | 168  | 259  | <b>1.54</b>   | AI717483  | GM2 ganglioside activator protein                       |
| Gng11        | 102  | 188  | <b>1.84</b>   | NM_022396 | guanine nucleotide binding protein gamma subunit 11     |
| Hspb1        | 118  | 535  | <b>4.54</b>   | NM_031970 | heat shock 27kDa protein 1                              |
| Hspa1a       | 67   | 327  | <b>4.90</b>   | BI278231  | heat shock 70kD protein 1A                              |
| Hspa1a /// l | 45   | 389  | <b>8.70</b>   | NM_031971 | heat shock 70kD protein 1A /// heat shock 70kD protein  |
| Homer1       | 45   | 213  | <b>4.72</b>   | AF030088  | homer, neuronal immediate early gene, 1                 |
| Itga1        | 57   | 150  | <b>2.64</b>   | NM_030994 | integrin alpha 1                                        |
| Itgal        | 43   | 110  | <b>2.58</b>   | BI289767  | Integrin alpha L                                        |
| Itgb1        | 230  | 591  | <b>2.58</b>   | AI177366  | integrin beta 1                                         |
| Itgb2        | 67   | 160  | <b>2.40</b>   | AI177292  | integrin beta 2                                         |
| Itga6        | 297  | 196  | <b>0.66</b>   | BE110753  | integrin, alpha 6                                       |
| Itgb6        | 18   | 106  | <b>5.94</b>   | AI070686  | integrin, beta 6                                        |
| Igtp         | 69   | 123  | <b>1.80</b>   | AI407953  | interferon gamma induced GTPase                         |

|              |     |      |               |           |                                                         |
|--------------|-----|------|---------------|-----------|---------------------------------------------------------|
| Ifitm3       | 146 | 509  | <b>3.47</b>   | BI285494  | interferon induced transmembrane protein 3              |
| lrf7_predict | 67  | 128  | <b>1.91</b>   | BF411036  | interferon regulatory factor 7 (predicted)              |
| lqgap1_pre   | 138 | 369  | <b>2.67</b>   | BM387072  | IQ motif containing GTPase activating protein 1 (predic |
| Lcn2         | 3   | 234  | <b>73.20</b>  | NM_130741 | lipocalin 2                                             |
| Lu           | 71  | 243  | <b>3.44</b>   | NM_031752 | Lutheran blood group (Auberger b antigen included)      |
| Met          | 14  | 99   | <b>6.99</b>   | BG378920  | met proto-oncogene                                      |
| Map2k3_pr    | 78  | 117  | <b>1.52</b>   | BI283843  | mitogen activated protein kinase kinase 3 (predicted)   |
| Parva        | 94  | 155  | <b>1.65</b>   | AA686007  | parvin, alpha                                           |
| Phactr2      | 89  | 148  | <b>1.67</b>   | AW527533  | Phosphatase and actin regulator 2                       |
| Pcyt1b       | 102 | 58   | <b>0.57</b>   | AI175443  | Phosphorylase kinase alpha 1                            |
| Plekhf2_pre  | 108 | 194  | <b>1.79</b>   | AI103367  | pleckstrin homology domain containing, family F (with F |
| RGD:72785    | 3   | 83   | <b>31.87</b>  | AW530225  | prepro-Neuropeptide W polypeptide                       |
| Pacsin1      | 289 | 179  | <b>0.62</b>   | NM_017294 | protein kinase C and casein kinase substrate in neuron  |
| Prkch        | 78  | 118  | <b>1.50</b>   | AA799981  | protein kinase C-eta                                    |
| Ptprc        | 45  | 105  | <b>2.36</b>   | BF288130  | Protein tyrosine phosphatase, receptor type, C          |
| Ptpnf        | 228 | 409  | <b>1.80</b>   | M60103    | protein tyrosine phosphatase, receptor type, F          |
| isg12(b)     | 30  | 144  | <b>4.83</b>   | AA819034  | putative ISG12(b) protein                               |
| Rab2l        | 98  | 218  | <b>2.21</b>   | BI295991  | RAB2, member RAS oncogene family-like                   |
| Rab27a       | 54  | 107  | <b>1.97</b>   | BM389524  | RAB27A, member RAS oncogene family                      |
| Rab3d        | 51  | 80   | <b>1.55</b>   | M83681    | RAB3D, member RAS oncogene family                       |
| Rab5b_pre    | 138 | 91   | <b>0.66</b>   | BF560790  | RAB5B, member RAS oncogene family (predicted)           |
| Rab8b        | 169 | 270  | <b>1.60</b>   | BF398743  | RAB8B, member RAS oncogene family                       |
| Rin2_predict | 190 | 353  | <b>1.85</b>   | BM392293  | Ras and Rab interactor 2 (predicted)                    |
| Rassf7_pre   | 58  | 89   | <b>1.54</b>   | BM385768  | Ras association (RalGDS/AF-6) domain family 7 (predi    |
| Rhoj_predict | 53  | 108  | <b>2.02</b>   | BM389644  | ras homolog gene family, member J (predicted)           |
| Rasip1_pre   | 75  | 149  | <b>2.00</b>   | AA848597  | Ras interacting protein 1 (predicted)                   |
| Rac2_predi   | 53  | 167  | <b>3.17</b>   | AI010476  | RAS-related C3 botulinum substrate 2 (predicted)        |
| Ramp2        | 210 | 556  | <b>2.64</b>   | NM_031646 | receptor (calcitonin) activity modifying protein 2      |
| Rims2        | 76  | 49   | <b>0.64</b>   | NM_053945 | regulating synaptic membrane exocytosis 2               |
| Arhgdib_pr   | 138 | 304  | <b>2.21</b>   | BF285771  | Rho, GDP dissociation inhibitor (GDI) beta (predicted)  |
| Rgnef_prec   | 48  | 90   | <b>1.90</b>   | AW521384  | Rho-guanine nucleotide exchange factor (predicted)      |
| Scgb1a1      | 18  | 5790 | <b>318.15</b> | NM_013051 | secretoglobin, family 1A, member 1                      |
| Sgk          | 360 | 654  | <b>1.82</b>   | NM_019232 | serum/glucocorticoid regulated kinase                   |
| Shc1         | 53  | 107  | <b>2.03</b>   | BF548525  | SHC (Src homology 2 domain-containing) transforming     |
| RGD15627     | 70  | 117  | <b>1.67</b>   | BG669292  | Similar to ABI gene family, member 3 (NESH) binding p   |
| RGD15635     | 87  | 50   | <b>0.58</b>   | BF401477  | similar to AP2 associated kinase 1 (predicted)          |
| LOC688297    | 130 | 85   | <b>0.65</b>   | BG371889  | similar to Retinal rod rhodopsin-sensitive cGMP 3,5-cyc |
| Snf1lk       | 41  | 78   | <b>1.89</b>   | NM_021693 | SNF1-like kinase                                        |
| Snx4_predi   | 374 | 242  | <b>0.65</b>   | AI029221  | Sorting nexin 4 (predicted)                             |
| Scap2        | 103 | 203  | <b>1.98</b>   | NM_130413 | src family associated phosphoprotein 2                  |
| Socs2        | 140 | 220  | <b>1.57</b>   | BM384088  | Suppressor of cytokine signaling 2                      |
| Tns          | 84  | 382  | <b>4.57</b>   | BF290193  | Tensin                                                  |
| Tenc1_prec   | 92  | 151  | <b>1.65</b>   | BI294836  | tensin like C1 domain containing phosphatase (predicte  |
| Tspan8       | 52  | 392  | <b>7.58</b>   | NM_133526 | Tetraspanin 8                                           |
| Tagln2_pre   | 82  | 454  | <b>5.53</b>   | BI285865  | transgelin 2 (predicted)                                |
| Tacstd2      | 20  | 122  | <b>6.02</b>   | AA891826  | tumor-associated calcium signal transducer 2            |
| Vasp_predi   | 102 | 213  | <b>2.10</b>   | AW520792  | vasodilator-stimulated phosphoprotein (predicted)       |
| Wif1         | 52  | 139  | <b>2.68</b>   | NM_053738 | Wnt inhibitory factor 1                                 |
| Anxa4        | 82  | 228  | <b>2.78</b>   | BM385237  | ZAP 36/annexin IV                                       |

### Transcription

| Sample    | F3-Cont | F3-Vinc | Vin/Con |
|-----------|---------|---------|---------|
| Gene Symt | Raw     | Raw     | Ratio   |

| Genbank | Gene Title |
|---------|------------|
|---------|------------|

|              |      |      |              |           |                                                            |
|--------------|------|------|--------------|-----------|------------------------------------------------------------|
| Aebp1_pre    | 93   | 203  | <b>2.20</b>  | BI278482  | AE binding protein 1 (predicted)                           |
| Ahnak        | 274  | 1327 | <b>4.85</b>  | AI407114  | AHNAK nucleoprotein (desmoyokin)                           |
| Rai14        | 48   | 124  | <b>2.58</b>  | AI234852  | Ankyrin repeat and coiled-coil structure-co                |
| Bcl11b_pre   | 421  | 190  | <b>0.45</b>  | BM390227  | B-cell leukemia/lymphoma 11B (predicted)                   |
| Bcor_predic  | 53   | 87   | <b>1.62</b>  | BI289386  | Bcl6 interacting corepressor (predicted)                   |
| Cebpb        | 24   | 104  | <b>4.39</b>  | NM_024125 | CCAAT/enhancer binding protein (C/EBP), beta               |
| Copeb        | 90   | 233  | <b>2.60</b>  | NM_031642 | core promoter element binding protein                      |
| Ddx58_pre    | 42   | 75   | <b>1.80</b>  | AI575264  | DEAD (Asp-Glu-Ala-Asp) box polypeptide 58 (predicted)      |
| Dnajc1_pre   | 82   | 140  | <b>1.70</b>  | BI295806  | DnaJ (Hsp40) homolog, subfamily C, member 1 (predic        |
| Elf1         | 45   | 76   | <b>1.70</b>  | AA818055  | E74-like factor 1 (ets domain transcription factor)        |
| Ebf          | 119  | 65   | <b>0.55</b>  | AI406967  | Early B-cell factor 1                                      |
| Egr2         | 92   | 162  | <b>1.76</b>  | NM_053633 | early growth response 2                                    |
| Egr4         | 74   | 123  | <b>1.66</b>  | NM_019137 | early growth response 4                                    |
| Elk3_predic  | 74   | 145  | <b>1.96</b>  | BM392135  | ELK3, member of ETS oncogene family (predicted)            |
| Fos          | 197  | 506  | <b>2.57</b>  | BF415939  | FBJ murine osteosarcoma viral oncogene homolog             |
| FoxA1        | 6    | 76   | <b>12.63</b> | BM383972  | Forkhead box A1                                            |
| Fhl1         | 620  | 996  | <b>1.61</b>  | BG673187  | four and a half LIM domains 1                              |
| Gata2        | 37   | 107  | <b>2.91</b>  | NM_033442 | GATA binding protein 2                                     |
| Gata6        | 7    | 170  | <b>25.34</b> | AA800786  | GATA binding protein 6                                     |
| Hes1         | 48   | 126  | <b>2.63</b>  | NM_024360 | hairy and enhancer of split 1 (Drosophila)                 |
| Hmgb2 /// L  | 55   | 132  | <b>2.40</b>  | NM_017187 | high mobility group box 2 /// similar to High mobility gro |
| Hoxa5        | 22   | 77   | <b>3.44</b>  | BE107303  | homeo box A5                                               |
| Hod          | 317  | 1216 | <b>3.84</b>  | NM_133621 | homeobox only domain                                       |
| Nr4a1        | 192  | 431  | <b>2.24</b>  | NM_024388 | immediate early gene transcription factor NGFI-B           |
| Id1          | 167  | 386  | <b>2.31</b>  | M86708    | Inhibitor of DNA binding 1, helix-loop-helix protein (spli |
| Junb         | 91   | 144  | <b>1.57</b>  | NM_021836 | Jun-B oncogene                                             |
| Klf2         | 102  | 654  | <b>6.45</b>  | BM385790  | Kruppel-like factor 2                                      |
| Klf4         | 50   | 307  | <b>6.20</b>  | NM_053713 | Kruppel-like factor 4 (gut)                                |
| Klf5         | 58   | 133  | <b>2.28</b>  | NM_053394 | Kruppel-like factor 5 (intestinal)                         |
| Lrrfip1      | 21   | 102  | <b>5.00</b>  | BM387864  | Leucine rich repeat (in FLII) interacting protein 1        |
| Mfhas1_pre   | 109  | 170  | <b>1.55</b>  | AI136864  | malignant fibrous histiocytoma amplified sequence 1 (p     |
| Mgea6_pre    | 143  | 237  | <b>1.65</b>  | AI177180  | meningioma expressed antigen 6 (coiled-coil proline-ric    |
| Mcl1         | 308  | 606  | <b>1.97</b>  | AI102618  | Myeloid cell leukemia sequence 1                           |
| Nfe2l2       | 182  | 295  | <b>1.62</b>  | NM_031789 | NF-E2-related factor 2                                     |
| Nfix         | 1251 | 2557 | <b>2.04</b>  | AI555855  | nuclear factor I/X                                         |
| Nfkbia       | 114  | 326  | <b>2.87</b>  | AW672589  | nuclear factor of kappa light chain gene enhancer in B-    |
| Nr4a3        | 167  | 329  | <b>1.98</b>  | NM_031628 | nuclear receptor subfamily 4, group A, member 3            |
| Ptfr_predict | 566  | 1369 | <b>2.42</b>  | AA899937  | Polymerase I and transcript release factor (predicted)     |
| Runx1        | 39   | 92   | <b>2.34</b>  | NM_017325 | runt related transcription factor 1                        |
| Stat1        | 118  | 182  | <b>1.54</b>  | AW434718  | signal transducer and activator of transcription 1         |
| LOC687536    | 20   | 81   | <b>3.99</b>  | AA817785  | similar to Forkhead box protein F1 (Forkhead-related p     |
| MGC72578     | 84   | 137  | <b>1.62</b>  | BF420059  | similar to immediate early response 2                      |
| LOC499497    | 992  | 1768 | <b>1.78</b>  | BE104219  | similar to MADS box transcription enhancer factor 2, pc    |
| RGD15631     | 739  | 285  | <b>0.39</b>  | BF414312  | similar to MADS box transcription enhancer factor 2, pc    |
| RGD13063     | 44   | 100  | <b>2.26</b>  | AI407047  | similar to Zinc finger protein 198 (Fused in myeloprolife  |
| Sp110_prec   | 68   | 117  | <b>1.73</b>  | AI411381  | SP110 nuclear body protein (predicted)                     |
| Sox13_prec   | 55   | 102  | <b>1.86</b>  | BM383170  | SRY (sex determining region Y)-box 13 (predicted)          |
| Ssg1         | 69   | 125  | <b>1.81</b>  | AI235465  | steroid sensitive gene 1                                   |
| Tnks_predic  | 99   | 169  | <b>1.70</b>  | BM388725  | tankyrase, TRF1-interacting ankyrin-related ADP-ribose     |
| Tiparp_prec  | 109  | 165  | <b>1.51</b>  | AI179464  | TCDD-inducible poly(ADP-ribose) polymerase (predicte       |
| Titf1        | 17   | 217  | <b>12.77</b> | BF389361  | thyroid transcription factor 1                             |
| Tcf21        | 12   | 97   | <b>8.25</b>  | BE113336  | transcription factor 21                                    |
| Tacstd1      | 20   | 217  | <b>10.97</b> | BG376410  | tumor-associated calcium signal transducer 1               |

|            |     |     |             |           |                                                        |
|------------|-----|-----|-------------|-----------|--------------------------------------------------------|
| Txnip      | 237 | 789 | <b>3.33</b> | U30789    | upregulated by 1,25-dihydroxyvitamin D-3               |
| Ets1       | 69  | 175 | <b>2.53</b> | NM_012555 | v-ets erythroblastosis virus E26 oncogene homolog 1 (  |
| Erg        | 31  | 85  | <b>2.76</b> | NM_133397 | v-ets erythroblastosis virus E26 oncogene like (avian) |
| Jun        | 253 | 544 | <b>2.15</b> | BI288619  | v-jun sarcoma virus 17 oncogene homolog (avian)        |
| Zfp36      | 67  | 242 | <b>3.62</b> | AB025017  | zinc finger protein 36                                 |
| Zfp3611    | 316 | 488 | <b>1.54</b> | NM_017172 | zinc finger protein 36, C3H type-like 1                |
| Zfp628_pre | 118 | 60  | <b>0.51</b> | BE097029  | Zinc finger protein 628 (predicted)                    |
| RGD:62867  | 109 | 68  | <b>0.62</b> | AF277900  | zinc finger protein HIT-4                              |
| Zcchc8_pre | 123 | 82  | <b>0.66</b> | AA894084  | zinc finger, CCHC domain containing 8 (predicted)      |
| Zfyve28_pr | 95  | 60  | <b>0.63</b> | BF403058  | Zinc finger, FYVE domain containing 28 (predicted)     |

### Translation\_Protein Modification

| Sample      | F3-Cont | F3-Vinc | Vin/Con      | Genbank   | Gene Title                                               |
|-------------|---------|---------|--------------|-----------|----------------------------------------------------------|
| Gene Symt   | Raw     | Raw     | <b>Ratio</b> | Genbank   | Gene Title                                               |
| Ear11       | 2       | 100     | <b>40.80</b> | D88586    | eosinophil-associated, ribonuclease A family, member 1   |
| Dcps        | 44      | 76      | <b>1.74</b>  | AI535521  | mRNA decapping enzyme                                    |
| Dcps        | 121     | 64      | <b>0.53</b>  | BI288131  | mRNA decapping enzyme                                    |
| Paip1_pred  | 338     | 520     | <b>1.54</b>  | AA963084  | Polyadenylate binding protein-interacting protein 1 (pre |
| Slfn2_predi | 42      | 122     | <b>2.94</b>  | AW915529  | schlafen 2 (predicted)                                   |
| Slfn3       | 31      | 125     | <b>4.06</b>  | NM_053687 | schlafen 3                                               |
| Slfn5_predi | 63      | 172     | <b>2.75</b>  | AI072951  | schlafen 5 (predicted)                                   |
| Cugbp2      | 67      | 117     | <b>1.74</b>  | BF390754  | CUG triplet repeat, RNA binding protein 2                |

### Miscellaneous & Unknown

| Sample       | F3-Cont | F3-Vinc | Vin/Con       | Genbank  | Gene Title                                               |
|--------------|---------|---------|---------------|----------|----------------------------------------------------------|
| Gene Symt    | Raw     | Raw     | <b>Ratio</b>  | Genbank  | Gene Title                                               |
| Lrrc4c_prec  | 209     | 112     | <b>0.53</b>   | AA819053 | leucine rich repeat containing 4C (predicted)            |
| Angel1_pre   | 79      | 38      | <b>0.49</b>   | AI578461 | angel homolog 1 (Drosophila) (predicted)                 |
| ---          | 47      | 106     | <b>2.24</b>   | BM386869 | CDNA clone IMAGE:7366335                                 |
| Cttnbp2nl_f  | 141     | 232     | <b>1.64</b>   | BM383195 | CTTNBP2 N-terminal like (predicted)                      |
| Fam38a_pr    | 23      | 75      | <b>3.20</b>   | BI274438 | family with sequence similarity 38, member A (predicted) |
| Gm1960       | 11      | 276     | <b>24.89</b>  | AW917501 | gene model 1960, (NCBI)                                  |
| Gm1960       | 4       | 958     | <b>228.15</b> | D21095   | gene model 1960, (NCBI)                                  |
| RGD13115:    | 100     | 163     | <b>1.62</b>   | BF288207 | hypothetical LOC315055 (predicted)                       |
| LOC49854:    | 367     | 1672    | <b>4.55</b>   | AA800750 | hypothetical protein LOC498544                           |
| Kirrel3_prec | 347     | 211     | <b>0.61</b>   | BF399121 | kin of IRRE like 3 (Drosophila) (predicted)              |
| Lims2_prec   | 30      | 75      | <b>2.51</b>   | BI275904 | LIM and senescent cell antigen like domains 2 (predicte  |
| Mtac2d1      | 35      | 194     | <b>5.57</b>   | BI302544 | membrane targeting (tandem) C2 domain containing 1       |
| Perc64       | 35      | 103     | <b>2.93</b>   | BM384701 | PE responsive protein c64                                |
| Perc64       | 63      | 176     | <b>2.78</b>   | BI278571 | PE responsive protein c64                                |
| Pqlc3        | 66      | 115     | <b>1.75</b>   | AW915795 | PQ loop repeat containing 3                              |
| Sema3g       | 210     | 387     | <b>1.84</b>   | BE108859 | Sema domain, immunoglobulin domain (Ig), short basic     |
| Sema3c_pr    | 103     | 238     | <b>2.30</b>   | BM390322 | sema domain, immunoglobulin domain (Ig), short basic     |
| Sdpr         | 82      | 802     | <b>9.79</b>   | AI009714 | serum deprivation response protein                       |
| Sh2d4a_pr    | 21      | 97      | <b>4.69</b>   | AA800626 | SH2 domain containing 4A (predicted)                     |
| Stac2_pred   | 81      | 48      | <b>0.60</b>   | BF406342 | SH3 and cysteine rich domain 2 (predicted)               |
| Spn          | 34      | 126     | <b>3.74</b>   | BF550890 | sialophorin                                              |
| ---          | 51      | 84      | <b>1.65</b>   | AA858591 | similar HORMA domain containing 1 (predicted)            |
| MGC10949     | 44      | 93      | <b>2.10</b>   | AI071166 | similar to 1110007F12Rik protein                         |
| ---          | 69      | 232     | <b>3.35</b>   | BM385779 | Similar to 1300014I06Rik protein (predicted)             |
| RGD13095:    | 47      | 77      | <b>1.63</b>   | AI102745 | Similar to 2310014H01Rik protein (predicted)             |
| RGD13069     | 34      | 81      | <b>2.38</b>   | AA819788 | similar to 5830458K16Rik protein (predicted)             |
| RGD13048     | 123     | 81      | <b>0.66</b>   | AI044301 | similar to 6430573F11Rik protein (predicted)             |

|              |     |     |              |          |                                                            |
|--------------|-----|-----|--------------|----------|------------------------------------------------------------|
| ---          | 29  | 162 | <b>5.67</b>  | BE109323 | Similar to 9530046H09Rik protein (predicted)               |
| LOC309112    | 59  | 115 | <b>1.96</b>  | AI178948 | similar to BC026645 protein                                |
| LOC680229    | 334 | 145 | <b>0.43</b>  | AI413058 | Similar to Beta-sarcoglycan (Beta-SG) (43 kDa dystrop      |
| RGD15594     | 98  | 148 | <b>1.51</b>  | BF291168 | Similar to BH3-only member B protein (predicted)           |
| LOC679937    | 25  | 316 | <b>12.85</b> | BM386323 | similar to CG4025-PA                                       |
| RGD13081     | 53  | 85  | <b>1.59</b>  | AA899109 | similar to chromosome 17 open reading frame 27 (pred       |
| RGD15651     | 16  | 179 | <b>10.93</b> | AI045955 | similar to Clecsf12 protein (predicted)                    |
| LOC304138    | 150 | 475 | <b>3.17</b>  | AA818900 | similar to cysteine and tyrosine-rich protein 1            |
| RGD15663     | 37  | 95  | <b>2.59</b>  | AA946147 | Similar to cysteine-rich glycoprotein (predicted)          |
| LOC691657    | 37  | 315 | <b>8.43</b>  | BF550246 | Similar to Cysteine-rich protein 1 (Cysteine-rich intestin |
| RGD13080     | 118 | 190 | <b>1.61</b>  | AI408727 | similar to DNA segment, Chr 4, Brigham & Womens Ge         |
| LOC499322    | 13  | 226 | <b>17.06</b> | AA799328 | similar to expressed sequence AW413625                     |
| LOC687266    | 29  | 103 | <b>3.50</b>  | AI072658 | similar to Folylpolyglutamate synthase, mitochondrial p    |
| LOC291964    | 51  | 84  | <b>1.64</b>  | BI281796 | similar to Formin homology 2 domain containing 1           |
| RGD13075     | 41  | 91  | <b>2.23</b>  | AI231799 | similar to Friedreich ataxia region gene X123 (predicte    |
| RGD13105     | 67  | 116 | <b>1.74</b>  | BG375354 | similar to hypothetical protein FLJ14146 (predicted)       |
| RGD131131    | 90  | 158 | <b>1.77</b>  | BI294811 | similar to hypothetical protein FLJ20037 (predicted)       |
| RGD15596     | 399 | 247 | <b>0.62</b>  | BE101933 | similar to hypothetical protein FLJ25477 isoform 2 (pre    |
| LOC363097    | 5   | 128 | <b>24.46</b> | AI103939 | similar to hypothetical protein FLJ30973                   |
| RGD13058     | 36  | 102 | <b>2.85</b>  | BI288939 | similar to hypothetical protein FLJ40283 (predicted)       |
| LOC500300    | 41  | 109 | <b>2.68</b>  | BM390487 | similar to hypothetical protein MGC6835                    |
| MGC12488     | 138 | 253 | <b>1.83</b>  | AI176611 | Similar to Mob4B protein                                   |
| RGD15619     | 48  | 87  | <b>1.82</b>  | BM390809 | similar to Muc5b protein (predicted)                       |
| LOC309498    | 34  | 88  | <b>2.57</b>  | AW917760 | similar to Myoferlin (Fer-1 like protein 3)                |
| RGD15616     | 174 | 327 | <b>1.88</b>  | AA997745 | similar to nemo like kinase (predicted)                    |
| LOC686753    | 28  | 250 | <b>8.87</b>  | AA851385 | similar to nephronectin isoform a                          |
| LOC287346    | 56  | 177 | <b>3.16</b>  | BF284080 | similar to novel protein                                   |
| LOC287346    | 47  | 144 | <b>3.09</b>  | AA957487 | similar to novel protein                                   |
| LOC315732    | 31  | 75  | <b>2.46</b>  | BI276339 | similar to Nuclear membrane binding protein NUCLING        |
| B130017107   | 145 | 319 | <b>2.20</b>  | AI407483 | Similar to Parg1-pending protein (predicted)               |
| LOC684877    | 19  | 129 | <b>6.88</b>  | AI230625 | similar to Protein C8orf4 (Thyroid cancer protein 1) (TC   |
| MGC10877     | 91  | 459 | <b>5.03</b>  | BM391248 | similar to RIKEN cDNA 1810057C19                           |
| LOC498642    | 42  | 95  | <b>2.28</b>  | AW252379 | similar to RNA binding protein gene with multiple splicir  |
| LOC690777    | 38  | 78  | <b>2.04</b>  | BF404935 | Similar to RUN and FYVE domain-containing 2                |
| LOC362057    | 70  | 143 | <b>2.03</b>  | BF285490 | similar to semaF cytoplasmic domain associated protei      |
| RGD15625     | 72  | 110 | <b>1.53</b>  | AW142608 | similar to SH3-containing guanine nucleotide exchange      |
| LOC686542    | 84  | 53  | <b>0.63</b>  | AW527248 | similar to slit homolog 1                                  |
| MGC94010     | 187 | 338 | <b>1.80</b>  | BM384419 | Similar to SPI6                                            |
| RGD15621     | 269 | 162 | <b>0.60</b>  | AW521222 | Similar to TAF5                                            |
| LOC500040    | 127 | 199 | <b>1.57</b>  | BI288769 | similar to Testis derived transcript                       |
| LOC315842    | 46  | 114 | <b>2.49</b>  | BE107185 | similar to WD repeat domain 11 protein                     |
| Slitrk1_prec | 157 | 94  | <b>0.60</b>  | AW523107 | SLIT and NTRK-like family, member 1 (predicted)            |
| Spsb1_prec   | 80  | 49  | <b>0.61</b>  | BE106389 | SplA/ryanodine receptor domain and SOCS box contain        |
| Samd8        | 85  | 50  | <b>0.59</b>  | BI295733 | sterile alpha motif domain containing 8                    |
| Tmem10_p     | 487 | 324 | <b>0.67</b>  | AI717253 | transmembrane protein 10 (predicted)                       |
| Tmem123      | 94  | 169 | <b>1.81</b>  | AI171651 | transmembrane protein 123//transmembrane protein 12        |
| Tnrc6_pred   | 578 | 872 | <b>1.51</b>  | BI294732 | Trinucleotide repeat containing 6 (predicted)              |
| Trim23       | 135 | 87  | <b>0.64</b>  | L04760   | tripartite motif protein 23                                |
| Trim_predic  | 61  | 105 | <b>1.73</b>  | BI280655 | Tripartite motif protein 34 (predicted)                    |
| RGD:73507    | 76  | 163 | <b>2.16</b>  | AI009530 | Unknown (protein for MGC:72614)                            |
| Wfdc2        | 26  | 265 | <b>10.10</b> | AI411527 | WAP four-disulfide core domain 2                           |

## EST

| Sample    | F3-Cont | F3-Vinc | Vin/Con      | Genbank  | Gene Title                                             |
|-----------|---------|---------|--------------|----------|--------------------------------------------------------|
| Gene Symt | Raw     | Raw     | Ratio        |          |                                                        |
| ---       | 138     | 222     | <b>1.61</b>  | AI031032 | Transcribed locus, weakly similar to XP_341951.1 PRE   |
| ---       | 123     | 222     | <b>1.80</b>  | AI598401 | Transcribed locus, weakly similar to NP_002639.1 pim-  |
| ---       | 49      | 76      | <b>1.55</b>  | BM385157 | Transcribed locus, strongly similar to XP_001058445.1  |
| ---       | 270     | 429     | <b>1.59</b>  | BI289625 | Transcribed locus, strongly similar to NP_035333.2 pro |
| ---       | 131     | 79      | <b>0.60</b>  | BF403401 | Transcribed locus, moderately similar to XP_580018.1   |
| ---       | 91      | 215     | <b>2.36</b>  | BI278962 | Transcribed locus, moderately similar to NP_795929.1   |
| ---       | 26      | 128     | <b>4.89</b>  | BM389422 | Transcribed locus, moderately similar to NP_694996.2   |
| ---       | 127     | 79      | <b>0.62</b>  | BF403165 | Transcribed locus                                      |
| ---       | 68      | 117     | <b>1.73</b>  | AI175779 | Transcribed locus                                      |
| ---       | 65      | 106     | <b>1.64</b>  | AI408264 | Transcribed locus                                      |
| ---       | 150     | 92      | <b>0.62</b>  | BF549454 | Transcribed locus                                      |
| ---       | 95      | 57      | <b>0.61</b>  | BF391706 | Transcribed locus                                      |
| ---       | 27      | 103     | <b>3.86</b>  | AI233857 | Transcribed locus                                      |
| ---       | 106     | 201     | <b>1.90</b>  | AI411809 | Transcribed locus                                      |
| ---       | 179     | 478     | <b>2.68</b>  | BF283404 | Transcribed locus                                      |
| ---       | 63      | 101     | <b>1.60</b>  | BE116601 | Transcribed locus                                      |
| ---       | 45      | 118     | <b>2.62</b>  | BM384377 | Transcribed locus                                      |
| ---       | 52      | 175     | <b>3.36</b>  | BF407452 | Transcribed locus                                      |
| ---       | 112     | 237     | <b>2.11</b>  | BI283685 | Transcribed locus                                      |
| ---       | 67      | 107     | <b>1.60</b>  | AI169118 | Transcribed locus                                      |
| ---       | 134     | 215     | <b>1.60</b>  | AI709424 | Transcribed locus                                      |
| ---       | 104     | 161     | <b>1.54</b>  | AA900322 | Transcribed locus                                      |
| ---       | 761     | 501     | <b>0.66</b>  | AA925373 | Transcribed locus                                      |
| ---       | 40      | 129     | <b>3.25</b>  | AI058292 | Transcribed locus                                      |
| ---       | 36      | 300     | <b>8.39</b>  | BE107090 | Transcribed locus                                      |
| ---       | 106     | 166     | <b>1.56</b>  | BE103875 | Transcribed locus                                      |
| ---       | 84      | 54      | <b>0.64</b>  | AA924955 | Transcribed locus                                      |
| ---       | 182     | 279     | <b>1.53</b>  | BF545309 | Transcribed locus                                      |
| ---       | 29      | 78      | <b>2.72</b>  | AA818143 | Transcribed locus                                      |
| ---       | 220     | 398     | <b>1.81</b>  | BF563716 | Transcribed locus                                      |
| ---       | 67      | 147     | <b>2.20</b>  | AI178627 | Transcribed locus                                      |
| ---       | 45      | 106     | <b>2.37</b>  | AI410262 | Transcribed locus                                      |
| ---       | 13      | 206     | <b>15.76</b> | AA859079 | Transcribed locus                                      |
| ---       | 107     | 65      | <b>0.61</b>  | BE099664 | Transcribed locus                                      |
| ---       | 162     | 100     | <b>0.62</b>  | BE117653 | Transcribed locus                                      |
| ---       | 340     | 20      | <b>0.06</b>  | AA964506 | Transcribed locus                                      |
| ---       | 77      | 116     | <b>1.51</b>  | AW918368 | Transcribed locus                                      |
| ---       | 311     | 587     | <b>1.89</b>  | AI144865 | Transcribed locus                                      |
| ---       | 288     | 504     | <b>1.75</b>  | AI071538 | Transcribed locus                                      |
| ---       | 73      | 143     | <b>1.96</b>  | AI228481 | Transcribed locus                                      |
| ---       | 162     | 99      | <b>0.61</b>  | AW531387 | Transcribed locus                                      |
| ---       | 747     | 466     | <b>0.62</b>  | AI100827 | Transcribed locus                                      |
| ---       | 46      | 120     | <b>2.64</b>  | BE115859 | Transcribed locus                                      |
| ---       | 120     | 181     | <b>1.51</b>  | AI502604 | Transcribed locus                                      |
| ---       | 27      | 81      | <b>3.03</b>  | BF389682 | Transcribed locus                                      |
| ---       | 48      | 110     | <b>2.30</b>  | BI277619 | Transcribed locus                                      |
| ---       | 49      | 77      | <b>1.55</b>  | AA818282 | Transcribed locus                                      |
| ---       | 427     | 278     | <b>0.65</b>  | AA955175 | Transcribed locus                                      |
| ---       | 57      | 105     | <b>1.84</b>  | AI408734 | Transcribed locus                                      |
| ---       | 171     | 281     | <b>1.64</b>  | BI279751 | Transcribed locus                                      |
| ---       | 485     | 914     | <b>1.89</b>  | BE107419 | Transcribed locus                                      |

|           |     |     |              |                 |                                                       |
|-----------|-----|-----|--------------|-----------------|-------------------------------------------------------|
| ---       | 43  | 116 | <b>2.67</b>  | BE101285        | Transcribed locus                                     |
| ---       | 124 | 221 | <b>1.79</b>  | BF551377        | Transcribed locus                                     |
| RGD13052  | 39  | 77  | <b>1.95</b>  | BF393865        | similar to RIKEN cDNA C130022K22 gene (predicted)     |
| LOC362898 | 105 | 170 | <b>1.61</b>  | AA859508        | similar to RIKEN cDNA 9330161F08                      |
| RGD131118 | 297 | 562 | <b>1.89</b>  | AI716248        | similar to RIKEN cDNA 9230117N10 (predicted)          |
| RGD13070  | 150 | 276 | <b>1.85</b>  | BM384306        | similar to RIKEN cDNA 9130404D14 (predicted)          |
| LOC313518 | 41  | 121 | <b>2.95</b>  | AW915484        | similar to RIKEN cDNA 5330440M15 /// similar to hypot |
| RGD131158 | 80  | 49  | <b>0.61</b>  | BF407634        | similar to RIKEN cDNA 5033405K12 (predicted)          |
| LOC49980  | 102 | 171 | <b>1.68</b>  | BE328914        | similar to RIKEN cDNA 4933404M02                      |
| RGD13064  | 117 | 67  | <b>0.58</b>  | BF396478        | similar to RIKEN cDNA 4930556P03 (predicted)          |
| RGD13050  | 143 | 408 | <b>2.84</b>  | AI171466        | similar to RIKEN cDNA 2700055K07 (predicted)          |
| Rod1      | 212 | 389 | <b>1.84</b>  | BI280285        | Similar to RIKEN cDNA 2610207I16 (predicted)          |
| RGD15630  | 95  | 150 | <b>1.57</b>  | BF291140        | similar to RIKEN cDNA 2010106G01 (predicted)          |
| LOC363068 | 5   | 113 | <b>22.77</b> | AI599133        | similar to RIKEN cDNA 1600029D21                      |
| ---       | 46  | 89  | <b>1.94</b>  | AA924459        | Similar to RIKEN cDNA 1200013B08                      |
| RGD13103  | 107 | 182 | <b>1.70</b>  | H33457          | similar to RIKEN cDNA 1200004M23 (predicted)          |
| LOC500840 | 84  | 219 | <b>2.61</b>  | AI178214        | LOC500840                                             |
| LOC500719 | 29  | 92  | <b>3.16</b>  | AW919728        | LOC500719 /// LOC500720 /// LOC500721                 |
| LOC500488 | 53  | 250 | <b>4.76</b>  | BM387041        | LOC500488                                             |
| LOC499318 | 175 | 353 | <b>2.02</b>  | BM388445        | LOC499318                                             |
| LOC498261 | 30  | 102 | <b>3.44</b>  | AI177743        | LOC498261                                             |
| LOC497957 | 49  | 97  | <b>1.98</b>  | BF399335        | LOC497957                                             |
| ---       | 112 | 69  | <b>0.62</b>  | BI273954        | ---                                                   |
| ---       | 614 | 326 | <b>0.53</b>  | BF393011        | ---                                                   |
| ---       | 90  | 495 | <b>5.50</b>  | BF542239        | ---                                                   |
| ---       | 81  | 49  | <b>0.60</b>  | AW527725        | ---                                                   |
| ---       | 111 | 182 | <b>1.64</b>  | BE102708        | ---                                                   |
| ---       | 69  | 118 | <b>1.72</b>  | BF390648        | ---                                                   |
| ---       | 317 | 165 | <b>0.52</b>  | BI303277        | ---                                                   |
| ---       | 46  | 97  | <b>2.10</b>  | AW528011        | ---                                                   |
| ---       | 81  | 247 | <b>3.03</b>  | AI101416        | ---                                                   |
| ---       | 53  | 120 | <b>2.28</b>  | AI071755        | ---                                                   |
| ---       | 51  | 197 | <b>3.91</b>  | AI575277        | ---                                                   |
| ---       | 107 | 70  | <b>0.65</b>  | AA998001        | ---                                                   |
| ---       | 22  | 82  | <b>3.66</b>  | AI043711        | ---                                                   |
| ---       | 321 | 167 | <b>0.52</b>  | AI555608        | ---                                                   |
| ---       | 105 | 168 | <b>1.60</b>  | BE329364        | ---                                                   |
| ---       | 96  | 61  | <b>0.64</b>  | AI013683        | ---                                                   |
| ---       | 88  | 57  | <b>0.64</b>  | AW529368        | ---                                                   |
| ---       | 168 | 109 | <b>0.65</b>  | AI029275        | ---                                                   |
| ---       | 88  | 28  | <b>0.32</b>  | BI297481        | ---                                                   |
| ---       | 12  | 95  | <b>7.93</b>  | AA893192        | ---                                                   |
| LOC498278 | 283 | 479 | <b>1.69</b>  | BE111722        | ---                                                   |
| ---       | 260 | 129 | <b>0.49</b>  | AI169620        | ---                                                   |
| ---       | 61  | 118 | <b>1.94</b>  | BM388957        | ---                                                   |
| ---       | 168 | 302 | <b>1.80</b>  | AI012566        | ---                                                   |
| ---       | 125 | 259 | <b>2.08</b>  | BE103242        | Transcribed locus                                     |
| LOC679818 | 63  | 148 | <b>2.34</b>  | AA963975        | similar to GLI pathogenesis-related 2                 |
| ---       | 78  | 117 | <b>1.50</b>  | <b>AW253907</b> | Transmembrane 9 superfamily protein member 4 (pred    |
| LOC291318 | 310 | 474 | <b>1.53</b>  | AA900781        | N-myristoyltransferase 2                              |
