# Supplementary material for: Transgenerational Epigenetic Programming of the Brain Transcriptome and Anxiety Behavior
Source: PubMed Central journal article supplement (PMC2581440; doi:10.1371/journal.pone.0003745), 2008-11-18
Supplement: pone.0003745.s004.pdf [file pone.0003745.s004.pdf]

**Table S2**  
**Transgenerational Male Amygdala Regulated Genes**

**Apoptosis**

| Sample      | F3-Cont | F3-Vinc | Vin/Con     | Genbank  | Gene Title                                 |
|-------------|---------|---------|-------------|----------|--------------------------------------------|
| Gene Symbol | Raw     | Raw     | Ratio       |          |                                            |
| Apg12       | 91      | 52      | <b>0.57</b> | BF563278 | Autophagy-related 12 (yeast)               |
| Acin1       | 64      | 97      | <b>1.50</b> | BE116857 | Apoptotic chromatin condensation inducer 1 |

**Cell Cycle**

| Sample      | F3-Cont | F3-Vinc | Vin/Con     | Genbank  | Gene Title                                          |
|-------------|---------|---------|-------------|----------|-----------------------------------------------------|
| Gene Symbol | Raw     | Raw     | Ratio       |          |                                                     |
| Cdc2l5      | 60      | 92      | <b>1.53</b> | BF405622 | Cell division cycle 2-like 5 (cholinesterase-relate |
| Sugt1       | 417     | 691     | <b>1.66</b> | BI299197 | SGT1, suppressor of G2 allele of SKP1 (S. cere      |
| Kif5b       | 124     | 76      | <b>0.61</b> | AA924572 | kinesin family member 5B                            |

**Cytoskeleton-ECM**

| Sample           | F3-Cont    | F3-Vinc   | Vin/Con     | Genbank         | Gene Title                                       |
|------------------|------------|-----------|-------------|-----------------|--------------------------------------------------|
| Gene Symbol      | Raw        | Raw       | Ratio       |                 |                                                  |
| Boc_predicted    | 100        | 50        | <b>0.51</b> | BE110539        | Biregional cell adhesion molecule-related/down-  |
| Cdh22            | 77         | 25        | <b>0.32</b> | BF388223        | Cadherin 22                                      |
| Cotl1_predicted  | 120        | 246       | <b>2.04</b> | AI411057        | coactosin-like 1 (Dictyostelium) (predicted)     |
| Eml1             | 180        | 273       | <b>1.52</b> | BI289642        | Echinoderm microtubule associated protein like   |
| Flnb_predicted   | 111        | 37        | <b>0.34</b> | BI275447        | Filamin, beta (predicted)                        |
| Kif5a            | 141        | 87        | <b>0.62</b> | BF408765        | Kinesin family member 5A                         |
| Mical2_predicted | 78         | 47        | <b>0.61</b> | BI274243        | Microtubule associated monooxygenase, calponi    |
| Map1b            | 150        | 85        | <b>0.57</b> | BE096402        | Microtubule-associated protein 1b                |
| Map4             | 646        | 1046      | <b>1.62</b> | AI230787        | Microtubule-associated protein 4                 |
| Mapre1           | 232        | 131       | <b>0.56</b> | U75920          | microtubule-associated protein, RP/EB family, r  |
| Opcml            | 534        | 822       | <b>1.54</b> | M88709          | Opioid binding protein/cell adhesion molecule-li |
| RGD:619969       | 263        | 149       | <b>0.56</b> | NM_020074       | proteoglycan peptide core protein                |
| <b>Pcdh7</b>     | <b>138</b> | <b>79</b> | <b>0.57</b> | <b>BE121006</b> | <b>protocadherin 7///Transcribe locus</b>        |
| RGD:621676       | 90         | 58        | <b>0.65</b> | BI282702        | smooth muscle alpha-actin                        |
| <b>LOC685664</b> | <b>142</b> | <b>76</b> | <b>0.53</b> | <b>BF406304</b> | <b>similar to axonemal dynein light chain 1</b>  |
| Vezt             | 59         | 98        | <b>1.67</b> | AI235367        | Vezenin, adherens junctions transmembrane pro    |

**Development**

| Sample                 | F3-Cont   | F3-Vinc   | Vin/Con     | Genbank         | Gene Title                                           |
|------------------------|-----------|-----------|-------------|-----------------|------------------------------------------------------|
| Gene Symbol            | Raw       | Raw       | Ratio       |                 |                                                      |
| Hnt                    | 730       | 363       | <b>0.50</b> | AA955579        | neurotrimin                                          |
| Apc                    | 200       | 115       | <b>0.57</b> | NM_012499       | adenomatosis polyposis coli                          |
| Ash1l_predicted        | 157       | 100       | <b>0.64</b> | BE119506        | Ash1 (absent, small, or homeotic)-like (Drosoph      |
| <b>Auts2_predicter</b> | <b>79</b> | <b>37</b> | <b>0.46</b> | <b>AI070144</b> | <b>Autism susceptibility candidate 2 (predicted)</b> |
| Cpne8_predictec        | 119       | 199       | <b>1.68</b> | AI059204        | Copine VIII (predicted)                              |
| Hrpt2_predicted        | 541       | 273       | <b>0.50</b> | BI290578        | hyperparathyroidism 2 (with jaw tumor) (predicte     |
| Inexa                  | 203       | 317       | <b>1.56</b> | X52017          | Internexin, alpha                                    |
| Kirrel3_predicted      | 127       | 82        | <b>0.65</b> | BF399121        | kin of IRRE like 3 (Drosophila) (predicted)          |
| Lmo3                   | 556       | 214       | <b>0.39</b> | AF353304        | LIM domain only 3                                    |
| LOC680445              | 92        | 53        | <b>0.58</b> | AA875457        | similar to muscleblind-like 2 isoform 1              |
| Lrrtm3_predicted       | 79        | 40        | <b>0.50</b> | BE107602        | Leucine rich repeat transmembrane neuronal 3         |
| Ndph_predicted         | 164       | 101       | <b>0.62</b> | BF394149        | Norrie disease homolog (human) (predicted)           |
| Negr1                  | 80        | 37        | <b>0.46</b> | AW527711        | Neuronal growth regulator 1                          |
| Nelf                   | 906       | 1389      | <b>1.53</b> | AJ293698        | Nasal embryonic LHRH factor                          |

|                |            |            |             |           |                                           |
|----------------|------------|------------|-------------|-----------|-------------------------------------------|
| Pmch           | 54         | 108        | <b>1.99</b> | NM_012625 | Pro-melanin-concentrating hormone         |
| RGD1565646_pr  | 113        | 44         | <b>0.39</b> | AI111954  | Similar to SOX2 protein (predicted)       |
| Sacs_predicted | 109        | 61         | <b>0.56</b> | BF567998  | Sacsin (predicted)                        |
| <b>Sncg</b>    | <b>368</b> | <b>837</b> | <b>2.28</b> |           | <b>Synuclein, gamma</b>                   |
| Sox9           | 812        | 352        | <b>0.43</b> | AI454332  | SRY-box containing gene 9                 |
| Tex264         | 134        | 204        | <b>1.52</b> | AW252660  | Testis expressed gene 264 homolog (mouse) |

### Golgi Apparatus

| Sample          | F3-Cont | F3-Vinc | Vin/Con     | Genbank  | Gene Title                                       |
|-----------------|---------|---------|-------------|----------|--------------------------------------------------|
| Gene Symbol     | Raw     | Raw     | Ratio       |          |                                                  |
| Chst8_predicted | 51      | 100     | <b>1.97</b> | AI501232 | Carbohydrate (N-acetylgalactosamine 4-0) sulfo   |
| Gga3_predicted  | 166     | 104     | <b>0.63</b> | BE112983 | Golgi associated, gamma adaptin ear containing   |
| Hs2st1_predicte | 79      | 48      | <b>0.62</b> | AW530083 | heparan sulfate 2-O-sulfotransferase 1 (predicte |
| Man1a2_predicte | 121     | 73      | <b>0.60</b> | BF401339 | mannosidase, alpha, class 1A, member 2 (predi    |

### Growth Factors and Cytokines

| Sample      | F3-Cont | F3-Vinc | Vin/Con     | Genbank   | Gene Title                                       |
|-------------|---------|---------|-------------|-----------|--------------------------------------------------|
| Gene Symbol | Raw     | Raw     | Ratio       |           |                                                  |
| Csf1        | 315     | 176     | <b>0.56</b> | AW535553  | colony stimulating factor 1(macrophage)          |
| Fgfr1       | 197     | 318     | <b>1.61</b> | BI275155  | Fibroblast growth factor receptor 1              |
| Fstl1       | 78      | 48      | <b>0.62</b> | NM_024369 | follistatin-like 1                               |
| Grem1       | 87      | 45      | <b>0.52</b> | NM_019282 | Gremlin 1 homolog, cysteine knot superfamily ( ) |
| Wnt4        | 68      | 136     | <b>1.99</b> | NM_053402 | wingless-type MMTV integration site family, mer  |

### Immune Response

| Sample                 | F3-Cont    | F3-Vinc   | Vin/Con     | Genbank         | Gene Title                                       |
|------------------------|------------|-----------|-------------|-----------------|--------------------------------------------------|
| Gene Symbol            | Raw        | Raw       | Ratio       |                 |                                                  |
| Cdw92                  | 91         | 58        | <b>0.63</b> | AI105205        | CDW92 antigen                                    |
| Igsf4a                 | 244        | 155       | <b>0.64</b> | AA900645        | immunoglobulin superfamily, member 4A            |
| Irf5_predicted         | 77         | 126       | <b>1.64</b> | BF284236        | Interferon regulatory factor 5 (predicted)       |
| RGD1306344             | 83         | 53        | <b>0.63</b> | AI073208        | Similar to Ab1-133                               |
| LOC690085              | 125        | 199       | <b>1.60</b> | AW534002        | Similar to B-cell CLL/lymphoma 7A                |
| LOC680404              | 769        | 1215      | <b>1.58</b> | BG374818        | Similar to Complement C1q-like protein 3 precu   |
| <b>Sart2_predicted</b> | <b>112</b> | <b>66</b> | <b>0.58</b> | <b>BM386930</b> | <b>Squamous cell carcinoma antigen recognize</b> |
| Tollip_predicted       | 87         | 51        | <b>0.59</b> | BF408962        | Toll interacting protein (predicted)             |

### Metabolism

| Sample          | F3-Cont | F3-Vinc | Vin/Con     | Genbank   | Gene Title                                     |
|-----------------|---------|---------|-------------|-----------|------------------------------------------------|
| Gene Symbol     | Raw     | Raw     | Ratio       |           |                                                |
| Abcc1           | 107     | 71      | <b>0.66</b> | AI059506  | ATP-binding cassette, sub-family C (CFTR/MRF   |
| Abhd8_predicted | 246     | 164     | <b>0.66</b> | AI137533  | Abhydrolase domain containing 8 (predicted)    |
| Adpgk           | 107     | 191     | <b>1.79</b> | BE102146  | ADP-dependent glucokinase                      |
| Agpat1          | 99      | 175     | <b>1.76</b> | BI284306  | 1-acylglycerol-3-phosphate O-acyltransferase 1 |
| Art3_predicted  | 113     | 70      | <b>0.62</b> | AI104393  | ADP-ribosyltransferase 3 (predicted)           |
| Asph_predicted  | 127     | 71      | <b>0.56</b> | AI113308  | aspartate-beta-hydroxylase (predicted)         |
| Atp1b2          | 239     | 99      | <b>0.42</b> | U45946    | ATPase, Na+/K+ transporting, beta 2 polypeptid |
| Atp2b1          | 184     | 300     | <b>1.63</b> | AW534277  | ATPase, Ca++ transporting, plasma membrane     |
| Clstn2          | 54      | 119     | <b>2.19</b> | BE109141  | Calsyntenin 2                                  |
| Comt            | 293     | 182     | <b>0.62</b> | NM_012531 | <i>catechol-O-methyltransferase</i>            |
| Cyp2d22         | 162     | 107     | <b>0.66</b> | U48220    | Cytochrome P450, family 2, subfamily d, polype |
| Dpysl2          | 426     | 171     | <b>0.40</b> | BE118404  | dihydropyrimidinase-like 2                     |
| Entpd3          | 82      | 52      | <b>0.63</b> | AI070096  | Ectonucleoside triphosphate diphosphohydrolas  |
| Folh1           | 77      | 48      | <b>0.63</b> | AF040256  | Folate hydrolase                               |

|                  |     |     |             |           |                                                      |
|------------------|-----|-----|-------------|-----------|------------------------------------------------------|
| Glul             | 793 | 462 | <b>0.58</b> | BI296610  | glutamine synthetase 1                               |
| Kcnj3            | 91  | 41  | <b>0.46</b> | U09243    | Potassium inwardly-rectifying channel, subfamily     |
| Kcnk1            | 113 | 64  | <b>0.57</b> | NM_021688 | putative potassium channel TWIK                      |
| Kcnq3            | 141 | 88  | <b>0.62</b> | BF400850  | Potassium voltage-gated channel, subfamily Q,        |
| Magi2            | 98  | 65  | <b>0.66</b> | BF412454  | Membrane associated guanylate kinase, WW ar          |
| Nmt2             | 112 | 65  | <b>0.58</b> | AA900781  | N-myristoyltransferase 2                             |
| RGD1559938_pr    | 117 | 204 | <b>1.74</b> | AI101062  | Similar to spermine synthase (predicted)             |
| Scn4b            | 202 | 128 | <b>0.63</b> | AI137995  | Sodium channel, voltage-gated, type IV, beta         |
| Slc15a2          | 330 | 500 | <b>1.52</b> | NM_031672 | Solute carrier family 15 (H+/peptide transporter)    |
| Slc27a4          | 177 | 101 | <b>0.57</b> | BI286134  | Solute carrier family 27 (fatty acid transporter), r |
| Slc4a11_predicte | 107 | 64  | <b>0.60</b> | BI293444  | Solute carrier family 4, sodium bicarbonate trans    |
| Sqle             | 187 | 286 | <b>1.53</b> | NM_017136 | Squalene epoxidase                                   |
| Tmed5            | 57  | 99  | <b>1.74</b> | AI137113  | Transmembrane emp24 protein transport domai          |
| Xylt2            | 84  | 49  | <b>0.58</b> | AA892497  | Xylosyltransferase II                                |

### Proteolysis

| Sample                | F3-Cont   | F3-Vinc   | Vin/Con     | Genbank         | Gene Title                                           |
|-----------------------|-----------|-----------|-------------|-----------------|------------------------------------------------------|
| Gene Symbol           | Raw       | Raw       | Ratio       | Genbank         | Gene Title                                           |
| Psmc3ip               | 81        | 50        | <b>0.61</b> | NM_134458       | proteasome (prosome, macropain) 26S subunit,         |
| <b>Rnf6_predicted</b> | <b>31</b> | <b>77</b> | <b>2.46</b> | <b>BI296352</b> | <b>Ring finger protein (C3H2C3 type) 6 (predicte</b> |
| RGD1560364_pr         | 99        | 43        | <b>0.44</b> | BE108174        | Similar to vacuolar protein sorting 13C protein      |
| Senp5_predictec       | 57        | 186       | <b>3.23</b> | BE105606        | SUMO/sentrin specific protease 5 (predicted) ///     |
| Ube2n                 | 350       | 636       | <b>1.82</b> | BI294702        | ubiquitin-conjugating enzyme E2N (homologous         |
| Xpnpep1               | 223       | 338       | <b>1.52</b> | AI178742        | X-prolyl aminopeptidase (aminopeptidase P) 1, :      |

### Receptors & Binding proteins

| Sample          | F3-Cont | F3-Vinc | Vin/Con     | Genbank  | Gene Title                                       |
|-----------------|---------|---------|-------------|----------|--------------------------------------------------|
| Gene Symbol     | Raw     | Raw     | Ratio       | Genbank  | Gene Title                                       |
| Dlgap2          | 87      | 45      | <b>0.51</b> | BF409093 | Discs, large (Drosophila) homolog-associated pr  |
| Fnbp1           | 80      | 185     | <b>2.32</b> | BI274481 | Formin binding protein 1                         |
| Gabbr1          | 459     | 296     | <b>0.65</b> | Y10369   | Gamma-aminobutyric acid (GABA) B receptor 1      |
| Gria1           | 138     | 208     | <b>1.51</b> | BG376217 | glutamate receptor, ionotropic, AMPA1 (alpha 1)  |
| Lphn3           | 101     | 38      | <b>0.38</b> | AF081159 | Latrophilin 3                                    |
| Plxna3          | 81      | 48      | <b>0.59</b> | AW141867 | Plexin A3 (mapped)                               |
| LOC685491       | 100     | 66      | <b>0.65</b> | BF284235 | Similar to retinoblastoma binding protein 4      |
| Sort1           | 107     | 67      | <b>0.62</b> | BF394904 | Sortilin 1                                       |
| Trpm3_predicted | 116     | 71      | <b>0.61</b> | BF413661 | Transient receptor potential cation channel, sub |

### Signaling

| Sample          | F3-Cont    | F3-Vinc    | Vin/Con     | Genbank          | Gene Title                                          |
|-----------------|------------|------------|-------------|------------------|-----------------------------------------------------|
| Gene Symbol     | Raw        | Raw        | Ratio       | Genbank          | Gene Title                                          |
| <b>Abca1</b>    | <b>96</b>  | <b>157</b> | <b>1.65</b> | <b>AI502114</b>  | <b>ATP-binding cassette, sub-family A (ABC1), r</b> |
| <b>Akap5</b>    | <b>182</b> | <b>60</b>  | <b>0.33</b> | <b>NM_133515</b> | <b>A kinase (PRKA) anchor protein 5</b>             |
| Anxa4           | 68         | 105        | <b>1.55</b> | BM385237         | ZAP 36/annexin IV                                   |
| Arf6            | 110        | 73         | <b>0.66</b> | NM_024152        | ADP-ribosylation factor 6                           |
| Arhgap20        | 85         | 52         | <b>0.61</b> | BF404613         | Rho GTPase activating protein 20                    |
| Axin2           | 40         | 77         | <b>1.92</b> | NM_024355        | axin2                                               |
| Bcar1           | 58         | 87         | <b>1.50</b> | NM_012931        | breast cancer anti-estrogen resistance 1            |
| Camk2a          | 331        | 934        | <b>2.82</b> | BM384558         | calcium/calmodulin-dependent protein kinase II      |
| Camk2a          | 176        | 116        | <b>0.66</b> | BE107291         | Calcium/calmodulin-dependent protein kinase II      |
| Camk2d          | 155        | 69         | <b>0.45</b> | X77194           | calcium/calmodulin-dependent protein kinase II,     |
| Dcamk13_predict | 91         | 46         | <b>0.51</b> | AW529479         | Doublecortin and CaM kinase-like 3 (predicted)      |
| Dusp1           | 392        | 231        | <b>0.59</b> | U02553           | dual specificity phosphatase 1                      |

|                  |     |     |             |           |                                                   |
|------------------|-----|-----|-------------|-----------|---------------------------------------------------|
| Dyrk1a           | 85  | 48  | <b>0.57</b> | BI303285  | Dual-specificity tyrosine-(Y)-phosphorylation reg |
| Eps8_predicted / | 108 | 72  | <b>0.66</b> | BF393611  | Epidermal growth factor receptor pathway subst    |
| Faf1             | 165 | 254 | <b>1.54</b> | NM_130406 | Fas-associated factor 1                           |
| Gabrg3           | 119 | 75  | <b>0.63</b> | BF403919  | Gamma-aminobutyric acid (GABA) A receptor, s      |
| Gng12            | 92  | 59  | <b>0.65</b> | AI576549  | Guanine nucleotide binding protein (G protein), i |
| Gnl2             | 43  | 87  | <b>2.03</b> | AI060050  | Guanine nucleotide binding protein-like 2 (nucle  |
| Gpr153           | 91  | 53  | <b>0.58</b> | AI599549  | G protein-coupled receptor 153                    |
| Gpr88            | 273 | 140 | <b>0.51</b> | NM_031696 | G-protein coupled receptor 88                     |
| Homer1           | 144 | 69  | <b>0.48</b> | BF397258  | Homer homolog 1 (Drosophila)                      |
| Hspa1a           | 96  | 56  | <b>0.58</b> | BI278231  | heat shock 70kD protein 1A                        |
| LOC686610        | 82  | 17  | <b>0.21</b> | BF396263  | similar to transducin (beta)-like 2               |
| Plekhc1_predicte | 93  | 50  | <b>0.54</b> | BE128738  | pleckstrin homology domain containing, family C   |
| Ppp1r3c          | 189 | 115 | <b>0.61</b> | AW530361  | Protein phosphatase 1, regulatory (inhibitor) sub |
| Prkag2           | 202 | 345 | <b>1.71</b> | AI409841  | Protein kinase, AMP-activated, gamma 2 non-ca     |
| Prkag2           | 200 | 120 | <b>0.60</b> | AW527165  | Protein kinase, AMP-activated, gamma 2 non-ca     |
| Prkar1a          | 124 | 75  | <b>0.60</b> | AW524136  | protein kinase, cAMP dependent regulatory, type   |
| Prkcc            | 321 | 533 | <b>1.66</b> | NM_012628 | Protein kinase C, gamma                           |
| Prkg2            | 132 | 80  | <b>0.61</b> | NM_013012 | Protein kinase, cGMP-dependent, type II           |
| Ptprd            | 77  | 49  | <b>0.64</b> | BM392254  | Protein tyrosine phosphatase, receptor type, D    |
| Rab15            | 397 | 610 | <b>1.54</b> | BM384841  | RAB15, member RAS oncogene family                 |
| Rab3gap2         | 275 | 166 | <b>0.60</b> | AI011183  | RAB3 GTPase activating protein subunit 2          |
| RGD1306588_pr    | 112 | 75  | <b>0.67</b> | BF418962  | Similar to TBC1 domain family member 22A          |
| RGD1311455_pr    | 180 | 112 | <b>0.62</b> | BE108260  | Similar to MAPK-interacting and spindle-stabilizi |
| RGD1565261_pr    | 161 | 293 | <b>1.82</b> | AI412533  | similar to kinase non-catalytic C-lobe domain (K  |
| Ripk2_predicted  | 88  | 50  | <b>0.57</b> | BF412519  | Receptor (TNFRSF)-interacting serine-threonine    |
| Rspo1_predicted  | 92  | 56  | <b>0.61</b> | AI044916  | R-spondin homolog (Xenopus laevis) (predicted     |
| Stk32c_predictec | 495 | 291 | <b>0.59</b> | BE097305  | Serine/threonine kinase 32C (predicted)           |
| Trio             | 360 | 204 | <b>0.57</b> | AI577848  | triple functional domain (PTPRF interacting)      |
| ---              | 132 | 87  | <b>0.66</b> | AI070638  | Transcribed locus, strongly similar to NP_73375   |

### Transcription

| Sample                | F3-Cont   | F3-Vinc   | Vin/Con     | Genbank         | Gene Title                                         |
|-----------------------|-----------|-----------|-------------|-----------------|----------------------------------------------------|
| Gene Symbol           | Raw       | Raw       | Ratio       |                 |                                                    |
| <b>Ankrd12_predic</b> | <b>98</b> | <b>49</b> | <b>0.50</b> | <b>AI577496</b> | <b>ankyrin repeat domain 12 (predicted)</b>        |
| Atf2                  | 100       | 60        | <b>0.60</b> | BF288181        | Activating transcription factor 2                  |
| Baz2b_predicted       | 87        | 41        | <b>0.47</b> | BF404567        | Bromodomain adjacent to zinc finger domain, 2f     |
| Bhlhb8                | 100       | 174       | <b>1.75</b> | BE110870        | basic helix-loop-helix domain containing, class E  |
| Clasp1_predictec      | 81        | 53        | <b>0.65</b> | AI044920        | Chromodomain helicase DNA binding protein 4        |
| Cugbp2                | 131       | 68        | <b>0.52</b> | AW523660        | CUG triplet repeat, RNA binding protein 2          |
| Ddef1_predicted       | 137       | 83        | <b>0.60</b> | AA894199        | Development and differentiation enhancing (pre     |
| Ddx3x                 | 109       | 40        | <b>0.37</b> | BG667163        | DEAD (Asp-Glu-Ala-Asp) box polypeptide 3, X-I      |
| Edg2                  | 643       | 1002      | <b>1.56</b> | NM_053936       | endothelial differentiation, lysophosphatidic acid |
| Egr2                  | 144       | 82        | <b>0.57</b> | NM_053633       | early growth response 2                            |
| Epc2_predicted        | 51        | 88        | <b>1.74</b> | AI535147        | Enhancer of polycomb homolog 2 (Drosophila) (      |
| Fbxo33_predicte       | 114       | 174       | <b>1.53</b> | AW918372        | F-box only protein 33 (predicted)                  |
| Hdac1                 | 79        | 44        | <b>0.56</b> | AW530195        | Histone deacetylase 1                              |
| Hint3                 | 187       | 120       | <b>0.64</b> | AA925490        | Histidine triad nucleotide binding protein 3       |
| Ing4                  | 195       | 86        | <b>0.44</b> | BM391761        | Inhibitor of growth family, member 4               |
| LOC500030             | 78        | 155       | <b>1.99</b> | BE107536        | similar to PHD finger protein 14 isoform 1         |
| LOC685610             | 75        | 117       | <b>1.56</b> | BF551093        | similar to zinc finger protein 59                  |
| <b>LOC69142</b>       | <b>78</b> | <b>46</b> | <b>0.60</b> | <b>BF396725</b> | <b>similar to zinc finger protein 101</b>          |
| Mxi1                  | 146       | 77        | <b>0.53</b> | NM_013160       | Max interacting protein 1                          |
| Ncor1                 | 176       | 94        | <b>0.53</b> | BF390024        | nuclear receptor co-repressor 1                    |

|                  |      |     |             |           |                                                    |
|------------------|------|-----|-------------|-----------|----------------------------------------------------|
| Nfib             | 389  | 631 | <b>1.62</b> | AW253720  | Nuclear factor I/B                                 |
| Nfix             | 1335 | 454 | <b>0.34</b> | AI555855  | Nuclear factor I/X                                 |
| Pbx1_predicted   | 76   | 32  | <b>0.42</b> | BI281745  | pre-B-cell leukemia transcription factor 1 (predic |
| Poldip3_predicte | 418  | 272 | <b>0.65</b> | BF420785  | polymerase (DNA-directed), delta interacting pro   |
| RGD1307526       | 83   | 157 | <b>1.89</b> | BF397936  | Similar to modulator of estrogen induced transcr   |
| RGD1310602_pr    | 138  | 87  | <b>0.63</b> | BE105705  | Similar to ankyrin repeat domain 40                |
| Satb1            | 181  | 277 | <b>1.53</b> | AI227638  | Special AT-rich sequence binding protein 1         |
| Stx1a            | 215  | 124 | <b>0.58</b> | NM_053788 | Syntaxin 1A (brain)                                |
| Tcf20_mapped     | 108  | 170 | <b>1.57</b> | BF394639  | Transcription factor 20 (mapped)                   |
| Tnks2_predicted  | 133  | 62  | <b>0.47</b> | H32233    | Tankyrase, TRF1-interacting ankyrin-related AD     |
| Tsn              | 317  | 130 | <b>0.41</b> | BM391661  | translin                                           |
| Wasl             | 358  | 553 | <b>1.54</b> | AI706673  | Wiskott-Aldrich syndrome-like (human)              |
| Xab2             | 72   | 121 | <b>1.68</b> | AF277899  | XPA binding protein 2                              |
| Zbed3_predicted  | 89   | 55  | <b>0.62</b> | BE110658  | Zinc finger, BED domain containing 3               |
| Zc3hdc7_predict  | 143  | 88  | <b>0.62</b> | BE116569  | Zinc finger CCCH type containing 7 A (predicted    |
| Zcrb1            | 144  | 233 | <b>1.62</b> | BF386158  | Zinc finger CCHC-type and RNA binding motif 1      |
| Zfhx1b_predictec | 120  | 246 | <b>2.05</b> | BG377397  | Zinc finger homeobox 1b                            |
| Zfp533_predictec | 71   | 120 | <b>1.70</b> | AA818377  | zinc finger protein 533 (predicted)                |
| Zfpm2_predicted  | 39   | 80  | <b>2.07</b> | AI175842  | Zinc finger protein, multitype 2 (predicted)       |

### Translation and Protein Modification

| Sample           | F3-Cont | F3-Vinc | Vin/Con     | Genbank  | Gene Title                                     |
|------------------|---------|---------|-------------|----------|------------------------------------------------|
| Gene Symbol      | Raw     | Raw     | Ratio       | Genbank  | Gene Title                                     |
| LOC678972        | 83      | 50      | <b>0.61</b> | AA875047 | Chaperonin subunit 6a (zeta) (predicted)       |
| Eif5b            | 89      | 135     | <b>1.52</b> | BF395978 | Eukaryotic translation initiation factor 5B    |
| Exosc5_predicte  | 73      | 113     | <b>1.55</b> | AA943578 | Exosome component 5 (predicted)                |
| Qtrtd1_predicted | 145     | 94      | <b>0.65</b> | AA819409 | queuine tRNA-ribosyltransferase domain contain |
| Rpl3             | 875     | 1356    | <b>1.55</b> | AW142765 | ribosomal protein L3                           |
| Trmt5_predicted  | 75      | 118     | <b>1.57</b> | BF407592 | TRM5 tRNA methyltransferase 5 homolog (S. ce   |

### Miscel & Unknown

| Gene Symbol     | Raw     | Raw     | Vin/Con     | Genbank  | Gene Title                                      |
|-----------------|---------|---------|-------------|----------|-------------------------------------------------|
| Sample          | F3-Cont | F3-Vinc | Vin/Con     | Genbank  | Gene Title                                      |
| Gene Symbol     | Raw     | Raw     | Ratio       | Genbank  | Gene Title                                      |
| Gramd3          | 366     | 224     | <b>0.61</b> | C06752   | GRAM domain containing 3                        |
| LOC302898       | 218     | 340     | <b>1.56</b> | BG377487 | Ac1158                                          |
| LOC315843       | 116     | 201     | <b>1.72</b> | BE107185 | similar to WD repeat domain 11 protein          |
| LOC498014       | 106     | 61      | <b>0.58</b> | BG379949 | similar to hypothetical protein LOC284018 isofo |
| LOC500720 /// L | 313     | 201     | <b>0.64</b> | BG670822 | Non-coding RNA expressed in the brain, repeat   |
| LOC680229       | 253     | 424     | <b>1.67</b> | AI413058 | Similar to Beta-sarcoglycan (Beta-SG) (43 kDa)  |
| LOC685448       | 81      | 47      | <b>0.58</b> | AI101017 | Hypothetical protein LOC685448                  |
| LOC689176       | 183     | 120     | <b>0.65</b> | AI103213 | similar to transmembrane protein 64             |
| Lsm14a_predicte | 79      | 46      | <b>0.59</b> | BF417956 | LSM14 homolog A (SCD6, S. cerevisiae) (predic   |
| Mdn1            | 83      | 32      | <b>0.38</b> | AA956668 | Midasin homolog (yeast)                         |
| Mterfd2         | 90      | 153     | <b>1.71</b> | BI293662 | MTERF domain containing 2                       |
| RGD1304810_pr   | 81      | 54      | <b>0.66</b> | AI044301 | similar to 6430573F11Rik protein (predicted)    |
| RGD1305631_pr   | 77      | 47      | <b>0.61</b> | BF420447 | Similar to 2810437L13Rik protein (predicted)    |
| RGD1305958_pr   | 114     | 75      | <b>0.66</b> | BF408519 | Similar to BB128963 protein                     |
| RGD1306798_pr   | 106     | 170     | <b>1.61</b> | AI136405 | similar to CG15929-PA (predicted)               |
| RGD1307479_pr   | 84      | 126     | <b>1.51</b> | BG372657 | similar to KIAA1521 protein (predicted)         |
| RGD1309995_pr   | 79      | 124     | <b>1.56</b> | BF398054 | Similar to CG13957-PA (predicted)               |
| RGD1310117_pr   | 196     | 121     | <b>0.61</b> | BG381331 | Hypothetical LOC298591 (predicted)              |
| RGD1310433_pr   | 152     | 89      | <b>0.58</b> | AW254450 | Similar to mKIAA1757 protein (predicted)        |

|                      |            |            |             |                 |                                                     |
|----------------------|------------|------------|-------------|-----------------|-----------------------------------------------------|
| RGD1310651_pr        | 132        | 85         | <b>0.64</b> | BF407551        | similar to hypothetical protein MGC20460 (predi     |
| RGD1311016_pr        | 118        | 65         | <b>0.55</b> | BI281497        | similar to RIKEN cDNA 9130427A09 (predicted)        |
| RGD1312005_pr        | 224        | 137        | <b>0.61</b> | BF392349        | Similar to DD1 (predicted)                          |
| <b>RGD1559605_pr</b> | <b>107</b> | <b>260</b> | <b>2.43</b> | <b>BE101933</b> | <b>similar to hypothetical protein FLJ25477 iso</b> |
| RGD1561931_pr        | 44         | 104        | <b>2.38</b> | BF416137        | Similar to KIAA2022 protein (predicted)             |
| RGD1562278_pr        | 87         | 58         | <b>0.66</b> | BF409055        | Similar to KTSR5831 (predicted)                     |
| RGD1563912_pr        | 82         | 44         | <b>0.54</b> | BG672771        | RGD1563912 (predicted)                              |
| RGD1564084_pr        | 42         | 95         | <b>2.24</b> | BM387858        | Similar to timeless-interacting protein (predicted) |
| RGD1564451_pr        | 75         | 47         | <b>0.63</b> | BE114077        | Similar to Tribbles homolog 2 (predicted)           |
| RGD1565350_pr        | 101        | 59         | <b>0.58</b> | BF283302        | Similar to Shb protein                              |
| RGD1565498_pr        | 83         | 52         | <b>0.62</b> | BF414751        | Similar to Hypothetical protein LOC270802 (pre      |
| RGD1565556_pr        | 78         | 17         | <b>0.22</b> | BF404888        | similar to cajalin 2 isoform a (predicted)          |
| RGD1565596_pr        | 66         | 113        | <b>1.70</b> | AI072448        | Similar to Gene model 461 (predicted)               |
| RGD1565884_pr        | 153        | 79         | <b>0.52</b> | AI043817        | similar to Pellino protein homolog 2 (Pellino 2) (  |
| RGD1566117_pr        | 526        | 1101       | <b>2.09</b> | AI555865        | Similar to hypothetical protein FLJ23033 (predic    |
| Ston2_predicted      | 100        | 220        | <b>2.20</b> | AW534519        | stonin 2 (predicted)                                |
| Trim33_predictec     | 130        | 48         | <b>0.37</b> | AI103408        | tripartite motif protein 33 (predicted)             |
| Wdr66_predictec      | 48         | 78         | <b>1.62</b> | BF283420        | WD repeat domain 66 (predicted)                     |

### EST's

| Sample      | F3-Cont    | F3-Vinc   | Vin/Con     | Genbank         | Gene Title                                          |
|-------------|------------|-----------|-------------|-----------------|-----------------------------------------------------|
| Gene Symbol | Raw        | Raw       | Ratio       |                 |                                                     |
| ---         | <b>101</b> | <b>47</b> | <b>0.47</b> | <b>AA800192</b> | <b>Transcribed locus, strongly similar to XP_57</b> |
| ---         | 154        | 243       | <b>1.58</b> | AA996970        | Transcribed locus, strongly similar to NP_95466     |
| ---         | 110        | 68        | <b>0.62</b> | AI411809        | Transcribed locus                                   |
| ---         | 80         | 37        | <b>0.46</b> | BF290937        | Transcribed locus                                   |
| ---         | 90         | 57        | <b>0.63</b> | AI102735        | Transcribed locus                                   |
| ---         | 74         | 153       | <b>2.07</b> | BI282726        | Transcribed locus                                   |
| ---         | 127        | 211       | <b>1.66</b> | BM384026        | Transcribed locus                                   |
| ---         | 79         | 44        | <b>0.56</b> | BI300887        | Transcribed locus                                   |
| ---         | 71         | 115       | <b>1.63</b> | BE107482        | Transcribed locus                                   |
| ---         | 140        | 59        | <b>0.43</b> | AW531363        | Transcribed locus                                   |
| ---         | 141        | 218       | <b>1.55</b> | BE105498        | Transcribed locus                                   |
| ---         | 153        | 97        | <b>0.64</b> | AW527767        | Transcribed locus                                   |
| ---         | 138        | 72        | <b>0.52</b> | BI278180        | Transcribed locus                                   |
| ---         | 104        | 68        | <b>0.66</b> | BI293639        | Transcribed locus                                   |
| ---         | 83         | 43        | <b>0.52</b> | BG663446        | Transcribed locus                                   |
| ---         | 91         | 52        | <b>0.57</b> | AA964975        | Transcribed locus                                   |
| ---         | 242        | 366       | <b>1.51</b> | BG380796        | Transcribed locus                                   |
| ---         | 79         | 126       | <b>1.60</b> | AA926072        | <i>Transcribed locus</i>                            |
| ---         | 88         | 146       | <b>1.66</b> | BF412064        | Transcribed locus                                   |
| ---         | 449        | 712       | <b>1.58</b> | BG668719        | Transcribed locus                                   |
| ---         | 169        | 63        | <b>0.37</b> | AI102173        | Transcribed locus                                   |
| ---         | 65         | 133       | <b>2.04</b> | AW530415        | Transcribed locus                                   |
| ---         | 97         | 63        | <b>0.64</b> | BE102746        | Transcribed locus                                   |
| ---         | 190        | 287       | <b>1.51</b> | AW526127        | Transcribed locus                                   |
| ---         | 171        | 95        | <b>0.55</b> | AW914907        | Transcribed locus                                   |
| ---         | 203        | 61        | <b>0.30</b> | BF404508        | Transcribed locus                                   |
| ---         | 77         | 48        | <b>0.63</b> | AW522969        | Transcribed locus                                   |
| ---         | <b>86</b>  | <b>42</b> | <b>0.48</b> | <b>BF403875</b> | <b>Transcribed locus</b>                            |
| ---         | 293        | 187       | <b>0.64</b> | BF391580        | Transcribed locus                                   |
| ---         | 144        | 93        | <b>0.65</b> | BF555100        | Transcribed locus                                   |
| ---         | 163        | 251       | <b>1.54</b> | BF289504        | Transcribed locus                                   |

|                   |           |           |              |                 |                                              |
|-------------------|-----------|-----------|--------------|-----------------|----------------------------------------------|
| RGD621098         | 87        | 50        | <b>0.57</b>  | U92010          | Similar to RIKEN cDNA D230025D16Rik          |
| RGD1307396_pr     | 76        | 117       | <b>1.54</b>  | AW916327        | Similar to RIKEN cDNA 6330406I15 (predicted) |
| <i>RGD1310022</i> | 8         | 93        | <b>12.39</b> | <i>AI172311</i> | <i>similar to RIKEN cDNA 2610204K14</i>      |
| RGD1311358        | 80        | 46        | <b>0.58</b>  | AI012753        | similar to RIKEN cDNA 2410017P07             |
| RGD1565557_pr     | 217       | 134       | <b>0.62</b>  | AF023090        | Similar to RIKEN cDNA 2010301N04 (predicted) |
| RGD1564454_pr     | 132       | 85        | <b>0.64</b>  | BM390539        | Similar to RIKEN cDNA 2010200O16 (predicted) |
| RGD1308134_pr     | 77        | 116       | <b>1.51</b>  | BM390489        | Similar to RIKEN cDNA 1110020A23 (predicted) |
| RGD1306284_pr     | 143       | 224       | <b>1.56</b>  | AA866227        | Similar to RIKEN cDNA 1110005A03             |
| RGD:735106        | 60        | 147       | <b>2.45</b>  | AI712625        | Similar to RIKEN cDNA 0610011N22 gene        |
| ---               | 160       | 84        | <b>0.52</b>  | AW921250        | ---                                          |
| ---               | 76        | 37        | <b>0.49</b>  | BF390648        | ---                                          |
| ---               | <b>84</b> | <b>50</b> | <b>0.59</b>  | <b>BI278779</b> | ---                                          |
| ---               | 120       | 207       | <b>1.73</b>  | AI030314        | ---                                          |
| ---               | 122       | 77        | <b>0.63</b>  | AA998001        | ---                                          |
| ---               | 246       | 159       | <b>0.65</b>  | BE110241        | ---                                          |

**Note - The bolded genes are similar between male and female gene sets.**

**The italic genes are similar within the same sex between amygdala and hippocampus.**
