# Supplementary material for: Transgenerational Epigenetic Programming of the Brain Transcriptome and Anxiety Behavior
Source: PubMed Central journal article supplement (PMC2581440; doi:10.1371/journal.pone.0003745), 2008-11-18
Supplement: pone.0003745.s005.pdf [file pone.0003745.s005.pdf]

**Table S3**  
**Transgenerational Male Hippocampus Regulated Genes**

**Cell Cycle**

| Sample         | F3-Cont    | F3-Vinc    | Vin/Con     | Genbank         | Gene Title                                |
|----------------|------------|------------|-------------|-----------------|-------------------------------------------|
| Gene Synt      | Raw        | Raw        | Ratio       |                 |                                           |
| Myo1b          | 78         | 47         | <b>0.60</b> | NM_053986       | Myosin Ib                                 |
| Ogn_predic     | 106        | 53         | 0.50        | AA945955        | osteoglycin (predicted)                   |
| <b>Pcdhgc3</b> | <b>181</b> | <b>103</b> | <b>0.57</b> | <b>BE097805</b> | <b>Protocadherin gamma subfamily C, 3</b> |
| Rdx            | 99         | 66         | 0.67        | BE113016        | Radixin                                   |
| Sostdc1        | 237        | 20         | <b>0.08</b> | AA892798        | Sclerostin domain containing 1            |

**Development**

| Sample           | F3-Cont    | F3-Vinc    | Vin/Con     | Genbank         | Gene Title                                             |
|------------------|------------|------------|-------------|-----------------|--------------------------------------------------------|
| Gene Synt        | Raw        | Raw        | Ratio       |                 |                                                        |
| Chrdl1           | 103        | 67         | <b>0.65</b> | AA819658        | Chordin-like protein 1 precursor (Neuralin-1) (Ventrop |
| <b>Crim1_pre</b> | <b>128</b> | <b>221</b> | <b>1.72</b> | <b>B1289620</b> | <b>Cysteine-rich motor neuron 1 (predicted)</b>        |
| Kl               | 284        | 14         | <b>0.05</b> | BE102060        | Klotho                                                 |

**Golgi Apparatus**

| Sample    | F3-Cont | F3-Vinc | Vin/Con     | Genbank  | Gene Title                                      |
|-----------|---------|---------|-------------|----------|-------------------------------------------------|
| Gene Synt | Raw     | Raw     | Ratio       |          |                                                 |
| Ap3m1     | 79      | 51      | <b>0.65</b> | BF564312 | Adaptor-related protein complex 3, mu 1 subunit |

**Growth Factors and Cytokines**

| Sample       | F3-Cont   | F3-Vinc   | Vin/Con     | Genbank         | Gene Title                                |
|--------------|-----------|-----------|-------------|-----------------|-------------------------------------------|
| Gene Synt    | Raw       | Raw       | Ratio       |                 |                                           |
| Mdk          | 356       | 209       | <b>0.59</b> | NM_030859       | Midkine                                   |
| <b>Tgfb2</b> | <b>90</b> | <b>54</b> | <b>0.60</b> | <b>BE117736</b> | <b>Transforming growth factor, beta 2</b> |

**Immune Response**

| Sample    | F3-Cont | F3-Vinc | Vin/Con     | Genbank  | Gene Title                    |
|-----------|---------|---------|-------------|----------|-------------------------------|
| Gene Synt | Raw     | Raw     | Ratio       |          |                               |
| F5        | 124     | 14      | <b>0.11</b> | AI717113 | Coagulation factor 5 (mapped) |

**Metabolism**

| Sample       | F3-Cont     | F3-Vinc     | Vin/Con     | Genbank         | Gene Title                                             |
|--------------|-------------|-------------|-------------|-----------------|--------------------------------------------------------|
| Gene Synt    | Raw         | Raw         | Ratio       |                 |                                                        |
| Abhd14b      | 102         | 67          | <b>0.66</b> | BF409560        | Abhydrolase domain containing 14b                      |
| Acaa2        | 115         | 186         | <b>1.62</b> | NM_130433       | acetyl-Coenzyme A acyltransferase 2 (mitochondrial)    |
| <b>Acs16</b> | <b>95</b>   | <b>60</b>   | <b>0.63</b> | <b>BE105421</b> | <b>acyl-CoA synthetase long-chain family member 6</b>  |
| <b>Arg2</b>  | <b>53</b>   | <b>122</b>  | <b>2.30</b> | <b>AI574994</b> | <b>Arginase 2</b>                                      |
| Bcat1        | 855         | 468         | <b>0.55</b> | NM_017253       | Branched chain aminotransferase 1, cytosolic           |
| <b>Ptgds</b> | <b>2848</b> | <b>1566</b> | <b>0.55</b> | <b>J04488</b>   | <b>prostaglandin D2 synthase</b>                       |
| Comt         | 324         | 149         | <b>0.46</b> | NM_012531       | catechol-O-methyltransferase                           |
| Clic6        | 117         | 19          | <b>0.16</b> | BI290737        | Chloride intracellular channel 6                       |
| Cbs          | 108         | 186         | <b>1.73</b> | NM_012522       | Cystathionine beta synthase                            |
| Enpp2        | 1261        | 532         | <b>0.42</b> | NM_057104       | Ectonucleotide pyrophosphatase/phosphodiesterase 2     |
| Fntb         | 155         | 97          | <b>0.63</b> | M69056          | Farnesyltransferase, CAAX box, beta                    |
| Qpctl_predi  | 57          | 87          | <b>1.52</b> | AW521959        | Glutamyl-peptide cyclotransferase-like (predicted)     |
| Hsd17b7      | 82          | 51          | <b>0.62</b> | NM_017235       | Hydroxysteroid (17-beta) dehydrogenase 7               |
| Pex11b       | 170         | 257         | <b>1.52</b> | BG377340        | Peroxisomal biogenesis factor 11b                      |
| Pggt1b       | 169         | 110         | <b>0.65</b> | AA875190        | protein geranylgeranyltransferase type I, beta subunit |

|         |     |    |             |           |                                                         |
|---------|-----|----|-------------|-----------|---------------------------------------------------------|
| Slc13a4 | 76  | 30 | <b>0.40</b> | AI013778  | solute carrier family 13 (sodium/sulfate symporters), r |
| Slc31a1 | 100 | 61 | <b>0.61</b> | NM_133600 | Solute carrier family 31 (copper transporters), membe   |

### Proteolysis

| Sample            | F3-Cont    | F3-Vinc    | Vin/Con     | Genbank         | Gene Title                                                    |
|-------------------|------------|------------|-------------|-----------------|---------------------------------------------------------------|
| Gene Synt         | Raw        | Raw        | Ratio       |                 |                                                               |
| <i>Senp5_prec</i> | 62         | 181        | <b>2.92</b> | BE105606        | <i>SUMO/sentrin specific protease 5 (predicted) /// simil</i> |
| <b>Wsb2</b>       | <b>112</b> | <b>203</b> | <b>1.80</b> | <b>AA956464</b> | <b>WD SOCS-box protein 2</b>                                  |
| <i>Rnf6_predi</i> | <b>42</b>  | <b>108</b> | <b>2.60</b> | <b>BI296352</b> | <b>Ring finger protein (C3H2C3 type) 6 (predicted)</b>        |

### Receptors & Binding Proteins

| Sample             | F3-Cont    | F3-Vinc    | Vin/Con     | Genbank          | Gene Title                                          |
|--------------------|------------|------------|-------------|------------------|-----------------------------------------------------|
| Gene Synt          | Raw        | Raw        | Ratio       |                  |                                                     |
| Folr1              | 131        | 40         | <b>0.31</b> | AI233882         | Folate receptor 1 (adult)                           |
| Gmeb2              | 131        | 74         | <b>0.57</b> | AF205779         | Glucocorticoid modulatory element binding protein 2 |
| Hrh3               | 151        | 237        | <b>1.58</b> | NM_053506        | Histamine receptor H3                               |
| <b>Igfbp2</b>      | <b>266</b> | <b>118</b> | <b>0.44</b> | <b>NM_013122</b> | <b>Insulin-like growth factor binding protein 2</b> |
| <i>lfngr2_pred</i> | 94         | 63         | <b>0.67</b> | AI602715         | Interferon gamma receptor 2 (predicted)             |
| <b>Stxbp1</b>      | <b>207</b> | <b>128</b> | <b>0.62</b> | <b>U06069</b>    | <b>Syntaxin binding protein 1</b>                   |
| Ttr                | 4426       | 103        | <b>0.02</b> | NM_012681        | Transthyretin                                       |
| Leprot             | 76         | 50         | <b>0.66</b> | NM_020099        | leptin receptor overlapping transcript              |

### Signaling

| Sample            | F3-Cont    | F3-Vinc    | Vin/Con     | Genbank         | Gene Title                                               |
|-------------------|------------|------------|-------------|-----------------|----------------------------------------------------------|
| Gene Synt         | Raw        | Raw        | Ratio       |                 |                                                          |
| <b>Agtpbp1_p</b>  | <b>199</b> | <b>125</b> | <b>0.63</b> | <b>BF553179</b> | <b>ATP/GTP binding protein 1 (predicted)</b>             |
| <i>Akap5</i>      | 113        | 59         | <b>0.52</b> | NM_133515       | <i>A kinase (PRKA) anchor protein 5</i>                  |
| <b>Camk2a</b>     | <b>300</b> | <b>865</b> | <b>2.88</b> | <b>BM384558</b> | <b>calcium/calmodulin-dependent protein kinase II al</b> |
| Cib2              | 127        | 78         | <b>0.62</b> | BF403998        | Calcium and integrin binding family member 2             |
| <b>Cit</b>        | <b>106</b> | <b>171</b> | <b>1.61</b> | <b>AA957183</b> | <b>Citron;citron kinase</b>                              |
| <i>Hspa12a_p</i>  | 490        | 765        | <b>1.56</b> | BG670210        | Heat shock 70kDa protein 12A (predicted)                 |
| <i>Nek1_predi</i> | 98         | 49         | <b>0.50</b> | AI406369        | NIMA (never in mitosis gene a)-related expressed kin.    |
| <i>Pde9a</i>      | 80         | 157        | <b>1.97</b> | BF399743        | Phosphodiesterase 9A                                     |
| <i>Pfkm</i>       | 472        | 312        | <b>0.66</b> | BI291434        | Phosphofructokinase, muscle                              |
| <b>Plek2_prec</b> | <b>190</b> | <b>72</b>  | <b>0.38</b> | <b>AI102821</b> | <b>pleckstrin 2 (predicted)</b>                          |
| <b>Plekhh1_pi</b> | <b>90</b>  | <b>34</b>  | <b>0.38</b> | <b>BI275435</b> | <b>pleckstrin homology domain containing, family H</b>   |
| <i>Rab3b</i>      | 131        | 197        | <b>1.51</b> | NM_031091       | RAB3B, member RAS oncogene family                        |
| RGD15616:         | 117        | 68         | <b>0.58</b> | AA859909        | Similar to TBC1 domain family, member 5 (predicted)      |

### Transcription

| Sample            | F3-Cont     | F3-Vinc     | Vin/Con     | Genbank         | Gene Title                                                |
|-------------------|-------------|-------------|-------------|-----------------|-----------------------------------------------------------|
| Gene Synt         | Raw         | Raw         | Ratio       |                 |                                                           |
| <b>Dnaja4</b>     | <b>97</b>   | <b>65</b>   | <b>0.67</b> | <b>BF565278</b> | <b>DnaJ (Hsp40) homolog, subfamily A, member 4</b>        |
| <i>Fos</i>        | 97          | 58          | <b>0.60</b> | BF415939        | FBJ murine osteosarcoma viral oncogene homolog            |
| <i>Ndr1_prec</i>  | 86          | 55          | <b>0.64</b> | BE120446        | N-myc downstream regulated gene 1                         |
| <b>Nfix</b>       | <b>2495</b> | <b>1610</b> | <b>0.65</b> | <b>AI555855</b> | <b>Nuclear Factor I/X</b>                                 |
| <i>Nrip3_pred</i> | <b>342</b>  | <b>209</b>  | <b>0.61</b> | <b>BI288541</b> | <b>Nuclear receptor interacting protein 3 (predicted)</b> |
| <i>Rnf187_pre</i> | <b>131</b>  | <b>85</b>   | <b>0.65</b> | <b>AI502527</b> | <b>Ring finger protein 187 (predicted)</b>                |
| <b>LOC685374</b>  | <b>156</b>  | <b>101</b>  | <b>0.64</b> | <b>BG671371</b> | <b>Similar to ankyrin repeat domain 13c</b>               |
| <i>Smc5l1_pre</i> | 77          | 46          | <b>0.60</b> | BF419367        | SMC5 structural maintenance of chromosomes 5-like         |

### Translation

| Sample     | F3-Cont | F3-Vinc | Vin/Con      | Genbank  | Gene Title                                              |
|------------|---------|---------|--------------|----------|---------------------------------------------------------|
| Gene Symbt | Raw     | Raw     | <b>Ratio</b> |          |                                                         |
| Rae1       | 78      | 44      | <b>0.56</b>  | BF419215 | mRNA-associated protein mrnp 41 (Rae1 protein hom       |
| LOC498425  | 190     | 111     | <b>0.58</b>  | AW527413 | Similar to U2 small nuclear ribonucleoprotein auxiliary |

### Miscellaneous & Unknown

| Sample          | F3-Cont    | F3-Vinc    | Vin/Con      | Genbank         | Gene Title                                                |
|-----------------|------------|------------|--------------|-----------------|-----------------------------------------------------------|
| Gene Symbt      | Raw        | Raw        | <b>Ratio</b> |                 |                                                           |
| <b>LOC68137</b> | <b>61</b>  | <b>224</b> | <b>3.66</b>  | <b>AA944136</b> | <b>hypothetical protein LOC681371</b>                     |
| Sema3c_pr       | 200        | 130        | <b>0.65</b>  | BM390322        | sema domain, immunoglobulin domain (Ig), short bas        |
| <b>RGD13119</b> | <b>277</b> | <b>530</b> | <b>1.92</b>  | <b>BF563206</b> | <b>Similar to 6430514L14Rik protein (predicted)</b>       |
| LOC500670       | 93         | 56         | <b>0.60</b>  | BM384427        | Similar to B0511.12                                       |
| <b>RGD15596</b> | <b>104</b> | <b>244</b> | <b>2.36</b>  | <b>BE101933</b> | <b>similar to hypothetical protein FLJ25477 isoform :</b> |
| LOC309912       | 76         | 47         | <b>0.62</b>  | BM385683        | Similar to NOGO-interacting mitochondrial protein (pr     |
| <b>Tmem24</b>   | <b>332</b> | <b>512</b> | <b>1.54</b>  | <b>BG378195</b> | <b>Transmembrane protein 24</b>                           |
| Tmem38a_        | 105        | 65         | <b>0.62</b>  | BF410357        | Transmembrane protein 38a (predicted)                     |
| Vps4a           | 89         | 55         | <b>0.61</b>  | BF388609        | Vacuolar protein sorting 4a (yeast)                       |

### EST's

| Sample          | F3-Cont    | F3-Vinc    | Vin/Con      | Genbank         | Gene Title                                           |
|-----------------|------------|------------|--------------|-----------------|------------------------------------------------------|
| Gene Symbt      | Raw        | Raw        | <b>Ratio</b> |                 |                                                      |
| ---             | 574        | 366        | 0.64         | AI028809        | Similar to cDNA sequence BC006662 (predicted)        |
| <b>LOC36262</b> | <b>211</b> | <b>127</b> | <b>0.60</b>  | <b>BE096504</b> | <b>Similar to chromosome 1 open reading frame 63</b> |
| RGD13102        | 262        | 175        | <b>0.67</b>  | AI137602        | similar to chromosome 7 open reading frame 19; CAF   |
| RGD13084        | 349        | 556        | <b>1.59</b>  | AW521378        | Similar to RIKEN cDNA B130016O10 gene (predicted)    |
| ---             | <b>632</b> | <b>295</b> | <b>0.47</b>  | <b>AI179665</b> | <b>Transcribed locus</b>                             |
| ---             | 82         | 54         | <b>0.66</b>  | AI044117        | Transcribed locus                                    |
| ---             | 300        | 460        | <b>1.53</b>  | AA858791        | Transcribed locus                                    |
| ---             | <b>96</b>  | <b>56</b>  | <b>0.59</b>  | <b>BF403869</b> | <b>Transcribed locus</b>                             |
| ---             | 691        | 1326       | <b>1.92</b>  | <i>AW142765</i> | <i>Transcribed locus</i>                             |
| <b>RGD13100</b> | <b>7</b>   | <b>135</b> | <b>19.42</b> | <b>AI172311</b> | <b>Transcribed locus</b>                             |
| ---             | 79         | 133        | <b>1.69</b>  | AI146055        | Transcribed locus                                    |
| ---             | <b>323</b> | <b>603</b> | <b>1.87</b>  | <b>AI112113</b> | <b>Transcribed locus</b>                             |
| ---             | 89         | 138        | <b>1.56</b>  | BM385137        | Transcribed locus                                    |
| ---             | <b>145</b> | <b>360</b> | <b>2.49</b>  | <b>AI103530</b> | <b>Transcribed locus</b>                             |
| ---             | 112        | 60         | <b>0.54</b>  | BF386949        | Transcribed locus                                    |
| ---             | <b>138</b> | <b>217</b> | <b>1.58</b>  | <b>AA925807</b> | <b>Transcribed locus</b>                             |
| ---             | 76         | 114        | <b>1.51</b>  | <i>AA926072</i> | <i>Transcribed locus</i>                             |
| ---             | 87         | 57         | <b>0.65</b>  | BE117189        | Transcribed locus                                    |
| ---             | 139        | 68         | <b>0.49</b>  | BF403401        | Transcribed locus, moderately similar to XP_580018.  |
| RGD13098        | 125        | 75         | <b>0.60</b>  | BI288367        | Transcribed locus, strongly similar to XP_001065048. |

**Note - The bolded genes are similar between male and female gene sets.**

**The italic genes are similar within the same sex between amygdala and hippocampus.**
