# Supplementary material for: Transgenerational Epigenetic Programming of the Brain Transcriptome and Anxiety Behavior
Source: PubMed Central journal article supplement (PMC2581440; doi:10.1371/journal.pone.0003745), 2008-11-18
Supplement: pone.0003745.s006.pdf [file pone.0003745.s006.pdf]

**Table S4**  
**Transgenerational Female Amygdala Regulated Genes**

**Cytoskeleton-ECM**

| Sample      | F3-Cont | F3-Vinc | Vin/Con     | Genbank   | Gene Title_Affymetrix                                     |
|-------------|---------|---------|-------------|-----------|-----------------------------------------------------------|
| Gene Symt   | Raw     | Raw     | Ratio       |           |                                                           |
| Ncam1       | 144     | 92      | <b>0.64</b> | BF409530  | Neural cell adhesion molecule 1                           |
| Spock3_pre  | 357     | 236     | <b>0.66</b> | BG668764  | sparc/osteonectin, cwcv and kazal-like domains proteoglyc |
| <i>Eml2</i> | 70      | 110     | <b>1.58</b> | AF335571  | <i>echinoderm microtubule associated protein like 2</i>   |
| Fbln2       | 72      | 125     | <b>1.73</b> | AA944398  | fibulin 2                                                 |
| Kifap3_pre  | 80      | 52      | <b>0.65</b> | BF418109  | Kinesin-associated protein 3 (predicted)                  |
| Tpm3        | 278     | 108     | <b>0.39</b> | NM_057208 | tropomyosin 3, gamma                                      |
| Pigl        | 79      | 51      | <b>0.64</b> | D88364    | phosphatidylinositol glycan, class L                      |

**Development**

| Sample           | F3-Cont    | F3-Vinc   | Vin/Con     | Genbank         | Gene Title_Affymetrix                                    |
|------------------|------------|-----------|-------------|-----------------|----------------------------------------------------------|
| Gene Symt        | Raw        | Raw       | Ratio       |                 |                                                          |
| <b>Auts2_pre</b> | <b>139</b> | <b>60</b> | <b>0.43</b> | <b>AI070144</b> | <b>autism susceptibility candidate 2 (predicted)</b>     |
| Bai3_predic      | 81         | 52        | <b>0.64</b> | BF401684        | Brain-specific angiogenesis inhibitor 3 (predicted)      |
| Crim1_prec       | 425        | 644       | <b>1.52</b> | AI703807        | cysteine-rich motor neuron 1 (predicted)                 |
| Dlgap1           | 91         | 23        | <b>0.25</b> | BF413506        | Discs, large (Drosophila) homolog-associated protein 1   |
| Lrrc4            | 239        | 116       | <b>0.48</b> | BE105879        | leucine rich repeat containing 4 protein precursor       |
| RGD15611i        | 207        | 128       | <b>0.62</b> | BF397988        | Similar to autism susceptibility candidate 2 (predicted) |
| <i>Sncg</i>      | 374        | 653       | <b>1.74</b> | NM_031688       | <i>synuclein, gamma</i>                                  |
| Slit3            | 138        | 88        | <b>0.64</b> | NM_031321       | slit homolog 3 (Drosophila)                              |

**Epigenetics**

| Sample            | F3-Cont | F3-Vinc | Vin/Con     | Genbank  | Gene Title_Affymetrix                                          |
|-------------------|---------|---------|-------------|----------|----------------------------------------------------------------|
| Gene Symt         | Raw     | Raw     | Ratio       |          |                                                                |
| Cav2              | 126     | 57      | <b>0.45</b> | BE349669 | caveolin 2                                                     |
| <i>Chd2_pred.</i> | 94      | 56      | <b>0.59</b> | BF396633 | <i>Chromodomain helicase DNA binding protein 2 (predicted)</i> |
| Hp1bp3            | 130     | 76      | <b>0.59</b> | BF396757 | Heterochromatin protein 1, binding protein 3                   |
| LOC68292i         | 97      | 147     | <b>1.52</b> | BF557618 | <i>similar to chromatin modifying protein 1B</i>               |

**Golgi Apparatus**

| Sample    | F3-Cont | F3-Vinc | Vin/Con     | Genbank  | Gene Title_Affymetrix                                     |
|-----------|---------|---------|-------------|----------|-----------------------------------------------------------|
| Gene Symt | Raw     | Raw     | Ratio       |          |                                                           |
| RGD15605  | 94      | 143     | <b>1.52</b> | BI281965 | <i>similar to Vps41 protein (predicted)</i>               |
| Pgea1     | 59      | 92      | <b>1.55</b> | BE117101 | PKD2 interactor, golgi and endoplasmic reticulum associat |

**Growth Factors,Cyto- and Chemokines**

| Sample       | F3-Cont | F3-Vinc | Vin/Con     | Genbank   | Gene Title_Affymetrix                     |
|--------------|---------|---------|-------------|-----------|-------------------------------------------|
| Gene Symt    | Raw     | Raw     | Ratio       |           |                                           |
| Cmkor1       | 176     | 99      | <b>0.56</b> | NM_053352 | chemokine orphan receptor 1               |
| Dock9        | 98      | 59      | <b>0.60</b> | BI286269  | dedicator of cytokinesis 9                |
| <i>Tgfb2</i> | 263     | 150     | <b>0.57</b> | BE117736  | <i>Transforming growth factor, beta 2</i> |
| Negr1        | 169     | 77      | <b>0.45</b> | AW533779  | Neuronal growth regulator 1               |

**Immune Response**

| Sample    | F3-Cont | F3-Vinc | Vin/Con     | Genbank   | Gene Title_Affymetrix           |
|-----------|---------|---------|-------------|-----------|---------------------------------|
| Gene Symt | Raw     | Raw     | Ratio       |           |                                 |
| Aif1      | 103     | 155     | <b>1.51</b> | NM_017196 | allograft inflammatory factor 1 |

|                   |            |           |             |                 |                                                             |
|-------------------|------------|-----------|-------------|-----------------|-------------------------------------------------------------|
| RT1-S3            | 83         | 41        | <b>0.49</b> | AJ243974        | RT1 class Ib, locus S3                                      |
| <b>Sart2_pred</b> | <b>102</b> | <b>63</b> | <b>0.62</b> | <b>BM386930</b> | <b>Squamous cell carcinoma antigen recognized by T cell</b> |
| Xpa_predic        | 59         | 89        | <b>1.50</b> | BF554085        | xeroderma pigmentosum, complementation group A (predic      |
| RT1-Ke4           | 196        | 122       | <b>0.62</b> | BM389027        | RT1 class I, locus Ke4                                      |
| Stag1_prea        | 103        | 56        | <b>0.55</b> | AI071210        | Stromal antigen 1 (predicted)                               |

### Metabolism & Transport

| Sample     | F3-Cont | F3-Vinc | Vin/Con      | Genbank   | Gene Title_Affymetrix                                         |
|------------|---------|---------|--------------|-----------|---------------------------------------------------------------|
| Gene Symt  | Raw     | Raw     | <b>Ratio</b> |           |                                                               |
| Adk        | 123     | 188     | <b>1.52</b>  | U90340    | adenosine kinase                                              |
| Aqp4       | 66      | 127     | <b>1.93</b>  | U14007    | aquaporin 4                                                   |
| Arcn1      | 73      | 113     | <b>1.54</b>  | BF414061  | archain 1                                                     |
| Ca3        | 29      | 297     | <b>10.14</b> | AB030829  | carbonic anhydrase 3                                          |
| Chac1_pre  | 140     | 92      | <b>0.65</b>  | AI170665  | ChaC, cation transport regulator-like 1 (E. coli) (predicted) |
| Cth        | 56      | 87      | <b>1.55</b>  | NM_017074 | cystathionase (cystathionine gamma-lyase)                     |
| Kcnh1      | 98      | 37      | <b>0.38</b>  | BF394600  | Potassium voltage-gated channel, subfamily H (eag-related)    |
| LOC68480   | 112     | 59      | <b>0.52</b>  | BI273855  | similar to Probable phospholipid-transporting ATPase ID (A    |
| Pgm1       | 121     | 202     | <b>1.66</b>  | NM_017033 | phosphoglucomutase 1                                          |
| Pus7_predi | 91      | 45      | <b>0.49</b>  | BM390168  | Pseudouridylate synthase 7 homolog (S. cerevisiae) (predi     |
| Scd2       | 289     | 471     | <b>1.63</b>  | BE107760  | stearoyl-Coenzyme A desaturase 2                              |

### Proteolysis

| Sample           | F3-Cont   | F3-Vinc   | Vin/Con      | Genbank         | Gene Title_Affymetrix                                  |
|------------------|-----------|-----------|--------------|-----------------|--------------------------------------------------------|
| Gene Symt        | Raw       | Raw       | <b>Ratio</b> |                 |                                                        |
| Lap3             | 164       | 103       | <b>0.63</b>  | AA945172        | leucine aminopeptidase 3                               |
| RGD15638         | 269       | 163       | <b>0.60</b>  | AI180403        | similar to cullin 4A (predicted)                       |
| <b>Rnf6_pred</b> | <b>24</b> | <b>99</b> | <b>4.09</b>  | <b>BI296352</b> | <b>ring finger protein (C3H2C3 type) 6 (predicted)</b> |
| RGD15607         | 170       | 101       | <b>0.60</b>  | BF396481        | Similar to ring finger protein 111 (predicted)         |
| Usp47_pre        | 82        | 137       | <b>1.68</b>  | AI407830        | ubiquitin specific protease 47 (predicted)             |

### Receptors & Binding Proteins

| Sample       | F3-Cont   | F3-Vinc    | Vin/Con      | Genbank         | Gene Title_Affymetrix                                      |
|--------------|-----------|------------|--------------|-----------------|------------------------------------------------------------|
| Gene Symt    | Raw       | Raw        | <b>Ratio</b> |                 |                                                            |
| <b>Abca1</b> | <b>76</b> | <b>174</b> | <b>2.30</b>  | <b>AI502114</b> | <b>ATP-binding cassette, sub-family A (ABC1), member 1</b> |
| Abca3        | 77        | 116        | <b>1.51</b>  | BF546340        | ATP-binding cassette, sub-family A (ABC1), member 3        |
| Gabbr1       | 86        | 56         | <b>0.65</b>  | BF410498        | Gamma-aminobutyric acid (GABA) B receptor 1                |

### Signaling

| Sample       | F3-Cont    | F3-Vinc    | Vin/Con      | Genbank          | Gene Title_Affymetrix                                        |
|--------------|------------|------------|--------------|------------------|--------------------------------------------------------------|
| Gene Symt    | Raw        | Raw        | <b>Ratio</b> |                  |                                                              |
| <b>Akap5</b> | <b>215</b> | <b>102</b> | <b>0.48</b>  | <b>NM_133515</b> | <b>A kinase (PRKA) anchor protein 5</b>                      |
| Cnksr3       | 80         | 52         | <b>0.65</b>  | AW253242         | Cnksr family member 3                                        |
| Dusp8_pre    | 83         | 48         | <b>0.58</b>  | AW528387         | dual specificity phosphatase 8 (predicted)                   |
| Farp1_pred   | 48         | 83         | <b>1.73</b>  | AI058490         | FERM, RhoGEF (Arhgef) and pleckstrin domain protein 1 (      |
| Git2         | 123        | 69         | <b>0.56</b>  | BF402645         | G protein-coupled receptor kinase-interactor 2               |
| Grik5        | 100        | 60         | <b>0.60</b>  | BF404569         | Glutamate receptor, ionotropic, kainate 5                    |
| Herpud1      | 293        | 191        | <b>0.65</b>  | NM_053523        | homocysteine-inducible, endoplasmic reticulum stress-indu    |
| Itfg3        | 108        | 69         | <b>0.64</b>  | AA799854         | integrin alpha FG-GAP repeat containing 3                    |
| Itgb8_predi  | 193        | 114        | <b>0.59</b>  | BG668993         | Integrin beta 8 (predicted)                                  |
| Itgb8_predi  | 362        | 204        | <b>0.56</b>  | AI502837         | Integrin beta 8 (predicted)                                  |
| LOC68444     | 144        | 265        | <b>1.84</b>  | BE106252         | similar to Peptidyl-prolyl cis-trans isomerase NIMA-interact |
| Nek1_predi   | 126        | 76         | <b>0.61</b>  | AI406369         | NIMA (never in mitosis gene a)-related expressed kinase 1    |
| Ntrk2        | 122        | 74         | <b>0.61</b>  | BF386266         | Neurotrophic tyrosine kinase, receptor, type 2               |

|                   |     |     |             |           |                                                                   |
|-------------------|-----|-----|-------------|-----------|-------------------------------------------------------------------|
| <i>Plekhb2_pr</i> | 41  | 88  | <b>2.13</b> | AW254369  | <i>pleckstrin homology domain containing, family B (evectins)</i> |
| <i>Ppp2r1b</i>    | 58  | 106 | <b>1.84</b> | AI411788  | protein phosphatase 2 (formerly 2A), regulatory subunit A (       |
| <i>Ppp3ca</i>     | 282 | 146 | <b>0.52</b> | AI145507  | Protein phosphatase 3, catalytic subunit, alpha isoform           |
| <i>Ppp3ca</i>     | 69  | 112 | <b>1.63</b> | BF388224  | <i>Protein phosphatase 3, catalytic subunit, alpha isoform</i>    |
| <i>Ppp6c</i>      | 102 | 158 | <b>1.56</b> | NM_133589 | protein phosphatase 6, catalytic subunit                          |
| <i>Prkce</i>      | 101 | 45  | <b>0.45</b> | BI301465  | <i>Protein kinase C, epsilon</i>                                  |
| <i>Prkwnk1</i>    | 138 | 74  | <b>0.54</b> | AI714037  | Protein kinase, lysine deficient 1                                |
| <i>Ptprij</i>     | 376 | 182 | <b>0.48</b> | NM_017269 | <i>protein tyrosine phosphatase, receptor type, J</i>             |
| <i>Ralgds</i>     | 181 | 119 | <b>0.66</b> | NM_019250 | ral guanine nucleotide dissociation stimulator                    |
| RGD13072          | 85  | 44  | <b>0.52</b> | BF391396  | Similar to protein kinase, lysine deficient 1; kinase deficient   |
| RGD15616          | 110 | 49  | <b>0.44</b> | AW534457  | Similar to nemo like kinase (predicted)                           |
| <i>RICS_pred.</i> | 758 | 489 | <b>0.65</b> | BE097238  | <i>RhoGAP involved in beta-catenin-N-cadherin and NMDA re</i>     |

### Transcription

| Sample              | F3-Cont | F3-Vinc | Vin/Con      | Genbank   | Gene Title_Affymetrix                                             |
|---------------------|---------|---------|--------------|-----------|-------------------------------------------------------------------|
| Gene Symt           | Raw     | Raw     | <b>Ratio</b> | Genbank   | Gene Title_Affymetrix                                             |
| <i>Baz1b</i>        | 111     | 63      | <b>0.57</b>  | BF395914  | Bromodomain adjacent to zinc finger domain protein 1B             |
| <i>Bcl11b_pre</i>   | 513     | 227     | <b>0.44</b>  | BM390227  | B-cell leukemia/lymphoma 11B (predicted)                          |
| <i>Foxo1a</i>       | 128     | 85      | <b>0.66</b>  | BF406350  | Forkhead box O1A                                                  |
| <i>Klf5</i>         | 63      | 104     | <b>1.66</b>  | NM_053394 | Kruppel-like factor 5                                             |
| LOC500430           | 56      | 90      | <b>1.61</b>  | BF391635  | similar to ankyrin repeat domain 6                                |
| LOC690667           | 91      | 60      | <b>0.67</b>  | BF398283  | Similar to zinc finger protein 40                                 |
| <i>Mll</i>          | 518     | 307     | <b>0.59</b>  | BE114473  | myeloid/lymphoid or mixed-lineage leukemia                        |
| <i>Mllt10</i>       | 82      | 50      | <b>0.60</b>  | BF396749  | myeloid/lymphoid or mixed-lineage leukemia (trithorax hom         |
| <i>NIPBL</i>        | 104     | 61      | <b>0.59</b>  | AA963592  | Nipped-B homolog (Drosophila)                                     |
| <i>RGD15631</i>     | 1396    | 2493    | <b>1.79</b>  | BE104219  | <i>similar to MADS box transcription enhancer factor 2, polyp</i> |
| <i>Wiz_predicti</i> | 131     | 70      | <b>0.53</b>  | H31790    | widely-interspaced zinc finger motifs (predicted)                 |
| <i>Crebl2</i>       | 93      | 233     | <b>2.51</b>  | BE102391  | <i>cAMP responsive element binding protein-like 2</i>             |

### Translation & Protein Modification

| Sample              | F3-Cont | F3-Vinc | Vin/Con      | Genbank  | Gene Title_Affymetrix                                             |
|---------------------|---------|---------|--------------|----------|-------------------------------------------------------------------|
| Gene Symt           | Raw     | Raw     | <b>Ratio</b> | Genbank  | Gene Title_Affymetrix                                             |
| <i>Arf4l_predic</i> | 78      | 28      | <b>0.36</b>  | AI030650 | ADP-ribosylation factor 4-like (predicted)                        |
| <i>Brunol4_pr</i>   | 195     | 117     | <b>0.60</b>  | AW524497 | <i>Bruno-like 4, RNA binding protein (Drosophila) (predicted)</i> |
| <i>Eif3s6ip</i>     | 89      | 146     | <b>1.64</b>  | BF420467 | eukaryotic translation initiation factor 3, subunit 6 interactin  |

### Miscellaneous & Unknown

| Sample            | F3-Cont    | F3-Vinc    | Vin/Con      | Genbank         | Gene Title_Affymetrix                                          |
|-------------------|------------|------------|--------------|-----------------|----------------------------------------------------------------|
| Gene Symt         | Raw        | Raw        | <b>Ratio</b> | Genbank         | Gene Title_Affymetrix                                          |
| <i>Gramd1b_p</i>  | 117        | 78         | <b>0.67</b>  | AI175700        | GRAM domain containing 1B (predicted)                          |
| <i>Lce1f_pred</i> | 176        | 98         | <b>0.56</b>  | BI281143        | late cornified envelope 1F (predicted) /// RGD1561089 (pre     |
| LOC313672         | 78         | 47         | <b>0.60</b>  | BF415778        | Similar to CG11206-PA                                          |
| LOC683334         | 78         | 49         | <b>0.63</b>  | AI058900        | hypothetical protein LOC683334 /// hypothetical protein LO     |
| LOC690777         | 42         | 101        | <b>2.39</b>  | BF404935        | Similar to RUN and FYVE domain-containing 2                    |
| <i>Qser1_prec</i> | 135        | 87         | <b>0.64</b>  | AA800519        | Glutamine and serine rich 1 (predicted)                        |
| RGD13061          | 78         | 46         | <b>0.59</b>  | AI071962        | similar to predicted CDS, putative protein of bilateral origin |
| RGD13065          | 140        | 91         | <b>0.65</b>  | AI577870        | similar to Protein C22orf5                                     |
| <i>RGD13079</i>   | 148        | 88         | <b>0.60</b>  | AI146080        | <i>similar to hypothetical protein FLJ14681 (predicted)</i>    |
| RGD13087          | 89         | 51         | <b>0.58</b>  | BE107410        | similar to KIAA0892 protein (predicted)                        |
| <b>RGD15596</b>   | <b>195</b> | <b>383</b> | <b>1.96</b>  | <b>BE101933</b> | <b>Similar to hypothetical protein FLJ25477 isoform 2 (pre</b> |
| RGD15619          | 489        | 238        | <b>0.49</b>  | AA848540        | Similar to IQ motif and WD repeats 1 (predicted)               |
| <i>RGD15624</i>   | 112        | 174        | <b>1.56</b>  | BG665671        | <i>similar to WAC (predicted)</i>                              |
| RGD15644          | 220        | 370        | <b>1.68</b>  | AW915035        | RGD1564450 (predicted)                                         |

|         |     |     |             |          |                                                            |
|---------|-----|-----|-------------|----------|------------------------------------------------------------|
| Serinc3 | 83  | 50  | <b>0.60</b> | BE120228 | Serine incorporator 3                                      |
| ---     | 80  | 47  | <b>0.59</b> | BE108371 | Transcribed locus, weakly similar to XP_341406.2 similar 1 |
| ---     | 153 | 90  | <b>0.59</b> | BF544149 | Transcribed locus, strongly similar to XP_001058170.1 hy   |
| ---     | 104 | 66  | <b>0.64</b> | BF408769 | Transcribed locus, strongly similar to XP_347025.2 hypoth  |
| ---     | 396 | 257 | <b>0.65</b> | AI029275 | Transcribed locus, weakly similar to XP_001054001.1 sim    |

### EST's

| Sample          | F3-Cont    | F3-Vinc    | Vin/Con      | Genbank         | Gene Title_Affymetrix                                    |
|-----------------|------------|------------|--------------|-----------------|----------------------------------------------------------|
| Gene Symt       | Raw        | Raw        | Ratio        |                 |                                                          |
| <i>RGD15609</i> | 6          | 178        | <b>27.85</b> | AA799328        | similar to expressed sequence AW413625 (predicted)       |
| <i>RGD13118</i> | 78         | 119        | <b>1.53</b>  | BI284801        | similar to RIKEN cDNA 1110021N07                         |
| <i>RGD13053</i> | 77         | 50         | <b>0.65</b>  | BF401603        | similar to RIKEN cDNA 492151116                          |
| <i>RGD13057</i> | 511        | 318        | <b>0.62</b>  | AI179665        | Similar to RIKEN cDNA 5033406L14                         |
| <i>RGD13060</i> | 83         | 36         | <b>0.43</b>  | AW916721        | similar to RIKEN cDNA A630054L15; hypothetical protein M |
| <i>RGD13109</i> | 103        | 55         | <b>0.54</b>  | BE116091        | similar to RIKEN cDNA E130308A19 (predicted)             |
| ---             | 207        | 130        | <b>0.63</b>  | BE103273        | Transcribed locus                                        |
| ---             | <b>89</b>  | <b>152</b> | <b>1.70</b>  | <b>BF406304</b> | <b>Transcribed locus</b>                                 |
| ---             | <b>232</b> | <b>139</b> | <b>0.60</b>  | <b>BE121006</b> | <b>Transcribed locus</b>                                 |
| ---             | <b>141</b> | <b>47</b>  | <b>0.33</b>  | <b>BF403875</b> | <b>Transcribed locus</b>                                 |
| ---             | <b>137</b> | <b>85</b>  | <b>0.62</b>  | <b>BI278779</b> | <b>Transcribed locus</b>                                 |
| ---             | 172        | 86         | <b>0.50</b>  | AI102821        | Transcribed locus                                        |
| ---             | 160        | 84         | <b>0.52</b>  | AI070489        | Transcribed locus                                        |
| ---             | 154        | 351        | <b>2.27</b>  | AI103530        | Transcribed locus                                        |
| ---             | 231        | 139        | <b>0.60</b>  | BI278952        | Transcribed locus                                        |
| ---             | 109        | 299        | <b>2.76</b>  | AA944136        | Transcribed locus                                        |
| ---             | 63         | 106        | <b>1.70</b>  | BE110067        | Transcribed locus                                        |
| ---             | 76         | 137        | <b>1.79</b>  | AA899937        | Transcribed locus                                        |
| ---             | <b>84</b>  | <b>50</b>  | <b>0.59</b>  | <b>BF396725</b> | <b>Transcribed locus</b>                                 |
| ---             | 120        | 200        | <b>1.66</b>  | BF545930        | Transcribed locus                                        |
| ---             | 65         | 106        | <b>1.63</b>  | BE120930        | Transcribed locus                                        |
| ---             | 88         | 47         | <b>0.54</b>  | BG672252        | Transcribed locus                                        |
| ---             | 109        | 71         | <b>0.65</b>  | BI286900        | Transcribed locus                                        |
| ---             | 402        | 645        | <b>1.60</b>  | AI575082        | Transcribed locus                                        |
| ---             | 104        | 36         | <b>0.35</b>  | BE097725        | Transcribed locus                                        |
| ---             | 137        | 82         | <b>0.60</b>  | BF402566        | Transcribed locus                                        |
| ---             | 180        | 101        | <b>0.56</b>  | BF399309        | Transcribed locus                                        |
| ---             | 82         | 52         | <b>0.64</b>  | BF391128        | Transcribed locus                                        |
| ---             | 200        | 101        | <b>0.50</b>  | AA996491        | Transcribed locus                                        |
| ---             | 78         | 43         | <b>0.55</b>  | BF547003        | Transcribed locus                                        |
| ---             | 243        | 150        | <b>0.62</b>  | AA926109        | Transcribed locus                                        |
| ---             | 120        | 78         | <b>0.66</b>  | AA859319        | Transcribed locus                                        |
| ---             | 115        | 70         | <b>0.60</b>  | AW528823        | Transcribed locus                                        |
| ---             | 212        | 122        | <b>0.58</b>  | AI145015        | Transcribed locus                                        |
| ---             | 120        | 72         | <b>0.60</b>  | AI137306        | Transcribed locus                                        |
| ---             | 361        | 211        | <b>0.58</b>  | BE107458        | Transcribed locus                                        |
| ---             | 80         | 42         | <b>0.52</b>  | BF418643        | Transcribed locus                                        |
| ---             | 91         | 59         | <b>0.65</b>  | BF409564        | Transcribed locus                                        |
| ---             | 112        | 66         | <b>0.59</b>  | BF394244        | Transcribed locus                                        |
| ---             | 113        | 75         | <b>0.67</b>  | AI101372        | Transcribed locus                                        |
| ---             | 133        | 201        | <b>1.52</b>  | AA944179        | Transcribed locus                                        |
| ---             | 122        | 80         | <b>0.65</b>  | AW535602        | ---                                                      |
| ---             | <b>76</b>  | <b>44</b>  | <b>0.57</b>  | <b>AA800192</b> | ---                                                      |
| ---             | 117        | 53         | <b>0.46</b>  | FX_ratb1/X12!   | ---                                                      |

|     |            |            |             |                 |     |
|-----|------------|------------|-------------|-----------------|-----|
| --- | 80         | 46         | <b>0.57</b> | AA875617        | --- |
| --- | <b>137</b> | <b>79</b>  | <b>0.57</b> | <b>AI577496</b> | --- |
| --- | 765        | 400        | <b>0.52</b> | NM_053584       | --- |
| --- | 100        | 152        | <b>1.52</b> | AI764288        | --- |
| --- | 153        | 97         | <b>0.63</b> | AI236099        | --- |
| --- | 350        | 233        | <b>0.66</b> | BF388125        | --- |
| --- | 107        | 47         | <b>0.44</b> | H31323          | --- |
| --- | 77         | 29         | <b>0.38</b> | BF405788        | --- |
| --- | 203        | 341        | <b>1.68</b> | BG671050        | --- |
| --- | 90         | 51         | <b>0.57</b> | BF564798        | --- |
| --- | 78         | 41         | <b>0.53</b> | AW919386        | --- |
| --- | 38         | 78         | <b>2.06</b> | <i>BI288579</i> | --- |
| --- | 231        | 153        | <b>0.66</b> | BG380566        | --- |
| --- | 154        | 96         | <b>0.62</b> | BF399576        | --- |
| --- | 301        | 169        | <b>0.56</b> | AI176695        | --- |
| --- | 394        | 246        | <b>0.63</b> | AI059929        | --- |
| --- | 3571       | 2335       | <b>0.65</b> | AI008646        | --- |
| --- | <i>174</i> | <i>100</i> | <b>0.57</b> | <i>BF410240</i> | --- |
| --- | 82         | 39         | <b>0.48</b> | AI013683        | --- |

**Note - The bolded genes are similar between male and female gene sets.  
The italic genes are similar within the same sex between amygdala and hippocampus.**
