# Supplementary material for: Transgenerational Epigenetic Programming of the Brain Transcriptome and Anxiety Behavior
Source: PubMed Central journal article supplement (PMC2581440; doi:10.1371/journal.pone.0003745), 2008-11-18
Supplement: pone.0003745.s007.pdf [file pone.0003745.s007.pdf]

**Table S5**  
**Transgenerational Female Hippocampus Regulated Genes**

| <b>Apoptosis</b> |         |         |             |           |                                                          |
|------------------|---------|---------|-------------|-----------|----------------------------------------------------------|
| Sample           | F3-Cont | F3-Vinc | Vin/Con     | Genbank   | Gene Title                                               |
| Gene Symbol      | Raw     | Raw     | Ratio       |           |                                                          |
| Bag3             | 163     | 103     | <b>0.63</b> | AI231792  | Bcl2-associated athanogene 3                             |
| Cbl27            | 16      | 160     | <b>9.99</b> | AF275151  | androgen receptor-related apoptosis-associated protein   |
| Dapk1_predicte   | 55      | 149     | <b>2.69</b> | BI281823  | death associated protein kinase 1 (predicted)            |
| Faim2            | 278     | 425     | <b>1.53</b> | AF044201  | Fas apoptotic inhibitory molecule 2                      |
| Pdcd6ip          | 457     | 706     | <b>1.54</b> | BF389407  | programmed cell death 6 interacting protein              |
| RGD1306214_r     | 19      | 100     | <b>5.32</b> | BE107277  | similar to TGF-beta induced apoptosis protein 2 (predict |
| Tegt             | 358     | 559     | <b>1.56</b> | NM_019381 | testis enhanced gene transcript (Bax inhibitor-1)        |

| <b>Cell Cycle</b> |         |         |              |           |                                                              |
|-------------------|---------|---------|--------------|-----------|--------------------------------------------------------------|
| Sample            | F3-Cont | F3-Vinc | Vin/Con      | Genbank   | Gene Title                                                   |
| Gene Symbol       | Raw     | Raw     | Ratio        |           |                                                              |
| Ccnd1             | 66      | 176     | <b>2.67</b>  | BI295861  | cyclin D1                                                    |
| Ccnd2             | 41      | 546     | <b>13.21</b> | L09752    | cyclin D2                                                    |
| Ccnd3             | 87      | 139     | <b>1.60</b>  | NM_012766 | cyclin D3                                                    |
| Cdc2l5            | 65      | 153     | <b>2.37</b>  | AI170800  | cell division cycle 2-like 5 (cholinesterase-related cell di |
| Cdc2l6_predicte   | 275     | 480     | <b>1.75</b>  | BG376309  | cell division cycle 2-like 6 (CDK8-like) (predicted)         |
| Cdkn1c            | 66      | 105     | <b>1.59</b>  | AI013919  | cyclin-dependent kinase inhibitor 1C (P57)                   |
| Ddb1              | 53      | 245     | <b>4.58</b>  | AJ277077  | damage-specific DNA binding protein 1                        |
| Dab2              | 117     | 207     | <b>1.77</b>  | NM_024159 | disabled homolog 2 (Drosophila)                              |
| Gas6              | 156     | 541     | <b>3.47</b>  | NM_057100 | growth arrest specific 6                                     |
| Numa1             | 100     | 168     | <b>1.67</b>  | AI599394  | nuclear mitotic apparatus protein 1                          |
| RGD1560358_r      | 75      | 381     | <b>5.11</b>  | AW534965  | similar to cell division cycle and apoptosis regulator 1 (j  |
| Unc5b             | 54      | 108     | <b>1.98</b>  | BI303989  | Unc-5 homolog B (C. elegans)                                 |

| <b>Cytoskeleton-ECM</b> |         |         |              |           |                                                          |
|-------------------------|---------|---------|--------------|-----------|----------------------------------------------------------|
| Sample                  | F3-Cont | F3-Vinc | Vin/Con      | Genbank   | Gene Title                                               |
| Gene Symbol             | Raw     | Raw     | Ratio        |           |                                                          |
| Actb                    | 1427    | 3416    | <b>2.39</b>  | NM_031144 | actin, beta                                              |
| Add1                    | 60      | 176     | <b>2.95</b>  | NM_016990 | adducin 1 (alpha)                                        |
| Add3                    | 46      | 269     | <b>5.82</b>  | AI407835  | adducin 3 (gamma)                                        |
| App                     | 723     | 1257    | <b>1.74</b>  | BM986220  | amyloid beta (A4) precursor protein                      |
| Actr1a_predicte         | 170     | 292     | <b>1.71</b>  | BI294346  | ARP1 actin-related protein 1 homolog A (yeast) (predic   |
| Actr2                   | 1025    | 3030    | <b>2.96</b>  | BE107525  | ARP2 actin-related protein 2 homolog (yeast)             |
| Cdh13                   | 139     | 525     | <b>3.78</b>  | BG381748  | cadherin 13                                              |
| Cdh2                    | 147     | 230     | <b>1.56</b>  | AF097593  | cadherin 2                                               |
| Cdh22                   | 36      | 526     | <b>14.68</b> | NM_019161 | cadherin 22                                              |
| Chl1                    | 211     | 848     | <b>4.02</b>  | BF524215  | cell adhesion molecule with homology to L1CAM            |
| Cspg5                   | 33      | 99      | <b>3.00</b>  | AF292102  | chondroitin sulfate proteoglycan 5                       |
| Cotl1_predicted         | 434     | 283     | <b>0.65</b>  | AI411057  | coactosin-like 1 (Dictyostelium) (predicted)             |
| Cntn1                   | 82      | 127     | <b>1.56</b>  | NM_057118 | contactin 1                                              |
| Coro1c_predictr         | 23      | 91      | <b>3.86</b>  | BE120171  | coronin, actin binding protein 1C (predicted)            |
| Cttn                    | 25      | 112     | <b>4.45</b>  | AF054618  | cortactin                                                |
| Dcn                     | 142     | 230     | <b>1.61</b>  | BM390253  | decorin                                                  |
| Dstn                    | 305     | 483     | <b>1.58</b>  | AI170442  | destrin                                                  |
| Dpy19l1_predic          | 145     | 315     | <b>2.18</b>  | BI296653  | dpy-19-like 1 (C. elegans) (predicted)                   |
| Dbn1                    | 978     | 551     | <b>0.56</b>  | NM_031024 | drebrin 1                                                |
| Dctn3_predicter         | 614     | 1050    | <b>1.71</b>  | AA893211  | dynactin 3 (predicted)                                   |
| Dst_predicted           | 72      | 162     | <b>2.25</b>  | AI235468  | dystonin (predicted)                                     |
| Dtna_predicted          | 458     | 878     | <b>1.92</b>  | BF396607  | dystrobrevin alpha (predicted)                           |
| Dag1                    | 52      | 138     | <b>2.65</b>  | AW251326  | dystroglycan 1                                           |
| Eml2                    | 6       | 115     | <b>17.88</b> | AF335571  | <i>echinoderm microtubule associated protein like 2</i>  |
| Eml4_predicted          | 146     | 91      | <b>0.63</b>  | BE111290  | echinoderm microtubule associated protein like 4 (pred   |
| Enc1                    | 20      | 100     | <b>4.90</b>  | AA997271  | Ectodermal-neural cortex 1                               |
| Epn2                    | 40      | 88      | <b>2.21</b>  | NM_021852 | epsin 2                                                  |
| Epb4.1l3                | 133     | 202     | <b>1.52</b>  | AB032828  | erythrocyte protein band 4.1-like 3                      |
| Epb4.1l4a_pred          | 161     | 106     | <b>0.66</b>  | BE100811  | erythrocyte protein band 4.1-like 4a (predicted)         |
| Fndc3b_predict          | 22      | 115     | <b>5.22</b>  | AI176320  | fibronectin type III domain containing 3B (predicted)    |
| Gpiap1                  | 108     | 216     | <b>2.00</b>  | BF546337  | GPI-anchored membrane protein 1                          |
| Hook3                   | 74      | 113     | <b>1.53</b>  | AI501458  | hook homolog 3 (Drosophila)                              |
| Icam5_predicte          | 134     | 346     | <b>2.58</b>  | BE102418  | intercellular adhesion molecule 5, telencephalin (predic |
| Kif1b                   | 65      | 285     | <b>4.42</b>  | AB070355  | kinesin family member 1B                                 |
| Kif3a                   | 29      | 122     | <b>4.22</b>  | BF397677  | kinesin family member 3a                                 |
| Kif5a                   | 45      | 85      | <b>1.88</b>  | BF408765  | kinesin family member 5A                                 |

|                        |           |            |             |                 |                                                           |
|------------------------|-----------|------------|-------------|-----------------|-----------------------------------------------------------|
| Kif5c_predicted        | 21        | 148        | 7.17        | BE104278        | kinesin family member 5C (predicted)                      |
| KIFC2                  | 541       | 332        | 0.61        | AW433953        | kinesin family member C2                                  |
| Klc1                   | 53        | 246        | 4.65        | AI576961        | kinesin light chain 1                                     |
| Kifap3_predicte        | 16        | 187        | 11.78       | AI227800        | kinesin-associated protein 3 (predicted)                  |
| Lgals8                 | 57        | 90         | 1.57        | NM_053862       | lectin, galactoside-binding, soluble 8                    |
| Lrln3_predicted        | 58        | 89         | 1.55        | BE101066        | leucine rich repeat and fibronectin type III domain conta |
| Map1lc3a               | 739       | 448        | 0.61        | AI177372        | microtubule-associated protein 1 light chain 3 alpha      |
| Map1lc3b               | 276       | 418        | 1.52        | AI233190        | microtubule-associated protein 1 light chain 3 beta       |
| Map1b                  | 171       | 625        | 3.67        | BG672052        | microtubule-associated protein 1b                         |
| Mtap2                  | 19        | 259        | 13.31       | X74211          | microtubule-associated protein 2                          |
| Mtap7_predicte         | 347       | 191        | 0.55        | BG374192        | Microtubule-associated protein 7 (predicted)              |
| Mapre1                 | 74        | 157        | 2.13        | U75920          | microtubule-associated protein, RP/EB family, member      |
| Mtmr4_predicte         | 77        | 137        | 1.78        | AI178892        | myotubularin related protein 4 (predicted)                |
| Mtmr9                  | 109       | 411        | 3.77        | BE111884        | myotubularin related protein 9                            |
| LOC294446 /// I        | 85        | 156        | 1.84        | M59859          | myristoylated alanine rich protein kinase C substrate /// |
| Ncam1                  | 275       | 427        | 1.56        | AI409738        | Neural cell adhesion molecule 1                           |
| Hnt                    | 172       | 791        | 4.60        | NM_017354       | neurotrimin                                               |
| Opcml                  | 551       | 1095       | 1.99        | M88709          | opioid binding protein/cell adhesion molecule-like        |
| Pclo                   | 27        | 80         | 3.01        | AF138789        | piccolo (presynaptic cytomatrix protein)                  |
| Pkp4_predicted         | 54        | 153        | 2.83        | AA819847        | plakophilin 4 (predicted)                                 |
| Podxl2_predicte        | 149       | 97         | 0.65        | BI276946        | podocalyxin-like 2 (predicted)                            |
| Col1a2                 | 42        | 125        | 3.00        | BM388837        | procollagen, type I, alpha 2                              |
| Col11a2                | 92        | 56         | 0.61        | BM391350        | procollagen, type XI, alpha 2                             |
| Pfn2                   | 255       | 446        | 1.75        | AF228737        | profilin 2                                                |
| Pcdh17_predict         | 47        | 364        | 7.68        | BF558981        | protocadherin 17 (predicted)                              |
| Pcdh19_predict         | 76        | 227        | 2.97        | AA997710        | protocadherin 19 (predicted)                              |
| Pcdh7                  | 38        | 97         | 2.54        | AA956340        | Protocadherin 7                                           |
| Pcdha13                | 12        | 76         | 6.27        | AW524833        | protocadherin alpha 13                                    |
| <b>Pcdhga1 /// Pcd</b> | <b>25</b> | <b>174</b> | <b>7.00</b> | <b>BE097805</b> | <b>protocadherin gamma subfamily C, 3 /// protocadher</b> |
| Rdx                    | 50        | 131        | 2.62        | AW527313        | radixin                                                   |
| Rsn                    | 54        | 110        | 2.03        | NM_031745       | restin (Reed-Steinberg cell-expressed intermediate filar  |
| Sparc                  | 698       | 458        | 0.66        | NM_012656       | secreted acidic cysteine rich glycoprotein                |
| Srrm2_predicte         | 143       | 908        | 6.33        | BF408990        | serine/arginine repetitive matrix 2 (predicted)           |
| LOC679221              | 279       | 432        | 1.55        | AA859614        | similar to Microtubule-associated protein RP/EB family    |
| Spnb2                  | 123       | 342        | 2.78        | BF559566        | Spectrin beta 2                                           |
| Spire1_predicte        | 117       | 182        | 1.55        | BM387505        | spire homolog 1 (Drosophila) (predicted)                  |
| Stmn4                  | 465       | 713        | 1.53        | AF026530        | stathmin-like 4                                           |
| Smap1l                 | 79        | 141        | 1.79        | BE097445        | stromal membrane-associated protein 1-like                |
| Sv2a                   | 355       | 678        | 1.91        | NM_057210       | synaptic vesicle glycoprotein 2a                          |
| Sv2b                   | 156       | 364        | 2.34        | L10362          | synaptic vesicle glycoprotein 2b                          |
| Tnr                    | 34        | 229        | 6.80        | NM_013045       | tenascin R                                                |
| Tspan5                 | 42        | 88         | 2.10        | AW251317        | tetraspanin 5                                             |
| Tmsb10                 | 1044      | 636        | 0.61        | NM_021261       | thymosin, beta 10                                         |
| Tmod2                  | 110       | 327        | 2.98        | BF567833        | tropomodulin 2                                            |
| Tpm1                   | 178       | 280        | 1.57        | M34135          | tropomyosin 1, alpha                                      |
| Tpm3                   | 735       | 472        | 0.64        | AI071098        | tropomyosin 3, gamma                                      |
| Vcpi1                  | 56        | 300        | 5.37        | BM383657        | valosin containing protein (p97)/p47 complex interactin   |
| Vamp1                  | 20        | 95         | 4.79        | M24104          | vesicle-associated membrane protein 1                     |
| Vapb                   | 13        | 83         | 6.65        | NM_021847       | vesicle-associated membrane protein, associated prote     |
| Zyg11bl                | 80        | 207        | 2.59        | BF567873        | zyg-11 homolog B (C. elegans)-like                        |

### Development

| Sample                | F3-Cont   | F3-Vinc    | Vin/Con     | Genbank         | Gene Title                                             |
|-----------------------|-----------|------------|-------------|-----------------|--------------------------------------------------------|
| Gene Symbol           | Raw       | Raw        | Ratio       |                 |                                                        |
| Apc                   | 77        | 144        | 1.87        | NM_012499       | adenomatosis polyposis coli                            |
| Aph1a                 | 53        | 82         | 1.56        | BI275921        | anterior pharynx defective 1a homolog (C. elegans)     |
| Apeg1                 | 143       | 86         | 0.60        | NM_012905       | aortic preferentially expressed gene 1                 |
| Atxn2_predicte        | 410       | 656        | 1.60        | BE109041        | ataxin 2 (predicted)                                   |
| Atxn2l_predicte       | 52        | 88         | 1.71        | BE349657        | ataxin 2-like (predicted)                              |
| Bbx_predicted         | 42        | 227        | 5.40        | BF392234        | bobby sox homolog (Drosophila) (predicted)             |
| Bai3_predicted        | 48        | 100        | 2.08        | BF409866        | Brain-specific angiogenesis inhibitor 3 (predicted)    |
| Cops7a_predict        | 123       | 190        | 1.55        | BE110772        | COP9 (constitutive photomorphogenic) homolog, subur    |
| Cpne8_predicte        | 18        | 119        | 6.75        | AI059204        | copine VIII (predicted)                                |
| Cryl1                 | 241       | 135        | 0.56        | BI293393        | crystallin, lamda 1                                    |
| <b>Crim1_predicte</b> | <b>31</b> | <b>160</b> | <b>5.07</b> | <b>BI289620</b> | <b>cysteine-rich motor neuron 1 (predicted)</b>        |
| Cyfp2_predicte        | 131       | 242        | 1.84        | BE105837        | cytoplasmic FMR1 interacting protein 2 (predicted)     |
| Dlgap3                | 17        | 99         | 5.80        | U67139          | discs, large (Drosophila) homolog-associated protein 3 |
| Dlgh1                 | 59        | 113        | 1.93        | NM_012788       | discs, large homolog 1 (Drosophila)                    |
| Dlgh2                 | 26        | 81         | 3.11        | BI296447        | Discs, large homolog 2 (Drosophila)                    |

|                  |     |      |              |           |                                                             |
|------------------|-----|------|--------------|-----------|-------------------------------------------------------------|
| Dlgh4            | 26  | 98   | <b>3.85</b>  | NM_019621 | discs, large homolog 4 (Drosophila)                         |
| Dlgap4           | 334 | 537  | <b>1.61</b>  | U67140    | discs, large homolog-associated protein 4 (Drosophila)      |
| Elavl1_predicted | 156 | 1107 | <b>7.12</b>  | BE104552  | ELAV (embryonic lethal, abnormal vision, Drosophila)-li     |
| Elavl2           | 413 | 1045 | <b>2.53</b>  | BF563441  | ELAV (embryonic lethal, abnormal vision, Drosophila)-li     |
| Fbn1             | 82  | 48   | <b>0.59</b>  | BM389019  | fibrillin 1                                                 |
| Fcmd_predicted   | 232 | 473  | <b>2.04</b>  | AI101490  | Fukuyama type congenital muscular dystrophy homolog         |
| Grhl1_predicted  | 130 | 198  | <b>1.52</b>  | BM383749  | Grainyhead-like 1 (Drosophila) (predicted)                  |
| Hdh              | 109 | 65   | <b>0.60</b>  | BI274329  | Huntington disease gene homolog                             |
| Ibtk_predicted   | 135 | 89   | <b>0.66</b>  | AW525218  | inhibitor of Bruton agammaglobulinemia tyrosine kinase      |
| Vof16            | 7   | 122  | <b>18.13</b> | BE107282  | ischemia related factor vof-16                              |
| Kidins220        | 51  | 146  | <b>2.86</b>  | AF313464  | kinase D-interacting substance 220                          |
| Lrrn6a           | 965 | 1821 | <b>1.89</b>  | AI711152  | leucine rich repeat neuronal 6A                             |
| Mpv17_predicted  | 32  | 187  | <b>5.78</b>  | AA849966  | Mpv17 transgene, kidney disease mutant-like (predicted)     |
| Mbp              | 383 | 3170 | <b>8.27</b>  | NM_017026 | myelin basic protein                                        |
| Mog              | 43  | 88   | <b>2.08</b>  | BF410306  | Myelin oligodendrocyte glycoprotein                         |
| Mobp             | 288 | 801  | <b>2.78</b>  | D28110    | myelin-associated oligodendrocytic basic protein            |
| Nsf              | 292 | 873  | <b>2.99</b>  | AF142097  | N-ethylmaleimide sensitive fusion protein                   |
| Napg             | 80  | 174  | <b>2.16</b>  | AA956372  | N-ethylmaleimide-sensitive factor attachment protein, g     |
| Nedd4a           | 524 | 2373 | <b>4.53</b>  | BI284798  | neural precursor cell expressed, developmentally down       |
| Neurod2          | 39  | 116  | <b>2.97</b>  | NM_019326 | neurogenic differentiation 2                                |
| LOC681423 /// I  | 18  | 117  | <b>6.48</b>  | BE117361  | Nipped-B homolog (Drosophila) /// similar to delangin is    |
| Odz2             | 122 | 264  | <b>2.17</b>  | NM_020088 | odd Oz/ten-m homolog 2 (Drosophila)                         |
| Opa1             | 45  | 95   | <b>2.12</b>  | BF407962  | Optic atrophy 1 homolog (human)                             |
| Pmp22            | 61  | 137  | <b>2.23</b>  | AW252810  | peripheral myelin protein 22                                |
| Prg1             | 132 | 505  | <b>3.84</b>  | BF394800  | plasticity related gene 1                                   |
| Peo1_predicted   | 249 | 158  | <b>0.64</b>  | AA925995  | progressive external ophthalmoplegia 1 homolog (hum         |
| Rb1cc1_predict   | 196 | 449  | <b>2.28</b>  | BG671668  | RB1-inducible coiled-coil 1 (predicted)                     |
| Rqcd1            | 93  | 160  | <b>1.73</b>  | AI044879  | rcd1 (required for cell differentiation) homolog 1 (S. pon  |
| Reln             | 43  | 89   | <b>2.06</b>  | NM_080394 | reelin                                                      |
| Sema6a_predic    | 60  | 93   | <b>1.55</b>  | BM387083  | sema domain, transmembrane domain (TM), and cytop           |
| LOC682864        | 36  | 147  | <b>4.08</b>  | BE116720  | similar to 82-kD FMRP Interacting Protein                   |
| LOC499716        | 47  | 78   | <b>1.67</b>  | AA818641  | similar to DnaJ (Hsp40) homolog, subfamily B, member        |
| LOC686892        | 44  | 188  | <b>4.29</b>  | AI180361  | similar to muscleblind-like 1 isoform d                     |
| RGD1565589_f     | 151 | 273  | <b>1.80</b>  | BM390561  | similar to myocardial ischemic preconditioning upregula     |
| LOC682507        | 46  | 475  | <b>10.31</b> | AI706673  | similar to Neural Wiskott-Aldrich syndrome protein (N-V     |
| RGD1566269_f     | 381 | 208  | <b>0.55</b>  | BE118896  | Similar to Neuropilin- and tolloid-like protein 1 (predicte |
| RGD1310358_f     | 123 | 252  | <b>2.06</b>  | BF567255  | similar to NNX3 (predicted)                                 |
| RGD1559723_f     | 23  | 113  | <b>4.82</b>  | BE114807  | similar to Spn protein (predicted)                          |
| LOC680647        | 36  | 86   | <b>2.42</b>  | BG667371  | Similar to TFA2 protein                                     |
| LOC687031        | 57  | 164  | <b>2.90</b>  | BE116590  | Similar to transmembrane protein SHREW1                     |
| Slit3            | 171 | 88   | <b>0.51</b>  | BF386446  | Slit homolog 3 (Drosophila)                                 |
| Spg20            | 59  | 100  | <b>1.71</b>  | AI576427  | spastic paraplegia 20, spartin (Troyer syndrome) homo       |
| Smndc1           | 60  | 100  | <b>1.67</b>  | BI288396  | survival motor neuron domain containing 1                   |
| Syn2             | 114 | 561  | <b>4.92</b>  | NM_019159 | synapsin II                                                 |
| Sncb             | 135 | 228  | <b>1.69</b>  | NM_080777 | synuclein, beta                                             |
| Sncg             | 535 | 1003 | <b>1.87</b>  | NM_031688 | synuclein, gamma                                            |
| Tor1aip1         | 146 | 363  | <b>2.49</b>  | U19614    | torsin A interacting protein 1                              |
| Trak2            | 101 | 844  | <b>8.35</b>  | BG378620  | trafficking protein, kinesin binding 2                      |
| Trps1_predicted  | 62  | 307  | <b>4.91</b>  | BF398245  | trichorhinophalangeal syndrome I (predicted)                |
| Trps1_predicted  | 121 | 430  | <b>3.55</b>  | BF550315  | trichorhinophalangeal syndrome I (predicted)                |
| Wbscr1           | 16  | 142  | <b>8.74</b>  | H31800    | Williams-Beuren syndrome chromosome region 1 hom            |
| Wasip            | 626 | 377  | <b>0.60</b>  | NM_057192 | Wiskott-Aldrich syndrome protein interacting protein        |
| Whsc1l1_predic   | 94  | 239  | <b>2.56</b>  | AI234807  | Wolf-Hirschhorn syndrome candidate 1-like 1 (predicte       |
| Rbaf600          | 20  | 77   | <b>3.85</b>  | BF392966  | ZUBR1                                                       |

#### Electron Transport

| Sample      | F3-Cont | F3-Vinc | Vin/Con     | Genbank   | Gene Title                                      |
|-------------|---------|---------|-------------|-----------|-------------------------------------------------|
| Gene Symbol | Raw     | Raw     | Ratio       | Genbank   | Gene Title                                      |
| Cyp51       | 613     | 1238    | <b>2.02</b> | NM_012941 | cytochrome P450, subfamily 51                   |
| Glrx2       | 76      | 475     | <b>6.27</b> | BG671304  | Glutaredoxin 2 (thioltransferase)               |
| Iag2        | 46      | 145     | <b>3.13</b> | NM_053946 | implantation-associated protein                 |
| Uqcrc2      | 241     | 418     | <b>1.74</b> | BF290998  | ubiquinol cytochrome c reductase core protein 2 |

#### Epigenetics/Gene Modifying Factors

| Sample         | F3-Cont | F3-Vinc | Vin/Con     | Genbank  | Gene Title                                               |
|----------------|---------|---------|-------------|----------|----------------------------------------------------------|
| Gene Symbol    | Raw     | Raw     | Ratio       | Genbank  | Gene Title                                               |
| Atrx           | 13      | 87      | <b>6.48</b> | BF397805 | alpha thalassemia/mental retardation syndrome X-link     |
| Rere           | 96      | 61      | <b>0.64</b> | BF412271 | Arginine-glutamic acid dipeptide (RE) repeats            |
| Ash1_predicted | 20      | 143     | <b>7.10</b> | BG663056 | ash1 (absent, small, or homeotic)-like (Drosophila) (pre |

|                       |     |      |              |                 |                                                            |
|-----------------------|-----|------|--------------|-----------------|------------------------------------------------------------|
| Brd2                  | 78  | 127  | <b>1.64</b>  | AA946361        | bromodomain containing 2                                   |
| Brd3_predicted        | 62  | 271  | <b>4.37</b>  | AI172375        | bromodomain containing 3 (predicted)                       |
| Brd4                  | 12  | 178  | <b>14.61</b> | BM389207        | bromodomain containing 4                                   |
| Csnk2a1               | 19  | 268  | <b>13.81</b> | BF288177        | casein kinase II, alpha 1 polypeptide                      |
| Csnk2a2_predict       | 38  | 106  | <b>2.81</b>  | BI290750        | casein kinase II, alpha 2, polypeptide (predicted)         |
| Chd1_predicted        | 60  | 137  | <b>2.28</b>  | AA955721        | chromodomain helicase DNA binding protein 1 (predict       |
| <i>Chd2_predictec</i> | 91  | 51   | <b>0.56</b>  | <i>BF396633</i> | <i>Chromodomain helicase DNA binding protein 2 (predic</i> |
| Cxxc5                 | 276 | 564  | <b>2.04</b>  | BI281838        | CXXC finger 5                                              |
| Tia1                  | 46  | 99   | <b>2.14</b>  | BI298817        | Cytotoxic granule-associated RNA binding protein 1         |
| Epc2_predicted        | 64  | 138  | <b>2.17</b>  | AW918173        | enhancer of polycomb homolog 2 (Drosophila) (predict       |
| H2afy                 | 169 | 403  | <b>2.38</b>  | M99065          | H2A histone family, member Y                               |
| Hdac4_predicte        | 46  | 120  | <b>2.63</b>  | BF419085        | histone deacetylase 4 (predicted)                          |
| Impact                | 155 | 253  | <b>1.63</b>  | BG664101        | imprinted and ancient                                      |
| Id4                   | 23  | 99   | <b>4.38</b>  | AI412150        | inhibitor of DNA binding 4                                 |
| Jmjd3_predicte        | 50  | 150  | <b>3.02</b>  | BE118720        | jumonji domain containing 3 (predicted)                    |
| Metap1_predict        | 58  | 91   | <b>1.59</b>  | AI101470        | methionyl aminopeptidase 1 (predicted)                     |
| Prdm2                 | 33  | 168  | <b>5.05</b>  | BF388420        | PR domain containing 2, with ZNF domain                    |
| Pcmt2_predict         | 709 | 1292 | <b>1.82</b>  | AA955163        | protein-L-isoaspartate (D-aspartate) O-methyltransfera     |
| RGD1566399_f          | 95  | 155  | <b>1.63</b>  | BE098769        | similar to MYST histone acetyltransferase monocytic le     |
| LOC314964             | 24  | 83   | <b>3.51</b>  | AA965250        | similar to PHD finger protein 20-like 1 isoform 1          |
| LOC681178 /// I       | 134 | 234  | <b>1.75</b>  | BI288196        | similar to polycomb group ring finger 5                    |
| Smarca2               | 70  | 148  | <b>2.12</b>  | BE102268        | SWI/SNF related, matrix associated, actin dependent re     |
| Smarca4               | 24  | 223  | <b>9.41</b>  | BE111847        | SWI/SNF related, matrix associated, actin dependent re     |

### Golgi Apparatus

| Sample              | F3-Cont | F3-Vinc | Vin/Con      | Genbank         | Gene Title                                               |
|---------------------|---------|---------|--------------|-----------------|----------------------------------------------------------|
| Gene Symbol         | Raw     | Raw     | <b>Ratio</b> | Genbank         | Gene Title                                               |
| Ap1s1_predicte      | 215     | 524     | <b>2.44</b>  | AA955775        | adaptor protein complex AP-1, sigma 1 (predicted)        |
| Ap2b1               | 26      | 95      | <b>3.66</b>  | M34176          | adaptor-related protein complex 2, beta 1 subunit        |
| Copz1_predicte      | 124     | 217     | <b>1.75</b>  | BF406339        | coatamer protein complex, subunit zeta 1 (predicted)     |
| Cbfa2t3_predict     | 45      | 93      | <b>2.07</b>  | BE115481        | core-binding factor, runt domain, alpha subunit 2; trans |
| Gga3_predictec      | 320     | 114     | <b>0.35</b>  | BE112983        | golgi associated, gamma adaptin ear containing, ARF t    |
| Gla                 | 60      | 112     | <b>1.86</b>  | BM385090        | galactosidase, alpha                                     |
| Golph3              | 58      | 101     | <b>1.74</b>  | NM_023977       | golgi phosphoprotein 3                                   |
| Hs2st1              | 226     | 439     | <b>1.94</b>  | AI714262        | heparan sulfate 2-O-sulfotransferase 1                   |
| Pde4dip             | 54      | 114     | <b>2.11</b>  | NM_022382       | phosphodiesterase 4D interacting protein (myomegalin     |
| Pde4dip             | 450     | 278     | <b>0.62</b>  | AI763912        | Phosphodiesterase 4D interacting protein (myomegalin     |
| <i>RGD1560511_f</i> | 79      | 189     | <b>2.40</b>  | <i>BI281965</i> | <i>similar to Vps41 protein (predicted)</i>              |
| Surf4               | 146     | 97      | <b>0.66</b>  | AI227937        | surfeit 4                                                |
| Tgoln2              | 53      | 98      | <b>1.87</b>  | AW917192        | trans-golgi network protein 2                            |

### Growth Factors, Cyto- and Chemokines

| Sample          | F3-Cont    | F3-Vinc   | Vin/Con      | Genbank         | Gene Title                                              |
|-----------------|------------|-----------|--------------|-----------------|---------------------------------------------------------|
| Gene Symbol     | Raw        | Raw       | <b>Ratio</b> | Genbank         | Gene Title                                              |
| Api5_predicted  | 64         | 108       | <b>1.68</b>  | H34636          | apoptosis inhibitor 5 (predicted)                       |
| Bdnf            | 137        | 236       | <b>1.72</b>  | NM_012513       | brain derived neurotrophic factor                       |
| Cxcl12          | 52         | 155       | <b>2.97</b>  | AF189724        | chemokine (C-X-C motif) ligand 12                       |
| Crif1_predicted | 44         | 81        | <b>1.84</b>  | AA866388        | cytokine receptor-like factor 1 (predicted)             |
| Igf2            | 131        | 308       | <b>2.36</b>  | NM_031511       | insulin-like growth factor 2                            |
| Il6st           | 153        | 382       | <b>2.49</b>  | BM383427        | interleukin 6 signal transducer                         |
| Gdf1_predicted  | 716        | 433       | <b>0.60</b>  | AI549010        | longevity assurance homolog 1 (S. cerevisiae) (predict  |
| Negr1           | 155        | 964       | <b>6.21</b>  | NM_021682       | neuronal growth regulator 1                             |
| Ogn_predicted   | 55         | 117       | <b>2.14</b>  | BG664221        | osteoglycin (predicted)                                 |
| Sep3            | 88         | 183       | <b>2.08</b>  | NM_019375       | septin 3                                                |
| Sept6_predicte  | 117        | 262       | <b>2.24</b>  | AW532098        | Septin 6 (predicted)                                    |
| Sep7            | 294        | 569       | <b>1.93</b>  | NM_022616       | septin 7                                                |
| Sst             | 468        | 307       | <b>0.66</b>  | NM_012659       | somatostatin                                            |
| <b>Tgfb2</b>    | <b>121</b> | <b>70</b> | <b>0.58</b>  | <b>BE117736</b> | <b>Transforming growth factor, beta 2</b>               |
| Tmeff1          | 74         | 177       | <b>2.38</b>  | NM_023020       | transmembrane protein with EGF-like and two follistatin |

### Immune Response

| Sample          | F3-Cont | F3-Vinc | Vin/Con      | Genbank   | Gene Title                                               |
|-----------------|---------|---------|--------------|-----------|----------------------------------------------------------|
| Gene Symbol     | Raw     | Raw     | <b>Ratio</b> | Genbank   | Gene Title                                               |
| Cd2bp2_predict  | 32      | 76      | <b>2.38</b>  | BG379822  | CD2 antigen (cytoplasmic tail) binding protein 2 (predic |
| Cd74            | 70      | 203     | <b>2.89</b>  | NM_013069 | CD74 antigen (invariant polypeptide of major histocomp   |
| Cd99            | 64      | 101     | <b>1.59</b>  | AI235284  | CD99 antigen                                             |
| C7 /// Tubb2c   | 51      | 89      | <b>1.76</b>  | BF284922  | complement component 7 /// tubulin, beta 2c              |
| Igsf4b_predicte | 36      | 109     | <b>3.06</b>  | BF409960  | immunoglobulin superfamily, member 4B (predicted)        |
| Ke2             | 530     | 938     | <b>1.77</b>  | AW434268  | MHC class II region expressed gene KE2                   |

|                        |     |      |              |                 |                                                              |
|------------------------|-----|------|--------------|-----------------|--------------------------------------------------------------|
| Pafah1b1               | 45  | 141  | <b>3.11</b>  | BG663460        | platelet-activating factor acetylhydrolase, isoform Ib, al   |
| <i>RT1-Ke4</i>         | 301 | 134  | <b>0.44</b>  | <i>BM389027</i> | <i>RT1 class I, locus Ke4</i>                                |
| RT1-Aw2                | 208 | 34   | <b>0.16</b>  | AA801218        | RT1 class Ib, locus Aw2                                      |
| <i>RT1-S3</i>          | 86  | 51   | <b>0.59</b>  | <i>AJ243974</i> | <i>RT1 class Ib, locus S3</i>                                |
| RT1-Da                 | 45  | 153  | <b>3.36</b>  | Y00480          | RT1 class II, locus Da                                       |
| RT1-149                | 109 | 65   | <b>0.60</b>  | BI282965        | RT1-149 protein                                              |
| Sema4f                 | 143 | 95   | <b>0.66</b>  | NM_019272       | sema domain, immunoglobulin domain (Ig), transmemb           |
| LOC690085              | 38  | 199  | <b>5.29</b>  | AW534002        | Similar to B-cell CLL/lymphoma 7A                            |
| LOC680404 /// I        | 117 | 1507 | <b>12.89</b> | BG374818        | similar to Complement C1q-like protein 3 precursor (Gli      |
| LOC296637              | 118 | 259  | <b>2.20</b>  | AA944347        | similar to HLA-B associated transcript-2 isoform a           |
| RGD1563429_f           | 61  | 463  | <b>7.56</b>  | BM391860        | similar to T-cell activation leucine repeat-rich protein (pi |
| <i>Stag1_predicted</i> | 100 | 49   | <b>0.49</b>  | <i>AI071210</i> | <i>Stromal antigen 1 (predicted)</i>                         |
| Thy1                   | 213 | 597  | <b>2.81</b>  | NM_012673       | thymus cell antigen 1, theta                                 |
| Wrb                    | 87  | 147  | <b>1.69</b>  | BI280216        | tryptophan rich basic protein                                |

### Metabolism & Transport

| Sample          | F3-Cont    | F3-Vinc    | Vin/Con      | Gene Symbol      | Gene Title                                                |
|-----------------|------------|------------|--------------|------------------|-----------------------------------------------------------|
| Agpat1          | 74         | 167        | <b>2.24</b>  | BF390804         | 1-acylglycerol-3-phosphate O-acyltransferase 1            |
| Abhd8_predicted | 10         | 227        | <b>22.52</b> | AI137533         | abhydrolase domain containing 8 (predicted)               |
| Acs1            | 52         | 126        | <b>2.45</b>  | BI277523         | acyl-CoA synthetase long-chain family member 1            |
| Adpgk           | 65         | 170        | <b>2.60</b>  | BE102146         | ADP-dependent glucokinase                                 |
| Aldh1a2         | 59         | 119        | <b>2.01</b>  | NM_053896        | aldehyde dehydrogenase family 1, subfamily A2             |
| Aldh6a1         | 50         | 103        | <b>2.05</b>  | NM_031057        | aldehyde dehydrogenase family 6, subfamily A1             |
| Accn2           | 95         | 58         | <b>0.61</b>  | AJ309926         | amiloride-sensitive cation channel 2, neuronal            |
| <i>Aqp4</i>     | 84         | 255        | <b>3.03</b>  | <i>NM_012825</i> | <i>aquaporin 4</i>                                        |
| Aqp9            | 86         | 53         | <b>0.61</b>  | NM_022960        | aquaporin 9                                               |
| <i>Arcn1</i>    | 55         | 153        | <b>2.78</b>  | <i>BF414061</i>  | <i>archain 1</i>                                          |
| <b>Arg2</b>     | <b>125</b> | <b>245</b> | <b>1.96</b>  | <b>AI574994</b>  | <b>Arginase 2</b>                                         |
| Asna1           | 194        | 308        | <b>1.59</b>  | AI406558         | arsA arsenite transporter, ATP-binding, homolog 1 (bac    |
| Arsb            | 72         | 114        | <b>1.57</b>  | AW917073         | arylsulfatase B                                           |
| Atp2a2          | 79         | 331        | <b>4.19</b>  | J04024           | ATPase, Ca++ transporting, cardiac muscle, slow twitcl    |
| Atp2b1          | 1829       | 3444       | <b>1.88</b>  | NM_053311        | ATPase, Ca++ transporting, plasma membrane 1              |
| Atp6v1a1_predi  | 636        | 1617       | <b>2.54</b>  | BI289589         | ATPase, H transporting, lysosomal V1 subunit A (predic    |
| Atp6v1b2        | 568        | 1031       | <b>1.82</b>  | NM_057213        | ATPase, H transporting, lysosomal V1 subunit B2           |
| Atp6v0a2        | 37         | 112        | <b>3.03</b>  | BE110564         | ATPase, H+ transporting, lysosomal V0 subunit a isofo     |
| Atp1a1          | 45         | 293        | <b>6.56</b>  | M74494           | ATPase, Na+/K+ transporting, alpha 1 polypeptide          |
| Atp1a3          | 1132       | 746        | <b>0.66</b>  | NM_012506        | ATPase, Na+/K+ transporting, alpha 3 polypeptide          |
| Atp1b2          | 15         | 194        | <b>12.92</b> | U45946           | ATPase, Na+/K+ transporting, beta 2 polypeptide           |
| B3gat1          | 43         | 87         | <b>2.03</b>  | NM_054003        | beta-1,3-glucuronyltransferase 1 (glucuronosyltransferase |
| Bace1           | 38         | 149        | <b>3.88</b>  | BG377970         | Beta-site APP cleaving enzyme 1                           |
| Cacna2d3        | 20         | 99         | <b>4.94</b>  | BE108017         | Calcium channel, voltage-dependent, alpha 2/delta 3 su    |
| Cacnb1          | 79         | 144        | <b>1.81</b>  | NM_017346        | calcium channel, voltage-dependent, beta 1 subunit        |
| Cacng3          | 117        | 218        | <b>1.87</b>  | AF361340         | calcium channel, voltage-dependent, gamma subunit 3       |
| Cacng8          | 95         | 60         | <b>0.63</b>  | BE114019         | Calcium channel, voltage-dependent, gamma subunit 8       |
| Clstn2          | 24         | 268        | <b>11.10</b> | BE109141         | Calsyntenin 2                                             |
| Chst2_predicted | 290        | 585        | <b>2.02</b>  | AW520944         | carbohydrate sulfotransferase 2 (predicted)               |
| Car11           | 128        | 229        | <b>1.78</b>  | AW252112         | carbonic anhydrase 11                                     |
| Ca3             | 28         | 228        | <b>8.01</b>  | <i>AB030829</i>  | <i>carbonic anhydrase 3</i>                               |
| Cs              | 136        | 269        | <b>1.98</b>  | NM_130755        | citrate synthase                                          |
| Cplx1           | 56         | 184        | <b>3.29</b>  | U35098           | complexin 1                                               |
| Cplx2           | 47         | 345        | <b>7.29</b>  | NM_053878        | complexin 2                                               |
| Ckmt1           | 1166       | 750        | <b>0.64</b>  | BI301453         | creatine kinase, mitochondrial 1, ubiquitous              |
| Capon           | 94         | 339        | <b>3.60</b>  | AF037071         | C-terminal PDZ domain ligand of neuronal nitric oxide s   |
| Dgkg            | 160        | 599        | <b>3.75</b>  | NM_013126        | diacylglycerol kinase, gamma                              |
| Elovl6          | 54         | 271        | <b>5.03</b>  | BF396857         | ELOVL family member 6, elongation of long chain fatty     |
| Etnk1_predicted | 83         | 133        | <b>1.61</b>  | BG668816         | ethanolamine kinase 1 (predicted)                         |
| Xpo4_predicted  | 25         | 108        | <b>4.31</b>  | BF397646         | exportin 4 (predicted)                                    |
| Fmo1            | 58         | 87         | <b>1.51</b>  | NM_012792        | flavin containing monooxygenase 1                         |
| Gja1            | 13         | 81         | <b>6.11</b>  | BG378227         | gap junction membrane channel protein alpha 1             |
| Got1            | 438        | 822        | <b>1.87</b>  | D00252           | glutamate oxaloacetate transaminase 1                     |
| Glul            | 270        | 509        | <b>1.88</b>  | BI296610         | glutamate-ammonia ligase (glutamine synthase)             |
| Gls             | 67         | 145        | <b>2.15</b>  | M22586           | glutaminase                                               |
| Gapdh           | 1258       | 3188       | <b>2.53</b>  | X_Rat_GAPC       | glyceraldehyde-3-phosphate dehydrogenase                  |
| Gpd1            | 112        | 66         | <b>0.59</b>  | BF399697         | Glycerol-3-phosphate dehydrogenase 1 (soluble)            |
| Gsk3b           | 16         | 115        | <b>7.03</b>  | BF287444         | glycogen synthase kinase 3 beta                           |
| Gda             | 830        | 1718       | <b>2.07</b>  | AF245172         | guanine deaminase                                         |
| Hba-a1 /// LOC: | 4846       | 2874       | <b>0.59</b>  | AI179404         | hemoglobin alpha, adult chain 1 /// hemoglobin alpha 2    |
| HK1             | 93         | 222        | <b>2.40</b>  | _Rat_Hexokir     | hexokinase 1                                              |

|                  |      |      |              |           |                                                              |
|------------------|------|------|--------------|-----------|--------------------------------------------------------------|
| Hcn2             | 41   | 110  | <b>2.67</b>  | AW532988  | hyperpolarization activated cyclic nucleotide-gated pota     |
| Hprt             | 43   | 78   | <b>1.81</b>  | BE117366  | Hypoxanthine guanine phosphoribosyl transferase              |
| Kpnb1            | 18   | 92   | <b>5.01</b>  | NM_017063 | karyopherin (importin) beta 1                                |
| Kcnp2            | 17   | 93   | <b>5.40</b>  | AF269283  | Kv channel-interacting protein 2                             |
| Lypla2           | 63   | 132  | <b>2.11</b>  | NM_031342 | lysophospholipase 2                                          |
| Man1a_predicted  | 399  | 237  | <b>0.59</b>  | AA892549  | mannosidase 1, alpha (predicted)                             |
| Man2a2_predic    | 295  | 192  | <b>0.65</b>  | BE099244  | Mannosidase 2, alpha 2 (predicted)                           |
| Magi2            | 36   | 168  | <b>4.69</b>  | AF130819  | membrane associated guanylate kinase, WW and PDZ             |
| Maoa             | 235  | 752  | <b>3.20</b>  | D00688    | monoamine oxidase A                                          |
| Mgll             | 15   | 216  | <b>14.29</b> | AY081195  | monoglyceride lipase                                         |
| Asah1            | 80   | 123  | <b>1.54</b>  | NM_053407 | N-acylsphingosine amidohydrolase 1                           |
| Por              | 26   | 133  | <b>5.12</b>  | AI407454  | P450 (cytochrome) oxidoreductase                             |
| Pex2             | 54   | 114  | <b>2.13</b>  | BF413248  | Peroxin 2                                                    |
| Ppap2b           | 30   | 571  | <b>18.84</b> | AW253995  | phosphatidic acid phosphatase type 2B                        |
| Ptdss1           | 349  | 611  | <b>1.75</b>  | AA851302  | phosphatidylserine synthase 1                                |
| Plcl1            | 1062 | 696  | <b>0.66</b>  | NM_053456 | phospholipase C-like 1                                       |
| Prps1            | 183  | 292  | <b>1.59</b>  | M29392    | phosphoribosyl pyrophosphate synthetase 1                    |
| Prps2            | 124  | 203  | <b>1.64</b>  | NM_012634 | phosphoribosyl pyrophosphate synthetase 2                    |
| Kctd1            | 212  | 140  | <b>0.66</b>  | AI501338  | Potassium channel tetramerisation domain containing 1        |
| Kctd12_predicted | 105  | 162  | <b>1.54</b>  | AA800908  | Potassium channel tetramerisation domain containing 1        |
| Kcnj3            | 37   | 86   | <b>2.35</b>  | U09243    | potassium inwardly-rectifying channel, subfamily J, mem      |
| Kcnd2            | 326  | 900  | <b>2.76</b>  | AW528891  | potassium voltage gated channel, Shal-related family, n      |
| Kcnd3            | 177  | 274  | <b>1.55</b>  | NM_031739 | potassium voltage gated channel, Shal-related family, n      |
| Kcna1            | 129  | 511  | <b>3.97</b>  | M26161    | potassium voltage-gated channel, shaker-related subfa        |
| Kcng2            | 56   | 89   | <b>1.58</b>  | AI407741  | potassium voltage-gated channel, subfamily G, membe          |
| Kcnq3            | 43   | 108  | <b>2.48</b>  | BF400850  | Potassium voltage-gated channel, subfamily Q, membe          |
| Psap             | 523  | 937  | <b>1.79</b>  | NM_013013 | prosaposin                                                   |
| Pin1_predicted   | 539  | 892  | <b>1.65</b>  | BM388765  | protein (peptidyl-prolyl cis/trans isomerase) NIMA-inter     |
| Ahcy11_predicted | 199  | 486  | <b>2.45</b>  | BF397074  | S-adenosylhomocysteine hydrolase-like 1 (predicted)          |
| Srpk2_predicted  | 24   | 262  | <b>10.93</b> | BE113419  | serine/arginine-rich protein specific kinase 2 (predicted)   |
| LOC365090        | 45   | 109  | <b>2.44</b>  | AW140661  | similar to 5-nucleotidase, cytosolic II                      |
| LOC500282        | 173  | 306  | <b>1.77</b>  | BG671292  | similar to ADP-ribosylation factor-like 10C                  |
| LOC682926 /// I  | 91   | 136  | <b>1.50</b>  | BF557618  | similar to chromatin modifying protein 1B                    |
| RGD1311444_f     | 427  | 768  | <b>1.80</b>  | BF557088  | similar to intracellular membrane-associated calcium-in      |
| LOC679692 /// I  | 43   | 168  | <b>3.89</b>  | BE115518  | similar to lysophosphatidylglycerol acyltransferase 1        |
| LOC498358        | 48   | 128  | <b>2.67</b>  | AW918899  | similar to solute carrier family 30 (zinc transporter), mem  |
| LOC499587        | 276  | 1370 | <b>4.96</b>  | AW529244  | similar to solute carrier family 7, member 14                |
| RGD1564893_f     | 151  | 100  | <b>0.66</b>  | AI410604  | similar to surfeit 5 isoform b (predicted)                   |
| Scn3a            | 37   | 158  | <b>4.33</b>  | NM_013119 | sodium channel, voltage-gated, type III, alpha polypept      |
| Slc1a3           | 129  | 477  | <b>3.70</b>  | AF265360  | solute carrier family 1 (glial high affinity glutamate trans |
| Slc16a7          | 65   | 134  | <b>2.05</b>  | X97445    | solute carrier family 16 (monocarboxylic acid transporte     |
| Slc17a7          | 85   | 271  | <b>3.19</b>  | NM_053859 | solute carrier family 17 (sodium-dependent inorganic pl      |
| Slc2a13          | 68   | 279  | <b>4.08</b>  | NM_133611 | solute carrier family 2 (facilitated glucose transporter), r |
| Slc24a2          | 233  | 1304 | <b>5.60</b>  | AF021923  | solute carrier family 24 (sodium/potassium/calcium excl      |
| Slc25a12_predi   | 200  | 124  | <b>0.62</b>  | AI578095  | Solute carrier family 25 (mitochondrial carrier, Aralar), n  |
| Slc27a4          | 161  | 97   | <b>0.60</b>  | BI286134  | solute carrier family 27 (fatty acid transporter), member    |
| Slc3a1           | 277  | 983  | <b>3.55</b>  | NM_017216 | solute carrier family 3, member 1                            |
| Slc35a1_predic   | 56   | 88   | <b>1.58</b>  | BE103444  | solute carrier family 35 (CMP-sialic acid transporter), m    |
| Slc4a4           | 8    | 143  | <b>19.07</b> | AF210250  | solute carrier family 4, member 4                            |
| Slc5a3           | 765  | 455  | <b>0.60</b>  | BE116021  | solute carrier family 5 (inositol transporters), member 3    |
| Slco3a1          | 51   | 109  | <b>2.15</b>  | AF239219  | solute carrier organic anion transporter family, member      |
| St3gal4          | 34   | 87   | <b>2.58</b>  | BF289499  | ST3 beta-galactoside alpha-2,3-sialyltransferase 4           |
| Scd2             | 98   | 559  | <b>5.73</b>  | BE107760  | stearoyl-Coenzyme A desaturase 2                             |
| Sc5d             | 151  | 290  | <b>1.92</b>  | AB052846  | sterol-C5-desaturase (fungal ERG3, delta-5-desaturase        |
| Snap91           | 173  | 95   | <b>0.55</b>  | AW531009  | Synaptosomal-associated protein, 91kDa homolog (mo           |
| Syt1             | 50   | 260  | <b>5.22</b>  | AI413003  | synaptotagmin I                                              |
| Syt4             | 27   | 312  | <b>11.76</b> | L38247    | synaptotagmin IV                                             |
| Syt11            | 21   | 89   | <b>4.15</b>  | NM_031667 | synaptotagmin XI                                             |
| Txnrd1           | 53   | 86   | <b>1.64</b>  | U63923    | thioredoxin reductase 1                                      |
| ---              | 77   | 221  | <b>2.87</b>  | AI029275  | Transcribed locus, weakly similar to XP_001054001.1          |
| Ugt8             | 82   | 154  | <b>1.88</b>  | L21698    | UDP galactosyltransferase 8                                  |
| Galnt1           | 41   | 104  | <b>2.53</b>  | NM_024373 | UDP-N-acetyl-alpha-D-galactosamine:polypeptide N-ac          |
| Galnt2_predicted | 156  | 282  | <b>1.81</b>  | BE111638  | UDP-N-acetyl-alpha-D-galactosamine:polypeptide N-ac          |
| Vip              | 250  | 159  | <b>0.64</b>  | AI412212  | vasoactive intestinal polypeptide                            |
| Vdac1            | 59   | 283  | <b>4.79</b>  | AF268467  | voltage-dependent anion channel 1                            |

#### Proteolysis

| Sample      | F3-Cont | F3-Vinc | Vin/Con | Genbank | Gene Title |
|-------------|---------|---------|---------|---------|------------|
| Gene Symbol | Raw     | Raw     | Ratio   |         |            |

|                        |            |            |              |                 |                                                            |
|------------------------|------------|------------|--------------|-----------------|------------------------------------------------------------|
| Cpd                    | 174        | 846        | <b>4.86</b>  | NM_012836       | carboxypeptidase D                                         |
| Dcun1d4_predic         | 43         | 132        | <b>3.05</b>  | BF288456        | DCN1, defective in cullin neddylation 1, domain contain    |
| Dpp6                   | 80         | 212        | <b>2.66</b>  | NM_022850       | dipeptidylpeptidase 6                                      |
| Dpp8_predicted         | 54         | 111        | <b>2.06</b>  | AI175505        | dipeptidylpeptidase 8 (predicted)                          |
| Laptm4a                | 500        | 1185       | <b>2.37</b>  | AW525776        | lysosomal-associated protein transmembrane 4A              |
| LOC290864              | 56         | 93         | <b>1.66</b>  | AI408662        | similar to Ubiquitin carboxyl-terminal hydrolase 4 (Ubiqui |
| LOC300472              | 48         | 78         | <b>1.63</b>  | BE097616        | similar to Vacuolar protein sorting 26 homolog (VPS26)     |
| LOC316395              | 63         | 191        | <b>3.02</b>  | BE119116        | similar to HECT, C2 and WW domain containing E3 ubi        |
| LOC679539 /// I        | 230        | 533        | <b>2.31</b>  | AW142658        | ubiquitin-conjugating enzyme E2 variant 1 (predicted) /    |
| <b>LOC686268 /// I</b> | <b>138</b> | <b>287</b> | <b>2.07</b>  | <b>BE105606</b> | <b>similar to SUMO/sentrin specific protease 5 (predic</b> |
| Mmp14                  | 22         | 81         | <b>3.62</b>  | X83537          | matrix metalloproteinase 14 (membrane-inserted)            |
| Mmp16                  | 64         | 104        | <b>1.64</b>  | NM_080776       | matrix metalloproteinase 16                                |
| Pja2                   | 334        | 994        | <b>2.98</b>  | AI600019        | praja 2, RING-H2 motif containing                          |
| Prss22_predicte        | 55         | 109        | <b>1.97</b>  | BM389391        | protease, serine, 22 (predicted)                           |
| RGD1560364_f           | 147        | 77         | <b>0.53</b>  | BM384685        | similar to vacuolar protein sorting 13C protein (predicte  |
| RGD1561386_f           | 28         | 93         | <b>3.31</b>  | BE116890        | similar to CBL E3 ubiquitin protein ligase (Signal transd  |
| RGD1563278_f           | 18         | 148        | <b>8.06</b>  | BF402371        | similar to Ubiquitin ligase protein DZIP3 (DAZ-interactir  |
| RGD1565984_f           | 86         | 57         | <b>0.66</b>  | BE097603        | similar to Ubiquitin carboxyl-terminal hydrolase 35 (Ubi   |
| <b>Rnf187_predic</b>   | <b>32</b>  | <b>93</b>  | <b>2.88</b>  | <b>AI502527</b> | <b>ring finger protein 187 (predicted)</b>                 |
| <b>Rnf6_predicte</b>   | <b>22</b>  | <b>117</b> | <b>5.25</b>  | <b>BI296352</b> | <b>ring finger protein (C3H2C3 type) 6 (predicted)</b>     |
| Saps1_predicte         | 116        | 184        | <b>1.59</b>  | BF399333        | SAPS domain family, member 1 (predicted)                   |
| Senp6_predicte         | 96         | 147        | <b>1.54</b>  | H32530          | SUMO/sentrin specific peptidase 6 (predicted)              |
| Siah1a                 | 76         | 116        | <b>1.53</b>  | NM_080905       | seven in absentia 1A                                       |
| Smurf2_predict         | 9          | 106        | <b>12.01</b> | BF393807        | SMAD specific E3 ubiquitin protein ligase 2 (predicted)    |
| Timp2                  | 31         | 111        | <b>3.54</b>  | BF523128        | tissue inhibitor of metalloproteinase 2                    |
| Tpp1                   | 191        | 480        | <b>2.51</b>  | NM_031357       | tripeptidyl peptidase I                                    |
| Ube2d2                 | 128        | 391        | <b>3.05</b>  | BF283846        | Ubiquitin-conjugating enzyme E2D 2                         |
| Ube2g1                 | 113        | 240        | <b>2.12</b>  | AF099093        | ubiquitin-conjugating enzyme E2G 1 (UBC7 homolog, C        |
| Ube2n                  | 723        | 456        | <b>0.63</b>  | BI294702        | ubiquitin-conjugating enzyme E2N                           |
| Ubl3                   | 128        | 217        | <b>1.69</b>  | BG672206        | ubiquitin-like 3                                           |
| Usp1                   | 16         | 110        | <b>6.90</b>  | AW525342        | ubiquitin specific peptidase 1                             |
| Usp32_predicte         | 20         | 84         | <b>4.28</b>  | AI231505        | ubiquitin specific protease 32 (predicted)                 |
| Usp33                  | 156        | 333        | <b>2.13</b>  | BE108244        | Ubiquitin specific peptidase 33                            |
| <i>Usp47_predicte</i>  | <i>119</i> | <i>197</i> | <i>1.66</i>  | <i>AI407830</i> | <i>ubiquitin specific protease 47 (predicted)</i>          |
| Usp7                   | 156        | 381        | <b>2.45</b>  | AI175593        | Ubiquitin specific protease 7 (herpes virus-associated)    |
| Usp8_predicted         | 224        | 361        | <b>1.61</b>  | AI137190        | ubiquitin specific protease 8 (predicted)                  |
| Wsb2                   | 106        | 211        | <b>2.00</b>  | AA848210        | WD repeat and SOCS box-containing 2                        |

### Receptors & Binding Proteins

| Sample         | F3-Cont    | F3-Vinc    | Vin/Con      | Genbank          | Gene Title                                                 |
|----------------|------------|------------|--------------|------------------|------------------------------------------------------------|
| Gene Symbol    | Raw        | Raw        | Ratio        |                  |                                                            |
| Atrn           | 455        | 301        | <b>0.66</b>  | AB038388         | attractin                                                  |
| <i>Abca1</i>   | <i>35</i>  | <i>124</i> | <i>3.58</i>  | <i>AI502114</i>  | <i>ATP-binding cassette, sub-family A (ABC1), member 1</i> |
| Aebp1_predicte | 64         | 97         | <b>1.51</b>  | BI278482         | AE binding protein 1 (predicted)                           |
| Agtrap         | 158        | 103        | <b>0.65</b>  | BE349785         | angiotensin II, type I receptor-associated protein         |
| Apba2          | 317        | 513        | <b>1.62</b>  | NM_031780        | amyloid beta (A4) precursor protein-binding, family A, n   |
| Appbp2         | 43         | 122        | <b>2.84</b>  | BE113611         | amyloid beta precursor protein (cytoplasmic tail) bindin   |
| Bmpr1a         | 70         | 124        | <b>1.77</b>  | NM_030849        | bone morphogenetic protein receptor, type 1A               |
| Bmpr2          | 8          | 176        | <b>22.08</b> | BE118651         | bone morphogenetic protein receptor, type II (serine/thre  |
| Chp /// RGD156 | 58         | 129        | <b>2.23</b>  | AB070350         | calcium binding protein p22 /// similar to calcium bindin  |
| <i>Crebl2</i>  | <i>56</i>  | <i>163</i> | <i>2.91</i>  | <i>BE102391</i>  | <i>cAMP responsive element binding protein-like 2</i>      |
| Ednrb          | 21         | 230        | <b>11.00</b> | X57764           | endothelin receptor type B                                 |
| Egfr           | 8          | 87         | <b>11.17</b> | M37394           | epidermal growth factor receptor                           |
| Epha7          | 72         | 114        | <b>1.58</b>  | U21955           | Eph receptor A7                                            |
| Esrrg          | 47         | 97         | <b>2.06</b>  | AA996810         | Estrogen-related receptor gamma                            |
| Fgfr1          | 103        | 233        | <b>2.26</b>  | S54008           | Fibroblast growth factor receptor 1                        |
| Gabbr1         | 7          | 161        | <b>22.23</b> | Y10369           | gamma-aminobutyric acid (GABA) B receptor 1                |
| Gabbr3         | 25         | 117        | <b>4.69</b>  | NM_017065        | gamma-aminobutyric acid (GABA-A) receptor, subunit I       |
| Gabrg1         | 48         | 103        | <b>2.13</b>  | NM_080586        | gamma-aminobutyric acid A receptor, gamma 1                |
| Gpr21_predicte | 622        | 368        | <b>0.59</b>  | BG374688         | G protein-coupled receptor 21 (predicted)                  |
| Gpr3711        | 356        | 632        | <b>1.78</b>  | AF087947         | G protein-coupled receptor 37-like 1                       |
| Gpr85          | 232        | 367        | <b>1.58</b>  | AF203907         | G protein-coupled receptor 85                              |
| Gpr89_predicte | 128        | 213        | <b>1.67</b>  | BI275972         | G protein-coupled receptor 89 (predicted)                  |
| Glrb           | 128        | 195        | <b>1.53</b>  | NM_053296        | glycine receptor, beta subunit                             |
| Grm3           | 247        | 725        | <b>2.93</b>  | AW522430         | glutamate receptor, metabotropic 3                         |
| Grm5           | 59         | 572        | <b>9.76</b>  | AW526330         | Glutamate receptor, metabotropic 5                         |
| Htr4           | 253        | 148        | <b>0.58</b>  | BF401317         | 5-hydroxytryptamine (serotonin) receptor 4                 |
| <b>Igfbp2</b>  | <b>156</b> | <b>266</b> | <b>1.71</b>  | <b>NM_013122</b> | <b>insulin-like growth factor binding protein 2</b>        |
| Itn2b          | 15         | 100        | <b>6.75</b>  | AW534352         | Integral membrane protein 2B                               |

|                 |           |            |              |               |                                                           |
|-----------------|-----------|------------|--------------|---------------|-----------------------------------------------------------|
| LOC498912       | 170       | 288        | <b>1.69</b>  | AA859108      | similar to Alpha- and gamma-adaptin-binding protein p3    |
| LOC681927 /// I | 66        | 109        | <b>1.65</b>  | BF419095      | similar to SEC24 related gene family, member C            |
| LOC688018       | 74        | 506        | <b>6.82</b>  | BM389412      | similar to SH3-domain binding protein 3                   |
| LOC689560 /// I | 9         | 80         | <b>9.30</b>  | BF418135      | ryanodine receptor 2, cardiac /// ryanodine receptor 2 (c |
| Lphn1           | 181       | 501        | <b>2.76</b>  | AF111099      | latrophilin 1                                             |
| Lrp6_predicted  | 18        | 125        | <b>6.86</b>  | BM391816      | low density lipoprotein receptor-related protein 6 (predi |
| Nab1            | 51        | 78         | <b>1.53</b>  | NM_022856     | Ngfi-A binding protein 1                                  |
| Narg1_predicte  | 20        | 249        | <b>12.33</b> | AW527638      | NMDA receptor-regulated gene 1 (predicted)                |
| Ncald           | 85        | 239        | <b>2.82</b>  | BF420172      | neurocalcin delta                                         |
| Nisch           | 182       | 342        | <b>1.88</b>  | BE108587      | nischarin                                                 |
| Nrp2            | 593       | 364        | <b>0.61</b>  | AA859669      | Neuropilin 2                                              |
| Nrxn1           | 230       | 993        | <b>4.32</b>  | NM_021767     | neurexin 1                                                |
| Nrxn3           | 271       | 170        | <b>0.63</b>  | NM_053817     | neurexin 3                                                |
| Oprl1           | 123       | 81         | <b>0.66</b>  | NM_031569     | opioid receptor-like 1                                    |
| Osbp2_predicte  | 140       | 213        | <b>1.53</b>  | AI112698      | oxysterol binding protein 2 (predicted)                   |
| Osbp1a          | 35        | 121        | <b>3.41</b>  | AI137224      | oxysterol binding protein-like 1A                         |
| Otub1_predicte  | 155       | 331        | <b>2.13</b>  | BI274378      | OTU domain, ubiquitin aldehyde binding 1 (predicted)      |
| P34             | 41        | 102        | <b>2.47</b>  | NM_134398     | p34 protein                                               |
| Pgrmc2          | 84        | 179        | <b>2.14</b>  | AI137488      | progesterone receptor membrane component 2                |
| Plxdc2_predicte | 34        | 242        | <b>7.14</b>  | BE116194      | plexin domain containing 2 (predicted)                    |
| Plxnb1_predicte | 58        | 95         | <b>1.64</b>  | BI294858      | plexin B1 (predicted)                                     |
| RGD1308847_f    | 37        | 81         | <b>2.19</b>  | AI716277      | similar to SPla/Ryanodine receptor SPRY (1J970) (pre      |
| RGD1559552_f    | 24        | 243        | <b>10.01</b> | BF396678      | similar to peroxisome proliferator-activated receptor bin |
| RGD1560070_f    | 92        | 901        | <b>9.75</b>  | BG380409      | similar to ataxin 2-binding protein 1 isoform 2 (predicte |
| RGD1560587_f    | 238       | 590        | <b>2.48</b>  | AW525048      | similar to Eph receptor A4 (predicted)                    |
| Rimbp2          | 66        | 170        | <b>2.59</b>  | BE102826      | RIM binding protein 2                                     |
| Rora_predicted  | 153       | 230        | <b>1.50</b>  | AI235414      | RAR-related orphan receptor alpha (predicted)             |
| Rtn4r           | 46        | 101        | <b>2.20</b>  | NM_053613     | reticulon 4 receptor                                      |
| Sec14l2         | 32        | 95         | <b>2.96</b>  | NM_053801     | SEC14-like 2 (S. cerevisiae)                              |
| Sec61a2_predic  | 840       | 532        | <b>0.63</b>  | BG381529      | Sec61, alpha subunit 2 (S. cerevisiae) (predicted)        |
| Sh3bgr1_predict | 261       | 411        | <b>1.57</b>  | BG672648      | SH3-binding domain glutamic acid-rich protein like (pre   |
| <b>Stxbp1</b>   | <b>65</b> | <b>162</b> | <b>2.48</b>  | <b>U06069</b> | <b>syntaxin binding protein 1</b>                         |
| Tbl1xr1_predict | 27        | 112        | <b>4.12</b>  | AA944938      | transducin (beta)-like 1X-linked receptor 1 (predicted)   |
| Thra            | 15        | 97         | <b>6.44</b>  | M18028        | thyroid hormone receptor alpha                            |
| Thrap2_predicte | 132       | 436        | <b>3.31</b>  | BE109224      | thyroid hormone receptor associated protein 2 (predicte   |
| Wbp4            | 32        | 146        | <b>4.58</b>  | BG663444      | VW domain binding protein 4                               |

### Signaling

| Sample               | F3-Cont    | F3-Vinc    | Vin/Con      | Genbank         | Gene Title                                                |
|----------------------|------------|------------|--------------|-----------------|-----------------------------------------------------------|
| Gene Symbol          | Raw        | Raw        | Ratio        | Genbank         | Gene Title                                                |
| Abi1                 | 311        | 1190       | <b>3.83</b>  | NM_024397       | abl-interactor 1                                          |
| Adnp                 | 37         | 83         | <b>2.25</b>  | NM_022681       | activity-dependent neuroprotective protein                |
| Adrbk1               | 65         | 156        | <b>2.40</b>  | NM_012776       | adrenergic receptor kinase, beta 1                        |
| <b>Agtpbp1_predi</b> | <b>48</b>  | <b>103</b> | <b>2.13</b>  | <b>BF553179</b> | <b>ATP/GTP binding protein 1 (predicted)</b>              |
| Ak1                  | 47         | 82         | <b>1.75</b>  | NM_024349       | adenylate kinase 1                                        |
| Akap13               | 72         | 178        | <b>2.45</b>  | AW526712        | A kinase (PRKA) anchor protein 13                         |
| Anp32a               | 80         | 164        | <b>2.05</b>  | NM_012903       | acidic (leucine-rich) nuclear phosphoprotein 32 family, r |
| Anp32e               | 98         | 149        | <b>1.53</b>  | AI008642        | acidic (leucine-rich) nuclear phosphoprotein 32 family, r |
| Apln                 | 44         | 121        | <b>2.73</b>  | NM_031612       | apelin, AGTRL1 ligand                                     |
| Arhgap1_predic       | 24         | 80         | <b>3.37</b>  | AI535143        | Rho GTPase activating protein 1 (predicted)               |
| Arhgap5              | 23         | 162        | <b>7.07</b>  | BM384008        | Rho GTPase activating protein 5                           |
| Ascc3l1              | 81         | 143        | <b>1.77</b>  | AI502051        | Activating signal cointegrator 1 complex subunit 3-like   |
| Brinp2               | 89         | 154        | <b>1.73</b>  | BF551863        | BMP/retinoic acid-inducible neural-specific protein 2     |
| <b>Camk2a</b>        | <b>565</b> | <b>867</b> | <b>1.53</b>  | <b>BM384558</b> | <b>calcium/calmodulin-dependent protein kinase II, al</b> |
| Camk2b               | 1041       | 2482       | <b>2.38</b>  | NM_021739       | calcium/calmodulin-dependent protein kinase II, beta      |
| Camk2g               | 165        | 930        | <b>5.62</b>  | NM_133605       | calcium/calmodulin-dependent protein kinase II gamma      |
| Camk2n1              | 191        | 400        | <b>2.09</b>  | BE111167        | Calcium/calmodulin-dependent protein kinase II inhibit    |
| Canx                 | 93         | 167        | <b>1.79</b>  | BI297860        | calnexin                                                  |
| Cap1                 | 172        | 434        | <b>2.53</b>  | NM_022383       | CAP, adenylate cyclase-associated protein 1 (yeast)       |
| Cap2                 | 272        | 806        | <b>2.96</b>  | NM_053874       | CAP, adenylate cyclase-associated protein, 2 (yeast)      |
| Cd47                 | 247        | 385        | <b>1.56</b>  | NM_019195       | CD47 antigen (Rh-related antigen, integrin-associated     |
| Cdc42bbp             | 23         | 78         | <b>3.35</b>  | AF021936        | Cdc42 binding protein kinase beta                         |
| Centg2_predicte      | 275        | 650        | <b>2.37</b>  | BF558819        | centaurin, gamma 2 (predicted)                            |
| Centg3_predicte      | 4          | 88         | <b>24.82</b> | AW252124        | centaurin, gamma 3 (predicted)                            |
| <b>Cit</b>           | <b>98</b>  | <b>269</b> | <b>2.75</b>  | <b>AA957183</b> | <b>Citron</b>                                             |
| Cnksr2               | 60         | 124        | <b>2.06</b>  | AF102853        | connector enhancer of kinase suppressor of Ras 2          |
| Csda                 | 162        | 87         | <b>0.54</b>  | AA866458        | cold shock domain protein A                               |
| Csnk1a1              | 158        | 253        | <b>1.60</b>  | U77583          | casein kinase 1, alpha 1                                  |
| Csnk1d               | 83         | 141        | <b>1.71</b>  | L07578          | casein kinase 1, delta                                    |



|                      |           |           |              |                 |                                                                |
|----------------------|-----------|-----------|--------------|-----------------|----------------------------------------------------------------|
| Ctnnb1               | 70        | 162       | <b>2.33</b>  | NM_053357       | catenin (cadherin associated protein), beta 1                  |
| Ehd4                 | 62        | 103       | <b>1.67</b>  | BF395171        | EH-domain containing 4                                         |
| Ensa                 | 117       | 311       | <b>2.65</b>  | BI289922        | endosulfine alpha                                              |
| Epha5                | 27        | 175       | <b>6.49</b>  | BF416432        | EphA5                                                          |
| Farp1_predictec      | 16        | 118       | <b>7.16</b>  | AI547942        | FERM, RhoGEF (Arhgef) and pleckstrin domain protein            |
| Freq                 | 25        | 77        | <b>3.11</b>  | NM_024366       | frequenin homolog (Drosophila)                                 |
| Gapvd1_predicti      | 161       | 247       | <b>1.54</b>  | BE102596        | GTPase activating protein and VPS9 domains 1 (predic           |
| Garnl1               | 92        | 140       | <b>1.52</b>  | AF041107        | GTPase activating RANGAP domain-like 1                         |
| Gnao                 | 189       | 726       | <b>3.85</b>  | AF413212        | guanine nucleotide binding protein, alpha o                    |
| Gnb1                 | 1029      | 526       | <b>0.51</b>  | NM_030987       | guanine nucleotide binding protein, beta 1                     |
| Gnb2                 | 384       | 657       | <b>1.71</b>  | AF277892        | guanine nucleotide binding protein, beta polypeptide 2         |
| Gria2                | 568       | 1541      | <b>2.72</b>  | M85035          | glutamate receptor, ionotropic, AMPA2                          |
| Gria3                | 17        | 84        | <b>4.93</b>  | M85036          | glutamate receptor, ionotropic, AMPA3 (alpha 3)                |
| Grin1a               | 104       | 197       | <b>1.90</b>  | BG664035        | glutamate receptor, ionotropic, N-methyl D-aspartate-lik       |
| Grip1                | 77        | 51        | <b>0.67</b>  | AI408747        | Glutamate receptor interacting protein 1                       |
| Hipk2_predictec      | 73        | 123       | <b>1.69</b>  | BM392321        | homeodomain interacting protein kinase 2 (predicted)           |
| Hpcal4               | 82        | 171       | <b>2.09</b>  | BI296503        | Hippocalcin-like 4                                             |
| Hspa2                | 194       | 129       | <b>0.67</b>  | BF410146        | heat shock 70kDa protein 2                                     |
| Hspa4                | 62        | 153       | <b>2.46</b>  | AF077354        | heat shock protein 4                                           |
| Hspca                | 295       | 2016      | <b>6.82</b>  | BG671521        | heat shock protein 1, alpha                                    |
| Hspcb                | 249       | 904       | <b>3.63</b>  | BI285700        | heat shock 90kDa protein 1, beta                               |
| Iifi271              | 1002      | 585       | <b>0.58</b>  | NM_130743       | interferon, alpha-inducible protein 27-like                    |
| Kalrn                | 60        | 194       | <b>3.22</b>  | NM_032062       | kalirin, RhoGEF kinase                                         |
| Khdrbs1              | 70        | 131       | <b>1.87</b>  | AF393783        | KH domain containing, RNA binding, signal transductio          |
| LOC289606            | 164       | 328       | <b>2.00</b>  | BF404116        | similar to Gamma-aminobutyric-acid receptor alpha-2 s          |
| LOC365949 /// I      | 75        | 247       | <b>3.29</b>  | AI111738        | similar to nemo like kinase /// similar to nemo like kinas     |
| LOC497978            | 103       | 234       | <b>2.26</b>  | AI101639        | similar to diacylglycerol kinase epsilon                       |
| LOC498351            | 295       | 190       | <b>0.64</b>  | BG670238        | similar to signal recognition particle,72 kDa subunit          |
| LOC678826 /// I      | 548       | 883       | <b>1.61</b>  | BI295776        | similar to sorbin and SH3 domain containing 1 isoform :        |
| LOC679252            | 16        | 136       | <b>8.73</b>  | AI070638        | similar to Myeloid/lymphoid or mixed-lineage leukemia          |
| LOC680419            | 218       | 132       | <b>0.61</b>  | AA963364        | Similar to Ras suppressor protein 1                            |
| LOC682488 /// I      | 87        | 178       | <b>2.04</b>  | AI711306        | similar to Ras-related protein Rab-1B                          |
| LOC683917 /// I      | 95        | 353       | <b>3.70</b>  | AI102520        | similar to gamma-aminobutyric acid (GABA(A)) recepto           |
| Lsg1                 | 116       | 30        | <b>0.26</b>  | AA899663        | large subunit GTPase 1 homolog (S. cerevisiae)                 |
| Pygm                 | 33        | 90        | <b>2.70</b>  | AI717476        | muscle glycogen phosphorylase                                  |
| Map4k4_predicti      | 162       | 91        | <b>0.56</b>  | BE117850        | mitogen-activated protein kinase kinase kinase                 |
| Mapk1                | 101       | 221       | <b>2.18</b>  | NM_053842       | mitogen activated protein kinase 1                             |
| Mapk10               | 168       | 263       | <b>1.56</b>  | NM_012806       | mitogen activated protein kinase 10                            |
| Mapk3                | 207       | 355       | <b>1.71</b>  | AF155236        | mitogen activated protein kinase 3                             |
| Mapk8ip              | 144       | 282       | <b>1.96</b>  | AF092450        | mitogen activated protein kinase 8 interacting protein         |
| Mapk8ip3             | 82        | 224       | <b>2.72</b>  | BF553848        | mitogen-activated protein kinase 8 interacting protein 3       |
| Mapk9                | 40        | 136       | <b>3.38</b>  | NM_017322       | mitogen-activated protein kinase 9                             |
| MGC125015            | 55        | 125       | <b>2.28</b>  | AA996838        | similar to PAK/PLC-interacting protein 1                       |
| Nek7_predicted       | 69        | 182       | <b>2.65</b>  | BE117215        | NIMA (never in mitosis gene a)-related expressed kinas         |
| Nkiras1_predict      | 284       | 622       | <b>2.19</b>  | AA997472        | NFKB inhibitor interacting Ras-like protein 1 (predicted)      |
| Notch1               | 55        | 85        | <b>1.55</b>  | BF389398        | Notch gene homolog 1 (Drosophila)                              |
| Ntrk2                | 1283      | 766       | <b>0.60</b>  | BE102996        | Neurotrophic tyrosine kinase, receptor, type 2                 |
| Nucks                | 66        | 273       | <b>4.11</b>  | NM_022799       | nuclear ubiquitous casein kinase and cyclin-dependent          |
| Pacsin1              | 31        | 430       | <b>13.84</b> | NM_017294       | protein kinase C and casein kinase substrate in neuron         |
| Pak3                 | 220       | 421       | <b>1.91</b>  | NM_019210       | p21 (CDKN1A)-activated kinase 3                                |
| Pde10a               | 260       | 587       | <b>2.26</b>  | NM_022236       | phosphodiesterase 10A                                          |
| Pde4b                | 129       | 296       | <b>2.29</b>  | AF202733        | phosphodiesterase 4B, cAMP specific                            |
| Pik3c2a_predicti     | 198       | 321       | <b>1.62</b>  | AI059449        | phosphatidylinositol 3-kinase, C2 domain containing, al        |
| Pik3r2               | 122       | 235       | <b>1.93</b>  | NM_022185       | phosphatidylinositol 3-kinase, regulatory subunit, polyp       |
| Pip5k1a_predict      | 41        | 107       | <b>2.65</b>  | BG153281        | phosphatidylinositol-4-phosphate 5-kinase, type 1, alph        |
| Pip5k2a              | 40        | 87        | <b>2.14</b>  | NM_053926       | phosphatidylinositol-4-phosphate 5-kinase, type II, alph       |
| Pkia                 | 123       | 199       | <b>1.62</b>  | AA996685        | protein kinase inhibitor, alpha                                |
| Plaa                 | 110       | 213       | <b>1.95</b>  | NM_053866       | phospholipase A2, activating protein                           |
| Plekhb2_predict      | 10        | 113       | <b>11.39</b> | AW254369        | <i>pleckstrin homology domain containing, family B (evect</i>  |
| <b>Plekhh1_predi</b> | <b>78</b> | <b>25</b> | <b>0.32</b>  | <b>BI275435</b> | <b>pleckstrin homology domain containing, family H (v</b>      |
| Plekhj1              | 137       | 83        | <b>0.60</b>  | AA848429        | pleckstrin homology domain containing, family J membe          |
| Ppp1ca               | 906       | 1416      | <b>1.56</b>  | NM_031527       | protein phosphatase 1, catalytic subunit, alpha isoform        |
| Ppp1r12a             | 19        | 168       | <b>8.94</b>  | BF406594        | protein phosphatase 1, regulatory (inhibitor) subunit 12       |
| Ppp1r3c              | 69        | 159       | <b>2.30</b>  | AW530361        | protein phosphatase 1, regulatory (inhibitor) subunit 3C       |
| Ppp1r7               | 139       | 248       | <b>1.78</b>  | H32309          | protein phosphatase 1, regulatory (inhibitor) subunit 7        |
| Ppp2r1a              | 57        | 226       | <b>3.97</b>  | BF394544        | protein phosphatase 2 (formerly 2A), regulatory subunit        |
| Ppp2r5e_predict      | 105       | 211       | <b>2.01</b>  | BG664036        | protein phosphatase 2, regulatory subunit B (B56), epsi        |
| Ppp3ca               | 20        | 76        | <b>3.90</b>  | BF388224        | <i>Protein phosphatase 3, catalytic subunit, alpha isoform</i> |
| Ppp3r1               | 87        | 379       | <b>4.37</b>  | NM_017309       | protein phosphatase 3, regulatory subunit B, alpha isof        |

|                       |             |             |              |                  |                                                           |
|-----------------------|-------------|-------------|--------------|------------------|-----------------------------------------------------------|
| Ppp5c                 | 114         | 185         | <b>1.62</b>  | NM_031729        | protein phosphatase 5, catalytic subunit                  |
| Prkaa2                | 22          | 187         | <b>8.41</b>  | NM_023991        | protein kinase, AMP-activated, alpha 2 catalytic subunit  |
| Prkcbp1               | 230         | 602         | <b>2.62</b>  | BM391419         | protein kinase C binding protein 1                        |
| Prkce                 | 618         | 1719        | <b>2.78</b>  | AA799421         | protein kinase C, epsilon                                 |
| <i>Prkce</i>          | 89          | 34          | <b>0.38</b>  | BI301465         | <i>Protein kinase C, epsilon</i>                          |
| Prkwk1                | 52          | 81          | <b>1.55</b>  | NM_053794        | protein kinase, lysine deficient 1                        |
| <b>Ptgds</b>          | <b>2735</b> | <b>4345</b> | <b>1.59</b>  | <b>J04488</b>    | <b>prostaglandin D2 synthase</b>                          |
| Ptp4a2                | 327         | 985         | <b>3.02</b>  | NM_053475        | protein tyrosine phosphatase 4a2                          |
| Ptpn11                | 81          | 45          | <b>0.55</b>  | AI535048         | Protein tyrosine phosphatase, non-receptor type 11        |
| Ptpns1                | 34          | 99          | <b>2.96</b>  | D38468           | protein tyrosine phosphatase, non-receptor type substr.   |
| Ptpnd                 | 48          | 289         | <b>6.08</b>  | L19933           | protein tyrosine phosphatase, receptor type, D            |
| Ptpnf                 | 51          | 263         | <b>5.16</b>  | X83505           | protein tyrosine phosphatase, receptor type, F            |
| <i>Ptpnj</i>          | 139         | 231         | <b>1.67</b>  | <i>NM_017269</i> | <i>protein tyrosine phosphatase, receptor type, J</i>     |
| Rab10                 | 136         | 219         | <b>1.62</b>  | NM_017359        | RAB10, member RAS oncogene family                         |
| Rab11b                | 139         | 298         | <b>2.15</b>  | D01046           | RAB11B, member RAS oncogene family                        |
| Rab14                 | 96          | 706         | <b>7.37</b>  | NM_053589        | RAB14, member RAS oncogene family                         |
| Rab15                 | 41          | 96          | <b>2.31</b>  | BF554320         | RAB15, member RAS oncogene family                         |
| Rab5a                 | 80          | 189         | <b>2.36</b>  | NM_022692        | RAB5A, member RAS oncogene family                         |
| Rab5b_predicte        | 71          | 129         | <b>1.82</b>  | AA996576         | RAB5B, member RAS oncogene family (predicted)             |
| Rab6a                 | 112         | 271         | <b>2.43</b>  | AA686757         | RAB6A, member RAS oncogene family                         |
| Rab7                  | 175         | 314         | <b>1.79</b>  | NM_023950        | RAB7, member RAS oncogene family                          |
| Ralgs2                | 21          | 94          | <b>4.51</b>  | BF525299         | Ral GEF with PH domain and SH3 binding motif 2            |
| Ramp2                 | 252         | 166         | <b>0.66</b>  | NM_031646        | receptor (calcitonin) activity modifying protein 2        |
| Rapgef6_predic        | 29          | 146         | <b>5.04</b>  | BI289486         | Rap guanine nucleotide exchange factor (GEF) 6 (pred      |
| Rasa1                 | 126         | 217         | <b>1.73</b>  | NM_013135        | RAS p21 protein activator 1                               |
| Rasgrf2               | 69          | 183         | <b>2.64</b>  | NM_053721        | RAS protein-specific guanine nucleotide-releasing fact    |
| Rasgrp1               | 82          | 241         | <b>2.95</b>  | AF081196         | RAS guanyl releasing protein 1                            |
| Rasl10b_predic        | 58          | 102         | <b>1.76</b>  | AW919370         | RAS-like, family 10, member B (predicted)                 |
| Rfng                  | 61          | 116         | <b>1.89</b>  | NM_021849        | radical fringe gene homolog (Drosophila)                  |
| RGD1309388_f          | 127         | 561         | <b>4.43</b>  | BF544981         | similar to DIP13 alpha (predicted)                        |
| RGD1311455_f          | 90          | 230         | <b>2.55</b>  | BE108260         | Similar to MAPK-interacting and spindle-stabilizing prot  |
| RGD1560049_f          | 57          | 529         | <b>9.24</b>  | AW520764         | similar to Dual specificity protein phosphatase 3 (T-DSF  |
| RGD1561090_f          | 86          | 659         | <b>7.62</b>  | AI412803         | similar to protein tyrosine phosphatase, receptor type, I |
| RGD1561817_f          | 85          | 129         | <b>1.51</b>  | BG666454         | similar to Traf2 and NCK interacting kinase, splice varia |
| RGD1564560_f          | 27          | 342         | <b>12.73</b> | AA850780         | similar to RCK (predicted)                                |
| Rgs17_predicte        | 124         | 476         | <b>3.83</b>  | AI229118         | regulator of G-protein signaling 17 (predicted)           |
| Rgs4                  | 68          | 176         | <b>2.58</b>  | U27767           | regulator of G-protein signaling 4                        |
| <i>RICS_predictec</i> | 95          | 248         | <b>2.61</b>  | <i>BE097238</i>  | <i>RhoGAP involved in beta-catenin-N-cadherin and NMD</i> |
| Rims1                 | 114         | 224         | <b>1.97</b>  | NM_052829        | regulating synaptic membrane exocytosis 1                 |
| Riok3_predictec       | 40          | 79          | <b>1.98</b>  | BE126478         | RIO kinase 3 (yeast) (predicted)                          |
| Rnd3                  | 29          | 98          | <b>3.37</b>  | AI598323         | Rho family GTPase 3                                       |
| Sbf1_predicted        | 36          | 156         | <b>4.39</b>  | BF554377         | SET binding factor 1 (predicted)                          |
| Set_predicted         | 601         | 1057        | <b>1.76</b>  | BG381708         | SET translocation (predicted)                             |
| Sipa111               | 78          | 180         | <b>2.30</b>  | AF026504         | signal-induced proliferation-associated 1 like 1          |
| Snx10                 | 39          | 105         | <b>2.73</b>  | AI007889         | sorting nexin 10                                          |
| Snx12_predicte        | 63          | 229         | <b>3.65</b>  | BF389280         | Sorting nexin 12 (predicted)                              |
| Snx27                 | 34          | 489         | <b>14.57</b> | AA900057         | sorting nexin family member 27                            |
| Snx4_predicted        | 67          | 179         | <b>2.66</b>  | AI029221         | Sorting nexin 4 (predicted)                               |
| Shoc2                 | 36          | 167         | <b>4.66</b>  | AI112329         | soc-2 (suppressor of clear) homolog (C. elegans)          |
| Sorcs3_predicte       | 35          | 95          | <b>2.73</b>  | BF409626         | sortilin-related VPS10 domain containing receptor 3 (pr   |
| Synj2                 | 75          | 138         | <b>1.86</b>  | AY034051         | synaptojanin 2                                            |
| Taok1                 | 34          | 145         | <b>4.21</b>  | AF084205         | TAO kinase 1                                              |
| Tbl1x_predictec       | 449         | 294         | <b>0.65</b>  | BE108225         | transducin (beta)-like 1 X-linked (predicted)             |
| Tiam1                 | 22          | 87          | <b>3.91</b>  | BM389265         | T-cell lymphoma invasion and metastasis 1                 |
| Tollip_predicted      | 85          | 143         | <b>1.68</b>  | BE112982         | toll interacting protein (predicted)                      |
| Ywhab                 | 214         | 493         | <b>2.31</b>  | BG380730         | tyrosine 3-monooxygenase/tryptophan 5-monooxygena         |

### Transcription

| Sample          | F3-Cont | F3-Vinc | Vin/Con     | Gene Symbol | Gene Title                                               |
|-----------------|---------|---------|-------------|-------------|----------------------------------------------------------|
| Ahctf1_predicte | 49      | 78      | <b>1.60</b> | BF396355    | AT hook containing transcription factor 1 (predicted)    |
| Ahdc1_predicte  | 32      | 109     | <b>3.40</b> | BG376923    | AT hook, DNA binding motif, containing 1 (predicted)     |
| Ank3            | 116     | 194     | <b>1.68</b> | AJ428573    | ankyrin 3, epithelial                                    |
| Ankrd52_predic  | 52      | 294     | <b>5.60</b> | AA964250    | ankyrin repeat domain 52 (predicted)                     |
| Arid2_predicted | 46      | 110     | <b>2.37</b> | BI289741    | AT rich interactive domain 2 (Arid-rfx like) (predicted) |
| Arid4a_predicte | 24      | 138     | <b>5.70</b> | BF391127    | AT rich interactive domain 4A (Rbp1 like) (predicted)    |
| Arid4b          | 66      | 135     | <b>2.07</b> | NM_053421   | AT rich interactive domain 4B (Rbp1 like)                |
| Basp1           | 749     | 1185    | <b>1.58</b> | NM_022300   | brain abundant, membrane attached signal protein 1       |
| Bcl11b_predicte | 14      | 120     | <b>8.85</b> | BF398531    | B-cell leukemia/lymphoma 11B (predicted)                 |

|                  |            |            |              |                 |                                                              |
|------------------|------------|------------|--------------|-----------------|--------------------------------------------------------------|
| Bcr_predicted    | 91         | 627        | <b>6.87</b>  | BE120831        | breakpoint cluster region (predicted)                        |
| Bhlhb2           | 498        | 299        | <b>0.60</b>  | AI548256        | Basic helix-loop-helix domain containing, class B2           |
| Bicap            | 53         | 101        | <b>1.89</b>  | NM_133582       | bladder cancer associated protein homolog (human)            |
| Cbfa211_predict  | 55         | 107        | <b>1.96</b>  | BE105678        | CBFA2T1 identified gene homolog (human) (predicted)          |
| Cdc42se1         | 252        | 163        | <b>0.65</b>  | BI284508        | CDC42 small effector 1                                       |
| Ddx17            | 67         | 141        | <b>2.11</b>  | BI296754        | DEAD (Asp-Glu-Ala-Asp) box polypeptide 17                    |
| Ddx24            | 70         | 652        | <b>9.32</b>  | AW252511        | DEAD (Asp-Glu-Ala-Asp) box polypeptide 24                    |
| Ddx3x            | 32         | 117        | <b>3.64</b>  | BF391513        | DEAD/H (Asp-Glu-Ala-Asp/His) box polypeptide 3, X-irr        |
| Dhx36_predicte   | 27         | 832        | <b>31.27</b> | BE114021        | DEAH (Asp-Glu-Ala-His) box polypeptide 36 (predicted)        |
| Dmtf1            | 807        | 529        | <b>0.66</b>  | BE098802        | cyclin D binding myb-like transcription factor 1             |
| <b>Dnaja4</b>    | <b>17</b>  | <b>79</b>  | <b>4.64</b>  | <b>BF565278</b> | <b>DnaJ (Hsp40) homolog, subfamily A, member 4</b>           |
| Dnajb1_predicte  | 137        | 226        | <b>1.65</b>  | BM384926        | DnaJ (Hsp40) homolog, subfamily B, member 1 (predic          |
| Dnajb6           | 10         | 75         | <b>7.88</b>  | AW528827        | DnaJ (Hsp40) homolog, subfamily B, member 6                  |
| Dnajc7           | 126        | 367        | <b>2.92</b>  | BI285682        | DnaJ (Hsp40) homolog, subfamily C, member 7                  |
| Dnd1             | 36         | 89         | <b>2.48</b>  | BF552813        | dead end homolog 1 (zebrafish)                               |
| Etv1_predicted   | 72         | 131        | <b>1.83</b>  | AI112936        | Ets variant gene 1 (predicted)                               |
| Fbxo9            | 160        | 252        | <b>1.58</b>  | BG669135        | F-box only protein 9                                         |
| Fbxw2_predicte   | 49         | 79         | <b>1.63</b>  | AW915859        | F-box and WD-40 domain protein 2 (predicted)                 |
| Foxo1a           | 13         | 153        | <b>11.98</b> | BI295511        | forkhead box O1A                                             |
| Fubp1            | 121        | 77         | <b>0.64</b>  | AI233709        | Far upstream element (FUSE) binding protein 1                |
| Fyn              | 191        | 358        | <b>1.88</b>  | NM_012755       | fyn proto-oncogene                                           |
| Gtf2i            | 83         | 146        | <b>1.76</b>  | AI715835        | general transcription factor II I                            |
| Hip1             | 282        | 159        | <b>0.56</b>  | BE110671        | huntingtin interacting protein 1                             |
| Impad1           | 119        | 287        | <b>2.41</b>  | BF396528        | inositol monophosphatase domain containing 1                 |
| Ing3             | 58         | 169        | <b>2.92</b>  | BI296751        | inhibitor of growth family, member 3                         |
| Jun              | 179        | 331        | <b>1.84</b>  | BI288619        | Jun oncogene                                                 |
| Kit              | 33         | 76         | <b>2.29</b>  | NM_022264       | v-kit Hardy-Zuckerman 4 feline sarcoma viral oncogene        |
| Klf6             | 109        | 186        | <b>1.71</b>  | NM_031642       | Kruppel-like factor 6                                        |
| Khlh24           | 116        | 451        | <b>3.90</b>  | BF550390        | kelch-like 24 (Drosophila)                                   |
| LOC303057        | 31         | 116        | <b>3.71</b>  | AI411326        | similar to step II splicing factor SLU7; DNA segment, CI     |
| LOC309957        | 81         | 437        | <b>5.41</b>  | BI281877        | similar to myocyte enhancer factor 2C                        |
| LOC362154 /// I  | 215        | 749        | <b>3.49</b>  | BF550329        | brain zinc finger protein /// similar to brain Zn-finger pro |
| LOC500591        | 127        | 720        | <b>5.66</b>  | BF564825        | similar to calmodulin-binding transcription activator 1      |
| LOC678886 /// I  | 405        | 687        | <b>1.70</b>  | BE109666        | similar to Enhancer of rudimentary homolog                   |
| LOC679725 /// I  | 35         | 133        | <b>3.81</b>  | BI296626        | similar to MASK-4E-BP3 protein                               |
| LOC680802 /// I  | 20         | 83         | <b>4.11</b>  | BE101875        | similar to Zinc finger protein 45 (BRC1744)                  |
| LOC685277        | 131        | 721        | <b>5.50</b>  | BE104102        | Similar to liver-specific bHLH-Zip transcription factor      |
| <b>LOC685374</b> | <b>100</b> | <b>151</b> | <b>1.52</b>  | <b>BG671371</b> | <b>similar to ankyrin repeat domain 13c</b>                  |
| LOC685707 /// I  | 31         | 83         | <b>2.64</b>  | BF387266        | neuron navigator 1 (predicted) /// similar to neuron navi    |
| LOC685865        | 280        | 178        | <b>0.64</b>  | BG371744        | Similar to zinc finger protein 458                           |
| LOC686480 /// I  | 237        | 91         | <b>0.38</b>  | AW528215        | similar to Protein C12orf11 (Sarcoma antigen NY-SAR-1        |
| LOC687516        | 112        | 180        | <b>1.61</b>  | BI296193        | similar to zinc finger protein 146                           |
| LOC688133        | 255        | 170        | <b>0.67</b>  | BE114154        | similar to mbt domain containing 1                           |
| LOC688144 /// I  | 65         | 137        | <b>2.12</b>  | BE105705        | similar to ankyrin repeat domain 40                          |
| LOC690038        | 65         | 113        | <b>1.74</b>  | AI009167        | Similar to Bcl2-associated athanogene 2                      |
| Mcf2l            | 20         | 80         | <b>4.00</b>  | NM_053951       | mcf.2 transforming sequence-like                             |
| Mll              | 74         | 120        | <b>1.62</b>  | BG671918        | myeloid/lymphoid or mixed-lineage leukemia                   |
| Mll5             | 33         | 227        | <b>6.77</b>  | BE117891        | myeloid/lymphoid or mixed-lineage leukemia 5 (trithora:      |
| Mpp5_predictec   | 39         | 235        | <b>6.08</b>  | AI072027        | membrane protein, palmitoylated 5 (MAGUK p55 subfa           |
| Mpp6_predictec   | 89         | 193        | <b>2.17</b>  | BE097259        | membrane protein, palmitoylated 6 (MAGUK p55 subfa           |
| Mta1             | 53         | 103        | <b>1.93</b>  | AJ132046        | metastasis associated 1                                      |
| Mtpn             | 129        | 334        | <b>2.59</b>  | AI711244        | myotrophin                                                   |
| Mxd4_predictec   | 34         | 113        | <b>3.35</b>  | BI274201        | Max dimerization protein 4 (predicted)                       |
| Mxi1             | 52         | 103        | <b>1.96</b>  | NM_013160       | Max interacting protein 1                                    |
| Mycl1            | 108        | 186        | <b>1.72</b>  | BI300996        | v-myc myelocytomatosis viral oncogene homolog 1, lur         |
| Ncor1            | 37         | 240        | <b>6.54</b>  | BE100543        | nuclear receptor co-repressor 1                              |
| Nfia             | 36         | 80         | <b>2.23</b>  | D78019          | nuclear factor I/A                                           |
| Nfib             | 178        | 842        | <b>4.73</b>  | BE099050        | nuclear factor I/B                                           |
| Nfix             | 48         | 290        | <b>6.09</b>  | BF420722        | nuclear factor I/X                                           |
| Nfyc             | 38         | 84         | <b>2.23</b>  | NM_012866       | nuclear transcription factor-Y gamma                         |
| Nol6_predicted   | 74         | 114        | <b>1.53</b>  | AI409184        | nucleolar protein family 6 (RNA-associated) (predicted)      |
| Nolc1            | 114        | 175        | <b>1.54</b>  | M94288          | nucleolar and coiled-body phosphoprotein 1                   |
| Nono             | 121        | 222        | <b>1.84</b>  | BF555394        | non-POU domain containing, octamer-binding                   |
| Npat_predicted   | 101        | 67         | <b>0.66</b>  | AI014116        | nuclear protein in the AT region (predicted)                 |
| Npat_predicted   | 122        | 64         | <b>0.52</b>  | BF391717        | Nuclear protein in the AT region (predicted)                 |
| Nr1h2            | 62         | 114        | <b>1.84</b>  | AI169222        | nuclear receptor subfamily 1, group H, member 2              |
| Nr2f2            | 10         | 79         | <b>7.83</b>  | NM_080778       | nuclear receptor subfamily 2, group F, member 2              |
| Nr2f6            | 56         | 91         | <b>1.63</b>  | NM_139113       | nuclear receptor subfamily 2, group F, member 6              |
| Nr4a2            | 61         | 118        | <b>1.94</b>  | U72345          | nuclear receptor subfamily 4, group A, member 2              |

|                        |            |            |              |                 |                                                                |
|------------------------|------------|------------|--------------|-----------------|----------------------------------------------------------------|
| Nr4a3                  | 525        | 1096       | <b>2.09</b>  | NM_031628       | nuclear receptor subfamily 4, group A, member 3                |
| <b>Nrip3_predicted</b> | <b>135</b> | <b>237</b> | <b>1.76</b>  | <b>BI288541</b> | <b>Nuclear receptor interacting protein 3 (predicted)</b>      |
| NTF2                   | 70         | 117        | <b>1.67</b>  | BE109988        | nuclear transport factor 2                                     |
| Nucb1                  | 259        | 397        | <b>1.53</b>  | Z36277          | nucleobindin 1                                                 |
| Os-9                   | 132        | 88         | <b>0.66</b>  | AI169058        | amplified in osteosarcoma                                      |
| Plag1                  | 69         | 115        | <b>1.66</b>  | BI290063        | pleiomorphic adenoma gene 1                                    |
| Pogz_predicted         | 34         | 75         | <b>2.23</b>  | AI177507        | pogo transposable element with ZNF domain (predicted)          |
| Psip1                  | 72         | 111        | <b>1.54</b>  | BF397366        | PC4 and SFRS1 interacting protein 1                            |
| pur-beta               | 52         | 92         | <b>1.79</b>  | BI284455        | transcription factor Pur-beta                                  |
| Rala                   | 87         | 344        | <b>3.96</b>  | NM_031093       | v-ral simian leukemia viral oncogene homolog A (ras re         |
| Recc1                  | 137        | 476        | <b>3.47</b>  | BM391856        | replication factor C 1                                         |
| Rexo4                  | 44         | 102        | <b>2.31</b>  | AI237143        | REX4, RNA exonuclease 4 homolog (S. cerevisiae)                |
| RGD1305133             | 36         | 352        | <b>9.69</b>  | BE116128        | similar to Ab2-008                                             |
| RGD1306327             | 169        | 457        | <b>2.71</b>  | AW530286        | similar to downregulated in renal cell carcinoma               |
| RGD1307526             | 292        | 190        | <b>0.65</b>  | BE114469        | similar to modulator of estrogen induced transcription         |
| RGD1310712_f           | 68         | 127        | <b>1.87</b>  | BI297740        | similar to EMSY protein (predicted)                            |
| RGD1562348_f           | 338        | 811        | <b>2.40</b>  | BE117929        | similar to ankyrin repeat domain protein 17 isoform b (p       |
| RGD1562639_f           | 49         | 86         | <b>1.74</b>  | BG670537        | similar to c-myc promoter binding protein (predicted)          |
| RGD1562686_f           | 37         | 163        | <b>4.41</b>  | BI288731        | similar to genetic suppressor element 1 (predicted)            |
| <i>RGD1563119_f</i>    | <i>125</i> | <i>841</i> | <i>6.75</i>  | <i>BE104219</i> | <i>similar to MADS box transcription enhancer factor 2, pc</i> |
| RGD1564056_f           | 2          | 77         | <b>51.63</b> | AI500735        | similar to cellular repressor of E1A-stimulated genes 2        |
| RGD1565099_f           | 10         | 174        | <b>17.42</b> | AI045857        | similar to BTEB3 protein (predicted)                           |
| RGD1565496_f           | 180        | 401        | <b>2.22</b>  | BF283779        | similar to Butyrate-induced transcript 1 (predicted)           |
| RGD1565549_f           | 88         | 307        | <b>3.47</b>  | BE113614        | similar to polybromo-1 (predicted)                             |
| RGD1565591_f           | 140        | 262        | <b>1.87</b>  | BG380847        | similar to Ski protein (predicted)                             |
| RGD1565646_f           | 32         | 121        | <b>3.74</b>  | BF548737        | similar to SOX2 protein (predicted)                            |
| Rtel1                  | 83         | 53         | <b>0.64</b>  | BI274548        | regulator of telomere elongation helicase 1                    |
| Sdccag33_pred          | 131        | 62         | <b>0.48</b>  | BF411100        | serologically defined colon cancer antigen 33 (predicted)      |
| Sertad2                | 59         | 146        | <b>2.46</b>  | BI295862        | SERTA domain containing 2                                      |
| Sp1                    | 39         | 163        | <b>4.22</b>  | AI705174        | Sp1 transcription factor                                       |
| Sreb1                  | 37         | 100        | <b>2.74</b>  | AF286470        | sterol regulatory element binding factor 1                     |
| Sreb2                  | 763        | 482        | <b>0.63</b>  | AI170663        | sterol regulatory element binding factor 2 (predicted)         |
| Sox4_predicted         | 66         | 101        | <b>1.53</b>  | BI297183        | SRY-box containing gene 4 (predicted)                          |
| Tcf20                  | 108        | 168        | <b>1.55</b>  | BF394639        | transcription factor 20                                        |
| Tcf4                   | 269        | 1307       | <b>4.86</b>  | NM_053369       | transcription factor 4                                         |
| Thoc2_predicted        | 26         | 139        | <b>5.26</b>  | AI556851        | THO complex 2 (predicted)                                      |
| Tnks2_predicted        | 51         | 121        | <b>2.39</b>  | H32233          | tankyrase, TRF1-interacting ankyrin-related ADP-ribose         |
| Tox_predicted          | 64         | 107        | <b>1.69</b>  | AI101139        | thymocyte selection-associated HMG box gene (predic            |
| Tpr                    | 9          | 98         | <b>11.44</b> | BE118639        | translocated promoter region                                   |
| Tspyl4                 | 629        | 1359       | <b>2.16</b>  | BI281738        | TSPY-like 4                                                    |
| Ubn1_predicted         | 10         | 108        | <b>10.94</b> | AI578566        | ubnuclein 1 (predicted)                                        |
| Ubtf                   | 51         | 90         | <b>1.77</b>  | AI407688        | upstream binding transcription factor, RNA polymerase          |
| Usf1                   | 59         | 129        | <b>2.20</b>  | NM_031777       | upstream transcription factor 1                                |
| VeZF1_predicted        | 41         | 77         | <b>1.86</b>  | BI284190        | vascular endothelial zinc finger 1 (predicted)                 |
| Zbtb20_predicted       | 155        | 543        | <b>3.50</b>  | BF415114        | zinc finger and BTB domain containing 20 (predicted)           |
| Zbtb4_predicted        | 1082       | 681        | <b>0.63</b>  | BM384146        | zinc finger and BTB domain containing 4 (predicted)            |
| Zcchc7_predicted       | 74         | 285        | <b>3.84</b>  | AI535316        | Zinc finger, CCHC domain containing 7 (predicted)              |
| Zfhx1b                 | 28         | 176        | <b>6.28</b>  | BG377397        | zinc finger homeobox 1b                                        |
| Zfhx2                  | 10         | 83         | <b>7.96</b>  | BI284196        | zinc finger homeobox 2                                         |
| Zfp179                 | 553        | 368        | <b>0.67</b>  | AF054586        | zinc finger protein 179                                        |
| Zfp180                 | 542        | 880        | <b>1.62</b>  | U41164          | zinc finger protein 180                                        |
| Zfp238                 | 29         | 112        | <b>3.89</b>  | NM_022678       | zinc finger protein 238                                        |
| Zfp265                 | 111        | 182        | <b>1.64</b>  | AF013965        | zinc finger protein 265                                        |
| Zfp365                 | 70         | 157        | <b>2.23</b>  | BF408799        | zinc finger protein 365                                        |
| Zfp91                  | 60         | 710        | <b>11.78</b> | BE111631        | zinc finger protein 91                                         |
| Znf142_predicted       | 46         | 93         | <b>2.00</b>  | BE117672        | Zinc finger protein 142 (clone pHZ-49) (predicted)             |
| Znf292                 | 11         | 218        | <b>19.22</b> | BF388585        | zinc finger protein 292                                        |
| ---                    | 104        | 427        | <b>4.13</b>  | BE099838        | Non-coding RNA expressed in the brain, repeat sequer           |
| ---                    | 1036       | 3621       | <b>3.49</b>  | AA963228        | Non-coding RNA expressed in the brain, repeat sequer           |

#### Translation & Protein Modification

| Sample      | F3-Cont | F3-Vinc | Vin/Con     | Genbank   | Gene Title                                           |
|-------------|---------|---------|-------------|-----------|------------------------------------------------------|
| Gene Symbol | Raw     | Raw     | Ratio       |           |                                                      |
| Adarb1      | 32      | 117     | <b>3.67</b> | NM_012894 | adenosine deaminase, RNA-specific, B1                |
| Arf1        | 478     | 955     | <b>2.00</b> | NM_022518 | ADP-ribosylation factor 1                            |
| Arf3        | 129     | 298     | <b>2.32</b> | NM_080904 | ADP-ribosylation factor 3                            |
| Arl1        | 350     | 554     | <b>1.58</b> | NM_022385 | ADP-ribosylation factor-like 1                       |
| Arl2bp      | 81      | 223     | <b>2.74</b> | BF567478  | ADP-ribosylation factor-like 2 binding protein       |
| Arl6ip5     | 322     | 584     | <b>1.82</b> | NM_023972 | ADP-ribosylation factor-like 6 interacting protein 5 |

|                        |      |      |              |           |                                                                |
|------------------------|------|------|--------------|-----------|----------------------------------------------------------------|
| <i>Brunol4_predict</i> | 107  | 55   | <b>0.52</b>  | AW524497  | <i>Bruno-like 4, RNA binding protein (Drosophila) (predict</i> |
| Cct6a                  | 33   | 76   | <b>2.34</b>  | AA875047  | Chaperonin subunit 6a (zeta)                                   |
| Cugbp1                 | 271  | 474  | <b>1.75</b>  | BF408840  | CUG triplet repeat, RNA binding protein 1                      |
| Cugbp2                 | 94   | 209  | <b>2.23</b>  | AF090695  | CUG triplet repeat, RNA binding protein 2                      |
| Dazap2                 | 263  | 425  | <b>1.62</b>  | AI102612  | DAZ associated protein 2                                       |
| Eif2s3x                | 32   | 97   | <b>3.07</b>  | BG662620  | eukaryotic translation initiation factor 2, subunit 3, struc   |
| Eif4a1                 | 340  | 597  | <b>1.76</b>  | BI284436  | eukaryotic translation initiation factor 4A1                   |
| Eif4ebp2               | 189  | 311  | <b>1.64</b>  | BF419161  | eukaryotic translation initiation factor 4E binding protei     |
| Eif4g2 /// Eif4g2      | 230  | 406  | <b>1.77</b>  | BG672378  | eukaryotic translation initiation factor 4 gamma, 2 /// eul    |
| Eif5                   | 116  | 928  | <b>8.03</b>  | BE107346  | eukaryotic translation initiation factor 5                     |
| Eif5a                  | 590  | 1119 | <b>1.90</b>  | BI283681  | eukaryotic translation initiation factor 5A                    |
| Eif5b /// LOC68        | 77   | 147  | <b>1.90</b>  | BE117773  | eukaryotic translation initiation factor 5B /// similar to Eu  |
| Eprs                   | 49   | 282  | <b>5.79</b>  | BF553211  | glutamyl-prolyl-tRNA synthetase                                |
| Etf1                   | 183  | 293  | <b>1.60</b>  | BF285301  | eukaryotic translation termination factor 1                    |
| Hnrpa2b1_pred          | 64   | 213  | <b>3.33</b>  | BG666358  | heterogeneous nuclear ribonucleoprotein A2/B1 (predic          |
| Hnrpa3                 | 103  | 181  | <b>1.76</b>  | AI409455  | Heterogeneous nuclear ribonucleoprotein A3                     |
| Hnrpu                  | 829  | 1264 | <b>1.52</b>  | AI177494  | heterogeneous nuclear ribonucleoprotein U                      |
| Hnrpu1_predict         | 69   | 108  | <b>1.56</b>  | BG381219  | heterogeneous nuclear ribonucleoprotein U-like 1 (pred         |
| Khsrp                  | 251  | 750  | <b>2.98</b>  | BI295086  | KH-type splicing regulatory protein                            |
| Larp5_predictec        | 266  | 170  | <b>0.64</b>  | AI228249  | La ribonucleoprotein domain family, member 5 (predicte         |
| LOC297481              | 106  | 238  | <b>2.24</b>  | AI575608  | similar to eukaryotic translation initiation factor 4E mem     |
| LOC502603              | 38   | 146  | <b>3.86</b>  | AI145768  | similar to splicing factor p54                                 |
| LOC680726              | 163  | 248  | <b>1.52</b>  | AW144676  | similar to RNA binding motif, single stranded interacting      |
| LOC686858 /// I        | 73   | 110  | <b>1.51</b>  | AW531791  | similar to small nuclear RNA activating complex, polype        |
| Pabpn1                 | 358  | 555  | <b>1.55</b>  | AW525563  | poly(A) binding protein, nuclear 1                             |
| Papola_predicte        | 61   | 299  | <b>4.88</b>  | BE108853  | poly (A) polymerase alpha (predicted)                          |
| Pum1_predictec         | 54   | 140  | <b>2.58</b>  | BI282129  | pumilio 1 (Drosophila) (predicted)                             |
| Qki                    | 143  | 240  | <b>1.68</b>  | BE102226  | Quaking homolog, KH domain RNA binding (mouse)                 |
| RAMP4                  | 79   | 138  | <b>1.75</b>  | AI103695  | ribosome associated membrane protein 4                         |
| Rbm14                  | 27   | 75   | <b>2.76</b>  | BG670091  | RNA binding motif protein 14                                   |
| Rbm25_predicte         | 54   | 210  | <b>3.92</b>  | AW434972  | RNA binding motif protein 25 (predicted) /// similar to RI     |
| Rbm5                   | 261  | 777  | <b>2.98</b>  | BI293987  | RNA binding motif protein 5                                    |
| Rbm9_predictec         | 90   | 543  | <b>6.04</b>  | BE111095  | RNA binding motif protein 9 (predicted)                        |
| RGD1560397_f           | 447  | 808  | <b>1.81</b>  | BF284305  | similar to RNA-binding protein Musashi2-S (predicted)          |
| Rnase4                 | 191  | 290  | <b>1.52</b>  | NM_020082 | ribonuclease, RNase A family 4                                 |
| Rnpc2                  | 185  | 390  | <b>2.11</b>  | BG372903  | RNA-binding region (RNP1, RRM) containing 2                    |
| Rps6ka5_predic         | 21   | 154  | <b>7.26</b>  | AI045780  | ribosomal protein S6 kinase, polypeptide 5 (predicted)         |
| Serpbp1                | 1544 | 2586 | <b>1.68</b>  | AF388527  | Serpine1 mRNA binding protein 1                                |
| Sf3b1                  | 66   | 1024 | <b>15.56</b> | BM384277  | splicing factor 3b, subunit 1                                  |
| Sf3b2_predictec        | 39   | 99   | <b>2.52</b>  | BE098910  | splicing factor 3b, subunit 2 (predicted)                      |
| Tsn                    | 90   | 181  | <b>2.02</b>  | NM_021762 | translin                                                       |

#### Miscellaneous & Unknown

| Sample          | F3-Cont | F3-Vinc | Vin/Con      | Genbank  | Gene Title                                                |
|-----------------|---------|---------|--------------|----------|-----------------------------------------------------------|
| Gene Symbol     | Raw     | Raw     | Ratio        | Genbank  | Gene Title                                                |
| ---             | 93      | 200     | <b>2.14</b>  | AW535280 | Retroviral-like ovarian specific transcript 30-1 mRNA     |
| ---             | 249     | 468     | <b>1.88</b>  | BI303933 | Transcribed locus, strongly similar to XP_226779.4 zin    |
| Aff4_predicted  | 5       | 86      | <b>16.45</b> | AI556957 | AF4/FMR2 family, member 4 (predicted)                     |
| Dmxl1_predicte  | 37      | 100     | <b>2.68</b>  | AA924048 | Dmx-like 1 (predicted)                                    |
| Fytd1           | 16      | 107     | <b>6.53</b>  | AI501447 | forty-two-three domain containing 1                       |
| Gramd3          | 101     | 260     | <b>2.58</b>  | C06752   | GRAM domain containing 3                                  |
| LOC289378       | 117     | 70      | <b>0.60</b>  | BI288621 | similar to B0432.8                                        |
| LOC308398       | 49      | 101     | <b>2.06</b>  | BE107128 | similar to F28C1.3a                                       |
| LOC363544       | 379     | 241     | <b>0.64</b>  | AI012506 | similar to 2610111M03Rik protein                          |
| LOC498962       | 118     | 74      | <b>0.63</b>  | BM387366 | similar to C50H11.1                                       |
| LOC681715 /// I | 48      | 177     | <b>3.67</b>  | BF416086 | similar to CG9047-PA, isoform A                           |
| LOC683839 /// I | 98      | 217     | <b>2.22</b>  | AW921279 | hypothetical protein LOC683839 /// hypothetical protein   |
| LOC686503 /// I | 88      | 200     | <b>2.27</b>  | AA944330 | similar to CDC42 small effector 2 (predicted) /// hypothe |
| LOC687166 /// I | 51      | 120     | <b>2.37</b>  | BF420090 | similar to gene trap ROSA b-geo 22                        |
| LOC690789 /// I | 81      | 210     | <b>2.59</b>  | AI104518 | similar to product is unknown~seizure-related gene (pr    |
| Lysmd3          | 78      | 175     | <b>2.26</b>  | AI071181 | LysM, putative peptidoglycan-binding, domain containir    |
| Mfhas1_predict  | 49      | 140     | <b>2.88</b>  | AI136864 | malignant fibrous histiocytoma amplified sequence 1 (p    |
| MGC94335        | 45      | 78      | <b>1.72</b>  | BF404452 | similar to hypothetical protein FLJ22555                  |
| Nudcd1_predict  | 72      | 116     | <b>1.61</b>  | AI408455 | NudC domain containing 1 (predicted)                      |
| Ociad1          | 99      | 59      | <b>0.60</b>  | BI275477 | OClA domain containing 1                                  |
| Perq1_predicte  | 16      | 101     | <b>6.13</b>  | AW526967 | PERQ amino acid rich, with GYF domain 1 (predicted)       |
| PNAS-4          | 154     | 500     | <b>3.25</b>  | AW913871 | CGI-146 protein                                           |
| RGD1306101_f    | 37      | 233     | <b>6.27</b>  | BE095778 | similar to 4933407C03Rik protein (predicted)              |
| RGD1306694_f    | 87      | 142     | <b>1.64</b>  | BF523573 | similar to hypothetical protein (predicted)               |

|                     |            |            |              |                 |                                                           |
|---------------------|------------|------------|--------------|-----------------|-----------------------------------------------------------|
| RGD1307615_f        | 25         | 142        | <b>5.80</b>  | AI407061        | similar to hypothetical protein FLJ13045 (predicted)      |
| RGD1307729_f        | 68         | 113        | <b>1.65</b>  | BF419602        | similar to KIAA0853 protein (predicted)                   |
| RGD1307907_f        | 158        | 99         | <b>0.63</b>  | AI146080        | similar to hypothetical protein FLJ14681 (predicted)      |
| RGD1307981_f        | 78         | 144        | <b>1.85</b>  | BF408881        | similar to cisplatin resistance-associated overexpresser  |
| RGD1308329_f        | 178        | 288        | <b>1.62</b>  | BM390702        | similar to KIAA0869 protein (predicted)                   |
| RGD1308795_f        | 42         | 129        | <b>3.05</b>  | AW143311        | similar to hypothetical protein FLJ12994 (predicted)      |
| RGD1309054_f        | 137        | 248        | <b>1.82</b>  | AI231159        | similar to FKSG26 protein (predicted)                     |
| RGD1309450_f        | 58         | 91         | <b>1.57</b>  | BI291600        | similar to KIAA2010 protein (predicted)                   |
| RGD1309550          | 222        | 340        | <b>1.53</b>  | BI295047        | similar to hypothetical protein D12Erd771e                |
| RGD1309752          | 15         | 159        | <b>10.91</b> | AW524173        | Similar to hypothetical protein D630010C10                |
| RGD1309995_f        | 22         | 113        | <b>5.20</b>  | BF398054        | similar to CG13957-PA (predicted)                         |
| RGD1310052_f        | 34         | 77         | <b>2.26</b>  | BF561001        | similar to hypothetical protein FLJ40362 (predicted)      |
| RGD1310139_f        | 167        | 107        | <b>0.64</b>  | AI144739        | Similar to KIAA0303 (predicted)                           |
| RGD1310433_f        | 50         | 105        | <b>2.11</b>  | AW254450        | similar to mKIAA1757 protein (predicted)                  |
| RGD1310474_f        | 9          | 110        | <b>12.14</b> | BF567629        | similar to KIAA0423 (predicted)                           |
| RGD1311595          | 138        | 569        | <b>4.13</b>  | BE107859        | similar to KIAA2026 protein                               |
| RGD1311678          | 187        | 674        | <b>3.61</b>  | AW524670        | Similar to 4921517L17Rik protein                          |
| <b>RGD1311958_f</b> | <b>104</b> | <b>388</b> | <b>3.74</b>  | <b>BF563206</b> | <b>similar to 6430514L14Rik protein (predicted)</b>       |
| RGD1312005_f        | 72         | 132        | <b>1.83</b>  | BF392349        | similar to DD1 (predicted)                                |
| <b>RGD1559605_f</b> | <b>17</b>  | <b>409</b> | <b>24.57</b> | <b>BE101933</b> | <b>Similar to hypothetical protein FLJ25477 isoform 2</b> |
| RGD1559693_f        | 69         | 147        | <b>2.11</b>  | BF400799        | similar to Hypothetical protein 6330514E13 (predicted)    |
| RGD1559930          | 20         | 151        | <b>7.50</b>  | AW920445        | similar to mKIAA0256 protein (predicted)                  |
| RGD1560834_f        | 115        | 256        | <b>2.23</b>  | BE108367        | similar to FRBZ1 protein (FRBZ1) (predicted)              |
| RGD1560924_f        | 37         | 161        | <b>4.38</b>  | AI011501        | similar to C230080I20Rik protein (predicted)              |
| RGD1561500_f        | 259        | 171        | <b>0.66</b>  | BM390695        | similar to hypothetical protein FLJ14800 (predicted)      |
| RGD1561597_f        | 56         | 174        | <b>3.13</b>  | BE118049        | similar to mKIAA0518 protein (predicted)                  |
| RGD1561653_f        | 60         | 706        | <b>11.79</b> | AI059295        | similar to HECT domain containing 1 (predicted)           |
| RGD1562123_f        | 100        | 247        | <b>2.47</b>  | BE117893        | similar to hypothetical protein (predicted)               |
| RGD1562407_f        | 93         | 193        | <b>2.07</b>  | BG665671        | similar to WAC (predicted)                                |
| RGD1563072_f        | 126        | 237        | <b>1.88</b>  | BI290787        | similar to hypothetical protein FLJ38984 (predicted)      |
| RGD1563612_f        | 174        | 344        | <b>1.98</b>  | BE108162        | similar to testymin (predicted)                           |
| RGD1563838_f        | 34         | 77         | <b>2.29</b>  | BG665533        | similar to leucine zipper protein 2 (predicted)           |
| RGD1563977_f        | 113        | 69         | <b>0.61</b>  | AI145746        | Similar to protein 4.1G (predicted)                       |
| RGD1564625_f        | 87         | 139        | <b>1.61</b>  | BF397371        | similar to transmembrane protein TM9SF3 (predicted)       |
| RGD1564852_f        | 73         | 119        | <b>1.63</b>  | AI575906        | similar to hypothetical protein FLJ14503 (predicted)      |
| RGD1564943_f        | 96         | 243        | <b>2.52</b>  | BE118876        | similar to 4930429A08Rik protein (predicted)              |
| RGD1564964_f        | 18         | 266        | <b>15.04</b> | BE116698        | similar to WD repeat domain 11 protein (predicted)        |
| RGD1564983_f        | 29         | 77         | <b>2.67</b>  | BE107672        | similar to leucine rich repeat containing 10 (predicted)  |
| RGD1565095_f        | 82         | 669        | <b>8.14</b>  | AA893212        | Similar to hypothetical protein MGC52110 (predicted)      |
| RGD1565267_f        | 48         | 147        | <b>3.07</b>  | BM387829        | similar to PS1D protein (predicted)                       |
| RGD1565556_f        | 374        | 1171       | <b>3.13</b>  | AI409823        | similar to cajalin 2 isoform a (predicted)                |
| RGD1565602_f        | 76         | 182        | <b>2.38</b>  | BM383996        | similar to PLU1 (predicted)                               |
| RGD1566064_f        | 69         | 282        | <b>4.08</b>  | BI289641        | similar to KIAA1096 protein (predicted)                   |
| RGD1566117_f        | 135        | 928        | <b>6.87</b>  | AI555865        | similar to hypothetical protein FLJ23033 (predicted)      |
| RGD1566201_f        | 38         | 150        | <b>3.96</b>  | BE118739        | similar to mKIAA0960 protein (predicted)                  |
| Rtn4                | 68         | 505        | <b>7.48</b>  | AF051335        | reticulon 4                                               |
| Scoc                | 223        | 399        | <b>1.79</b>  | AI029749        | short coiled-coil protein                                 |
| Sel1h               | 36         | 86         | <b>2.38</b>  | BI285936        | Sel1 (suppressor of lin-12) 1 homolog (C. elegans)        |
| Sgta                | 113        | 202        | <b>1.79</b>  | NM_022703       | small glutamine-rich tetratricopeptide repeat (TPR)-con   |
| Slitrk1_predicte    | 41         | 94         | <b>2.29</b>  | AW523107        | SLIT and NTRK-like family, member 1 (predicted)           |
| Slitrk3_predicte    | 35         | 105        | <b>2.96</b>  | AA819827        | SLIT and NTRK-like family, member 3 (predicted)           |
| Svop                | 143        | 255        | <b>1.79</b>  | NM_134404       | SV2 related protein                                       |
| Tmem16c_pred        | 25         | 98         | <b>3.98</b>  | AI144648        | transmembrane protein 16C (predicted)                     |
| <b>Tmem24</b>       | <b>537</b> | <b>295</b> | <b>0.55</b>  | <b>BG378195</b> | <b>transmembrane protein 24</b>                           |
| Trim23              | 79         | 126        | <b>1.60</b>  | L04760          | tripartite motif protein 23                               |
| Ttc3_predicted      | 242        | 989        | <b>4.08</b>  | BF388771        | tetratricopeptide repeat domain 3 (predicted)             |
| Ttc9c               | 75         | 139        | <b>1.86</b>  | BG668930        | Tetratricopeptide repeat domain 9C                        |
| Ttyh1_predictec     | 1113       | 2975       | <b>2.67</b>  | AI412746        | wee1 homolog 1 (Drosophila) (predicted)                   |
| Wdr37_predicte      | 105        | 712        | <b>6.77</b>  | BG662814        | WD repeat domain 37 (predicted)                           |
| Wdr48_predicte      | 82         | 134        | <b>1.63</b>  | BE101118        | WD repeat domain 48 (predicted)                           |
| Wdr59               | 81         | 135        | <b>1.66</b>  | AW527783        | WD repeat domain 59                                       |

#### EST's

| Sample        | F3-Cont | F3-Vinc | Vin/Con     | Genbank  | Gene Title                                             |
|---------------|---------|---------|-------------|----------|--------------------------------------------------------|
| Gene Symbol   | Raw     | Raw     | Ratio       | Genbank  | Gene Title                                             |
| ---           | 180     | 667     | <b>3.71</b> | BF406608 | Transcribed locus, strongly similar to XP_223397.3 sin |
| ---           | 12      | 84      | <b>7.08</b> | BE109363 | Transcribed locus, strongly similar to XP_579796.1 hy  |
| Fam31b_predic | 24      | 134     | <b>5.57</b> | BM385853 | Family with sequence similarity 31, member B (predicte |
| LOC366300     | 598     | 1122    | <b>1.88</b> | AI170706 | hypothetical LOC366300                                 |

|                     |           |            |              |                 |                                                           |
|---------------------|-----------|------------|--------------|-----------------|-----------------------------------------------------------|
| LOC682182 /// I     | 51        | 77         | <b>1.52</b>  | BE095833        | similar to RIKEN cDNA 1110067D22 (predicted) /// simi     |
| RGD1304711_f        | 354       | 222        | <b>0.63</b>  | AW526713        | Similar to RIKEN cDNA 4921521J11 (predicted)              |
| RGD1305387          | 76        | 120        | <b>1.58</b>  | BI288527        | similar to RIKEN cDNA 2610207116                          |
| RGD1305492_f        | 48        | 96         | <b>2.01</b>  | BG670905        | similar to RIKEN cDNA 1700034P14 (predicted)              |
| RGD1305671_f        | 29        | 186        | <b>6.46</b>  | BE116226        | Similar to expressed sequence AI317237 (predicted)        |
| <b>RGD1305755</b>   | <b>51</b> | <b>285</b> | <b>5.62</b>  | <b>AI179665</b> | <b>Similar to RIKEN cDNA 5033406L14</b>                   |
| RGD1305903_f        | 31        | 125        | <b>4.05</b>  | AI556398        | similar to RIKEN cDNA G630024C07 gene (predicted)         |
| RGD1306053          | 49        | 91         | <b>1.85</b>  | BF392629        | similar to RIKEN cDNA 1200016B17                          |
| RGD1306067          | 61        | 243        | <b>4.00</b>  | AW141642        | similar to chromosome 20 open reading frame 6             |
| RGD1306284          | 273       | 180        | <b>0.66</b>  | AA866227        | similar to RIKEN cDNA 1110005A03                          |
| RGD1306739_f        | 135       | 83         | <b>0.61</b>  | AI171288        | similar to RIKEN cDNA 1700040L02 (predicted)              |
| RGD1306873          | 33        | 137        | <b>4.16</b>  | AI177725        | similar to RIKEN cDNA 2210010N04 gene                     |
| RGD1308290_f        | 53        | 96         | <b>1.81</b>  | AA894335        | similar to RIKEN cDNA 5730454B08 (predicted)              |
| RGD1309104_f        | 116       | 395        | <b>3.40</b>  | BF388757        | similar to RIKEN cDNA 1700025G04 gene (predicted)         |
| RGD1309385_f        | 39        | 238        | <b>6.14</b>  | BG372587        | similar to RIKEN cDNA E030034P13 (predicted)              |
| RGD1310127          | 139       | 88         | <b>0.64</b>  | AA894060        | similar to cDNA sequence BC017158                         |
| RGD1310351_f        | 47        | 238        | <b>5.04</b>  | BI296537        | similar to RIKEN cDNA 4732418C07 (predicted)              |
| RGD1311686          | 223       | 347        | <b>1.56</b>  | BI294949        | similar to chromosome 16 open reading frame 5             |
| RGD1310722_f        | 42        | 690        | <b>16.34</b> | AW534218        | similar to RIKEN cDNA D130059P03 gene (predicted)         |
| RGD1311086          | 221       | 146        | <b>0.66</b>  | BI288424        | similar to RIKEN cDNA 2610029K21                          |
| RGD1311456_f        | 55        | 266        | <b>4.83</b>  | AI045965        | similar to RIKEN cDNA B230380D07 (predicted)              |
| RGD1311783_f        | 265       | 469        | <b>1.77</b>  | BG668881        | similar to RIKEN cDNA 2010012O05 (predicted)              |
| <i>RGD1311835</i>   | <i>81</i> | <i>136</i> | <i>1.69</i>  | <i>BI284801</i> | <i>similar to RIKEN cDNA 1110021N07</i>                   |
| <b>RGD1359529</b>   | <b>67</b> | <b>166</b> | <b>2.48</b>  | <b>BE096504</b> | <b>similar to chromosome 1 open reading frame 63</b>      |
| RGD1359691          | 137       | 48         | <b>0.35</b>  | BF398271        | hypothetical LOC287534                                    |
| RGD1559896_f        | 31        | 85         | <b>2.77</b>  | AW253651        | similar to RIKEN cDNA 2310022B05 (predicted)              |
| RGD1560479_f        | 23        | 211        | <b>9.24</b>  | BF394331        | similar to RIKEN cDNA 5330439J01 (predicted)              |
| <i>RGD1560913_f</i> | <i>5</i>  | <i>164</i> | <b>30.87</b> | <i>AA799328</i> | <i>similar to expressed sequence AW413625 (predicted)</i> |
| RGD1560957_f        | 137       | 85         | <b>0.62</b>  | BE119096        | similar to RIKEN cDNA 5730466H23 (predicted)              |
| RGD1562563_f        | 150       | 283        | <b>1.89</b>  | BE116089        | Similar to RIKEN cDNA G430041M01 (predicted)              |
| RGD1562618_f        | 74        | 136        | <b>1.85</b>  | BG381652        | similar to RIKEN cDNA 6030419C18 gene (predicted)         |
| RGD1563001_f        | 70        | 343        | <b>4.90</b>  | BI304125        | similar to RIKEN cDNA 2010106G01 (predicted)              |
| RGD1563441_f        | 28        | 77         | <b>2.74</b>  | BF406306        | similar to RIKEN cDNA A030009H04 (predicted)              |
| RGD1563912_f        | 441       | 868        | <b>1.97</b>  | BI282028        | RGD1563912 (predicted)                                    |
| RGD1564227_f        | 39        | 158        | <b>4.06</b>  | BI296242        | similar to RIKEN cDNA 5730557B15 (predicted)              |
| RGD1564379_f        | 66        | 100        | <b>1.52</b>  | BF284939        | RGD1564379 (predicted)                                    |
| RGD1564778_f        | 131       | 259        | <b>1.97</b>  | AI168933        | similar to RIKEN cDNA 4121402D02 (predicted)              |
| RGD1564957_f        | 36        | 138        | <b>3.89</b>  | BF387898        | similar to RIKEN cDNA 3110007P09 (predicted)              |
| RGD1565957_f        | 514       | 325        | <b>0.63</b>  | BI294688        | similar to RIKEN cDNA 1110061N23 (predicted)              |
| ---                 | 200       | 126        | <b>0.63</b>  | AF023090        | Transcribed locus                                         |
| ---                 | 131       | 885        | <b>6.75</b>  | BF398122        | Transcribed locus                                         |
| ---                 | 31        | 76         | <b>2.48</b>  | AI029767        | Transcribed locus                                         |
| ---                 | 66        | 125        | <b>1.91</b>  | AA956307        | Transcribed locus                                         |
| ---                 | 25        | 84         | <b>3.35</b>  | BF398673        | Transcribed locus                                         |
| ---                 | 9         | 115        | <b>13.55</b> | BE117514        | Transcribed locus                                         |
| ---                 | 189       | 120        | <b>0.63</b>  | AI146156        | Transcribed locus                                         |
| ---                 | 954       | 583        | <b>0.61</b>  | BM389272        | Transcribed locus                                         |
| ---                 | 252       | 469        | <b>1.86</b>  | BF420311        | Transcribed locus                                         |
| ---                 | 327       | 892        | <b>2.72</b>  | BM384203        | Transcribed locus                                         |
| ---                 | 43        | 232        | <b>5.43</b>  | BF394499        | Transcribed locus                                         |
| ---                 | 17        | 90         | <b>5.26</b>  | BF403330        | Transcribed locus                                         |
| ---                 | 87        | 51         | <b>0.59</b>  | BE106592        | Transcribed locus                                         |
| ---                 | 88        | 177        | <b>2.01</b>  | H34328          | Transcribed locus                                         |
| ---                 | 45        | 220        | <b>4.93</b>  | BG668689        | Transcribed locus                                         |
| ---                 | 44        | 167        | <b>3.79</b>  | BF394561        | Transcribed locus                                         |
| ---                 | 81        | 36         | <b>0.44</b>  | BI300158        | Transcribed locus                                         |
| ---                 | 205       | 1136       | <b>5.56</b>  | BF546710        | Transcribed locus                                         |
| ---                 | 70        | 183        | <b>2.60</b>  | BF522208        | Transcribed locus                                         |
| ---                 | 32        | 109        | <b>3.38</b>  | AA848370        | Transcribed locus                                         |
| ---                 | 217       | 135        | <b>0.62</b>  | BF390904        | Transcribed locus                                         |
| ---                 | 122       | 77         | <b>0.64</b>  | AW524239        | Transcribed locus                                         |
| ---                 | 79        | 156        | <b>1.98</b>  | BE119960        | Transcribed locus                                         |
| ---                 | 106       | 64         | <b>0.60</b>  | BF415784        | Transcribed locus                                         |
| ---                 | 54        | 247        | <b>4.59</b>  | BF404490        | Transcribed locus                                         |
| ---                 | 32        | 187        | <b>5.85</b>  | BF404446        | Transcribed locus                                         |
| ---                 | 335       | 200        | <b>0.60</b>  | BF391580        | Transcribed locus                                         |
| ---                 | 41        | 90         | <b>2.21</b>  | BF405168        | Transcribed locus                                         |
| ---                 | 83        | 258        | <b>3.11</b>  | BF393011        | Transcribed locus                                         |
| ---                 | 206       | 93         | <b>0.45</b>  | BE120509        | Transcribed locus                                         |

|     |           |           |              |                 |                          |
|-----|-----------|-----------|--------------|-----------------|--------------------------|
| --- | 313       | 204       | <b>0.65</b>  | AW521804        | Transcribed locus        |
| --- | 73        | 113       | <b>1.54</b>  | BF411608        | Transcribed locus        |
| --- | 145       | 289       | <b>1.99</b>  | AW526127        | Transcribed locus        |
| --- | 48        | 247       | <b>5.16</b>  | AW529817        | Transcribed locus        |
| --- | 26        | 76        | <b>2.93</b>  | BM958510        | Transcribed locus        |
| --- | 27        | 81        | <b>2.97</b>  | BF396580        | Transcribed locus        |
| --- | <b>11</b> | <b>78</b> | <b>6.85</b>  | <b>BE105421</b> | <b>Transcribed locus</b> |
| --- | 45        | 83        | <b>1.83</b>  | AI113308        | Transcribed locus        |
| --- | 263       | 476       | <b>1.81</b>  | BE098012        | Transcribed locus        |
| --- | 600       | 314       | <b>0.52</b>  | H34760          | Transcribed locus        |
| --- | 43        | 252       | <b>5.82</b>  | <i>BF545930</i> | <i>Transcribed locus</i> |
| --- | 23        | 153       | <b>6.80</b>  | BF548061        | Transcribed locus        |
| --- | 1301      | 856       | <b>0.66</b>  | BE099398        | Transcribed locus        |
| --- | 106       | 42        | <b>0.40</b>  | AW920217        | Transcribed locus        |
| --- | 38        | 81        | <b>2.14</b>  | BF291053        | Transcribed locus        |
| --- | 1181      | 1892      | <b>1.60</b>  | BF544005        | Transcribed locus        |
| --- | 110       | 271       | <b>2.47</b>  | AW522341        | Transcribed locus        |
| --- | 360       | 574       | <b>1.59</b>  | BF390608        | Transcribed locus        |
| --- | 66        | 141       | <b>2.15</b>  | AI102173        | Transcribed locus        |
| --- | 26        | 105       | <b>4.00</b>  | AW531516        | Transcribed locus        |
| --- | 32        | 86        | <b>2.70</b>  | AI044545        | Transcribed locus        |
| --- | 36        | 94        | <b>2.63</b>  | AI601993        | Transcribed locus        |
| --- | 254       | 149       | <b>0.59</b>  | BE096857        | Transcribed locus        |
| --- | 388       | 225       | <b>0.58</b>  | BG380768        | Transcribed locus        |
| --- | 112       | 297       | <b>2.65</b>  | AW523015        | Transcribed locus        |
| --- | 196       | 311       | <b>1.59</b>  | AW529108        | Transcribed locus        |
| --- | 955       | 608       | <b>0.64</b>  | BG668719        | Transcribed locus        |
| --- | 62        | 108       | <b>1.73</b>  | H31734          | Transcribed locus        |
| --- | 34        | 691       | <b>20.25</b> | AI145951        | Transcribed locus        |
| --- | 173       | 115       | <b>0.66</b>  | AW529067        | Transcribed locus        |
| --- | 71        | 127       | <b>1.80</b>  | AI575856        | Transcribed locus        |
| --- | 74        | 196       | <b>2.65</b>  | AI412813        | Transcribed locus        |
| --- | 53        | 142       | <b>2.68</b>  | BG664080        | Transcribed locus        |
| --- | 127       | 265       | <b>2.08</b>  | AI575519        | Transcribed locus        |
| --- | 113       | 300       | <b>2.66</b>  | AA956982        | Transcribed locus        |
| --- | 7         | 172       | <b>26.30</b> | AI030231        | Transcribed locus        |
| --- | 328       | 188       | <b>0.57</b>  | AI071202        | Transcribed locus        |
| --- | 89        | 35        | <b>0.39</b>  | BF392359        | Transcribed locus        |
| --- | 8         | 197       | <b>23.43</b> | BF400601        | Transcribed locus        |
| --- | 33        | 336       | <b>10.30</b> | BE120522        | Transcribed locus        |
| --- | 42        | 81        | <b>1.92</b>  | AA956085        | Transcribed locus        |
| --- | 23        | 136       | <b>5.82</b>  | BI303858        | Transcribed locus        |
| --- | 192       | 86        | <b>0.45</b>  | BE106361        | Transcribed locus        |
| --- | 64        | 331       | <b>5.16</b>  | BF549454        | Transcribed locus        |
| --- | 13        | 112       | <b>8.85</b>  | BE096515        | Transcribed locus        |
| --- | 12        | 79        | <b>6.83</b>  | BE111692        | Transcribed locus        |
| --- | 153       | 361       | <b>2.36</b>  | AI556642        | Transcribed locus        |
| --- | 26        | 124       | <b>4.76</b>  | BI295733        | Transcribed locus        |
| --- | 84        | 143       | <b>1.71</b>  | AA850595        | Transcribed locus        |
| --- | 79        | 161       | <b>2.05</b>  | BF406435        | Transcribed locus        |
| --- | 29        | 139       | <b>4.79</b>  | AA956757        | Transcribed locus        |
| --- | 82        | 287       | <b>3.51</b>  | BM391661        | Transcribed locus        |
| --- | 135       | 343       | <b>2.54</b>  | BI296013        | Transcribed locus        |
| --- | 135       | 89        | <b>0.66</b>  | AI227988        | Transcribed locus        |
| --- | 75        | 46        | <b>0.61</b>  | BI280337        | Transcribed locus        |
| --- | 30        | 93        | <b>3.12</b>  | BE096618        | Transcribed locus        |
| --- | 200       | 122       | <b>0.61</b>  | BF389889        | Transcribed locus        |
| --- | 54        | 115       | <b>2.14</b>  | BI291162        | Transcribed locus        |
| --- | 59        | 118       | <b>2.00</b>  | AI043817        | Transcribed locus        |
| --- | 173       | 84        | <b>0.48</b>  | <i>BF399309</i> | <i>Transcribed locus</i> |
| --- | 81        | 54        | <b>0.66</b>  | BF405616        | Transcribed locus        |
| --- | 20        | 107       | <b>5.45</b>  | BI294889        | Transcribed locus        |
| --- | 23        | 80        | <b>3.53</b>  | BE107619        | Transcribed locus        |
| --- | 89        | 170       | <b>1.91</b>  | BF419818        | Transcribed locus        |
| --- | 34        | 354       | <b>10.29</b> | BI300794        | Transcribed locus        |
| --- | 183       | 113       | <b>0.62</b>  | BF283381        | Transcribed locus        |
| --- | 131       | 228       | <b>1.74</b>  | AI231225        | Transcribed locus        |
| --- | 78        | 41        | <b>0.53</b>  | <i>BF391128</i> | <i>Transcribed locus</i> |
| --- | 34        | 92        | <b>2.74</b>  | BI295124        | Transcribed locus        |



|     |            |            |              |                 |                                 |
|-----|------------|------------|--------------|-----------------|---------------------------------|
| --- | 70         | 253        | <b>3.62</b>  | AA899937        | <i>Transcribed locus</i>        |
| --- | 186        | 287        | <b>1.55</b>  | BF393945        | Transcribed locus               |
| --- | 253        | 161        | <b>0.64</b>  | BE107167        | Transcribed locus               |
| --- | 62         | 96         | <b>1.53</b>  | AI232217        | Transcribed locus               |
| --- | 84         | 55         | <b>0.66</b>  | BF283404        | Transcribed locus               |
| --- | 302        | 171        | <b>0.57</b>  | AI229933        | Transcribed locus               |
| --- | 273        | 144        | <b>0.53</b>  | AW915115        | Transcribed locus               |
| --- | 15         | 134        | <b>8.86</b>  | BF406304        | <i>Transcribed locus</i>        |
| --- | <b>112</b> | <b>322</b> | <b>2.88</b>  | <b>AA944136</b> | <b><i>Transcribed locus</i></b> |
| --- | 166        | 105        | <b>0.63</b>  | BF562962        | Transcribed locus               |
| --- | 257        | 603        | <b>2.35</b>  | BF546770        | Transcribed locus               |
| --- | 348        | 198        | <b>0.57</b>  | BF284027        | Transcribed locus               |
| --- | 144        | 314        | <b>2.18</b>  | AI229321        | Transcribed locus               |
| --- | 15         | 90         | <b>6.07</b>  | H31285          | Transcribed locus               |
| --- | 176        | 315        | <b>1.79</b>  | AA874903        | Transcribed locus               |
| --- | 59         | 188        | <b>3.21</b>  | BE100612        | Transcribed locus               |
| --- | 204        | 129        | <b>0.63</b>  | AI146262        | Transcribed locus               |
| --- | 55         | 121        | <b>2.19</b>  | BF416395        | Transcribed locus               |
| --- | 127        | 61         | <b>0.48</b>  | AA817920        | Transcribed locus               |
| --- | 3          | 122        | <b>40.67</b> | BG668477        | Transcribed locus               |
| --- | 81         | 135        | <b>1.66</b>  | AI072068        | Transcribed locus               |
| --- | 55         | 178        | <b>3.25</b>  | AW532389        | Transcribed locus               |
| --- | 51         | 253        | <b>4.95</b>  | BF409092        | Transcribed locus               |
| --- | 38         | 81         | <b>2.14</b>  | AA997253        | Transcribed locus               |
| --- | 21         | 81         | <b>3.87</b>  | BE096277        | Transcribed locus               |
| --- | 48         | 93         | <b>1.94</b>  | BE120904        | Transcribed locus               |
| --- | 159        | 597        | <b>3.75</b>  | AA925373        | Transcribed locus               |
| --- | 36         | 145        | <b>3.99</b>  | BM390588        | Transcribed locus               |
| --- | 28         | 106        | <b>3.77</b>  | AI229409        | Transcribed locus               |
| --- | 250        | 156        | <b>0.62</b>  | BE108597        | Transcribed locus               |
| --- | 92         | 147        | <b>1.59</b>  | BF559356        | Transcribed locus               |
| --- | 115        | 1006       | <b>8.77</b>  | BE109132        | Transcribed locus               |
| --- | 170        | 292        | <b>1.72</b>  | BG667918        | Transcribed locus               |
| --- | 74         | 133        | <b>1.80</b>  | BG671630        | Transcribed locus               |
| --- | 79         | 158        | <b>1.99</b>  | BF555825        | Transcribed locus               |
| --- | 140        | 89         | <b>0.64</b>  | AI072798        | Transcribed locus               |
| --- | <b>85</b>  | <b>213</b> | <b>2.50</b>  | <b>AA925807</b> | <b><i>Transcribed locus</i></b> |
| --- | 20         | 156        | <b>7.90</b>  | AI071698        | Transcribed locus               |
| --- | 90         | 47         | <b>0.53</b>  | BG665568        | Transcribed locus               |
| --- | 544        | 352        | <b>0.65</b>  | AI230360        | Transcribed locus               |
| --- | <b>190</b> | <b>76</b>  | <b>0.40</b>  | <b>AI102821</b> | <b><i>Transcribed locus</i></b> |
| --- | 175        | 111        | <b>0.64</b>  | AA926109        | <i>Transcribed locus</i>        |
| --- | 556        | 1131       | <b>2.03</b>  | BM958512        | Transcribed locus               |
| --- | 117        | 191        | <b>1.63</b>  | AW921244        | Transcribed locus               |
| --- | 38         | 348        | <b>9.25</b>  | BI281615        | Transcribed locus               |
| --- | 206        | 865        | <b>4.19</b>  | BG372598        | Transcribed locus               |
| --- | 339        | 219        | <b>0.65</b>  | BF563716        | Transcribed locus               |
| --- | 868        | 1987       | <b>2.29</b>  | BF555795        | Transcribed locus               |
| --- | 80         | 52         | <b>0.65</b>  | AW523077        | Transcribed locus               |
| --- | 90         | 375        | <b>4.16</b>  | BE108047        | Transcribed locus               |
| --- | 87         | 141        | <b>1.63</b>  | AI237079        | Transcribed locus               |
| --- | 232        | 361        | <b>1.55</b>  | AI176342        | Transcribed locus               |
| --- | 46         | 100        | <b>2.17</b>  | AA859319        | <i>Transcribed locus</i>        |
| --- | 74         | 212        | <b>2.86</b>  | BE120748        | Transcribed locus               |
| --- | 107        | 603        | <b>5.66</b>  | BE105050        | Transcribed locus               |
| --- | 155        | 83         | <b>0.54</b>  | AA875457        | Transcribed locus               |
| --- | 55         | 260        | <b>4.77</b>  | AI717668        | Transcribed locus               |
| --- | 110        | 59         | <b>0.54</b>  | AI070489        | <i>Transcribed locus</i>        |
| --- | 843        | 1377       | <b>1.63</b>  | BF285731        | Transcribed locus               |
| --- | 162        | 92         | <b>0.57</b>  | BI280114        | Transcribed locus               |
| --- | 171        | 91         | <b>0.53</b>  | BE105488        | Transcribed locus               |
| --- | 70         | 124        | <b>1.78</b>  | BE110067        | <i>Transcribed locus</i>        |
| --- | 372        | 764        | <b>2.05</b>  | AW530378        | Transcribed locus               |
| --- | 47         | 115        | <b>2.45</b>  | BE121056        | Transcribed locus               |
| --- | 26         | 189        | <b>7.40</b>  | AI555166        | Transcribed locus               |
| --- | 28         | 97         | <b>3.51</b>  | AI060117        | Transcribed locus               |
| --- | 15         | 83         | <b>5.37</b>  | AI145015        | <i>Transcribed locus</i>        |
| --- | 120        | 315        | <b>2.63</b>  | AA819045        | Transcribed locus               |
| --- | 60         | 170        | <b>2.86</b>  | AW524106        | Transcribed locus               |

|     |            |             |              |                 |                          |
|-----|------------|-------------|--------------|-----------------|--------------------------|
| --- | 305        | 144         | <b>0.47</b>  | BF409213        | Transcribed locus        |
| --- | 16         | 392         | <b>24.17</b> | BE108751        | Transcribed locus        |
| --- | 74         | 322         | <b>4.37</b>  | BE114458        | Transcribed locus        |
| --- | 31         | 94          | <b>3.02</b>  | BF391155        | Transcribed locus        |
| --- | 12         | 146         | <b>12.61</b> | AW534519        | Transcribed locus        |
| --- | 47         | 96          | <b>2.04</b>  | AW534466        | Transcribed locus        |
| --- | 94         | 728         | <b>7.72</b>  | AI145433        | Transcribed locus        |
| --- | 18         | 87          | <b>4.84</b>  | BF416420        | Transcribed locus        |
| --- | 28         | 94          | <b>3.38</b>  | BF390757        | Transcribed locus        |
| --- | 81         | 132         | <b>1.63</b>  | AI406475        | Transcribed locus        |
| --- | 8          | 148         | <b>18.44</b> | AW530527        | Transcribed locus        |
| --- | 19         | 138         | <b>7.30</b>  | BM386352        | Transcribed locus        |
| --- | 63         | 130         | <b>2.08</b>  | AI103408        | Transcribed locus        |
| --- | <b>68</b>  | <b>1546</b> | <b>22.67</b> | <b>AI555855</b> | <b>Transcribed locus</b> |
| --- | 551        | 335         | <b>0.61</b>  | H31701          | Transcribed locus        |
| --- | 97         | 203         | <b>2.09</b>  | AI229240        | Transcribed locus        |
| --- | 10         | 198         | <b>19.54</b> | BF402498        | Transcribed locus        |
| --- | 84         | 55          | <b>0.65</b>  | AI058315        | Transcribed locus        |
| --- | 81         | 146         | <b>1.79</b>  | BE102139        | Transcribed locus        |
| --- | 84         | 53          | <b>0.63</b>  | AI137306        | Transcribed locus        |
| --- | 150        | 243         | <b>1.62</b>  | BM386302        | Transcribed locus        |
| --- | 158        | 430         | <b>2.72</b>  | AI535567        | Transcribed locus        |
| --- | 96         | 413         | <b>4.29</b>  | BF420785        | Transcribed locus        |
| --- | 123        | 193         | <b>1.57</b>  | AI011930        | Transcribed locus        |
| --- | 38         | 78          | <b>2.06</b>  | AI233902        | Transcribed locus        |
| --- | 34         | 81          | <b>2.40</b>  | BI288184        | Transcribed locus        |
| --- | 79         | 163         | <b>2.07</b>  | BM383595        | Transcribed locus        |
| --- | 28         | 108         | <b>3.91</b>  | BF392753        | Transcribed locus        |
| --- | 79         | 167         | <b>2.11</b>  | BE108208        | Transcribed locus        |
| --- | 86         | 140         | <b>1.63</b>  | AI717163        | Transcribed locus        |
| --- | 204        | 355         | <b>1.74</b>  | AW534671        | Transcribed locus        |
| --- | 37         | 170         | <b>4.55</b>  | BF397054        | Transcribed locus        |
| --- | 41         | 120         | <b>2.92</b>  | AA900904        | Transcribed locus        |
| --- | 61         | 164         | <b>2.71</b>  | AA818967        | Transcribed locus        |
| --- | 45         | 119         | <b>2.64</b>  | BF407470        | Transcribed locus        |
| --- | 85         | 134         | <b>1.57</b>  | BE107074        | Transcribed locus        |
| --- | 146        | 234         | <b>1.60</b>  | AI179450        | Transcribed locus        |
| --- | 7          | 79          | <b>10.61</b> | BG379394        | Transcribed locus        |
| --- | 190        | 330         | <b>1.74</b>  | BF411826        | Transcribed locus        |
| --- | 116        | 1031        | <b>8.89</b>  | AI511069        | Transcribed locus        |
| --- | 48         | 434         | <b>9.05</b>  | AW252020        | Transcribed locus        |
| --- | 195        | 129         | <b>0.66</b>  | BI276118        | Transcribed locus        |
| --- | <b>263</b> | <b>706</b>  | <b>2.69</b>  | <b>AI112113</b> | <b>Transcribed locus</b> |
| --- | 73         | 161         | <b>2.21</b>  | AW531387        | Transcribed locus        |
| --- | 55         | 139         | <b>2.51</b>  | BF399121        | Transcribed locus        |
| --- | 21         | 110         | <b>5.16</b>  | BF284914        | Transcribed locus        |
| --- | 657        | 1034        | <b>1.57</b>  | BI292687        | Transcribed locus        |
| --- | 43         | 86          | <b>2.01</b>  | AA859337        | Transcribed locus        |
| --- | 465        | 1380        | <b>2.97</b>  | AW535380        | Transcribed locus        |
| --- | 96         | 157         | <b>1.64</b>  | BE106526        | Transcribed locus        |
| --- | 46         | 78          | <b>1.68</b>  | BF548480        | Transcribed locus        |
| --- | 84         | 51          | <b>0.60</b>  | BI291457        | Transcribed locus        |
| --- | 103        | 62          | <b>0.60</b>  | BF418563        | Transcribed locus        |
| --- | 51         | 94          | <b>1.86</b>  | BE099568        | Transcribed locus        |
| --- | 204        | 344         | <b>1.69</b>  | BI295869        | Transcribed locus        |
| --- | 470        | 1446        | <b>3.08</b>  | AI170377        | Transcribed locus        |
| --- | 140        | 330         | <b>2.37</b>  | BM386385        | Transcribed locus        |
| --- | 136        | 241         | <b>1.77</b>  | BF412303        | Transcribed locus        |
| --- | 53         | 589         | <b>11.20</b> | AW532489        | Transcribed locus        |
| --- | 87         | 232         | <b>2.66</b>  | BF283340        | Transcribed locus        |
| --- | 113        | 333         | <b>2.96</b>  | BF550404        | Transcribed locus        |
| --- | 163        | 92          | <b>0.57</b>  | BF416276        | Transcribed locus        |
| --- | 40         | 85          | <b>2.14</b>  | BG378933        | Transcribed locus        |
| --- | 116        | 281         | <b>2.42</b>  | AA955579        | Transcribed locus        |
| --- | 21         | 96          | <b>4.67</b>  | BF396151        | Transcribed locus        |
| --- | 622        | 406         | <b>0.65</b>  | BG378070        | Transcribed locus        |
| --- | 100        | 66          | <b>0.66</b>  | BI286851        | Transcribed locus        |
| --- | 51         | 117         | <b>2.29</b>  | BE108174        | Transcribed locus        |
| --- | 25         | 112         | <b>4.59</b>  | BE108246        | Transcribed locus        |

|     |            |            |              |                 |                                                       |
|-----|------------|------------|--------------|-----------------|-------------------------------------------------------|
| --- | 288        | 153        | <b>0.53</b>  | AW143156        | Transcribed locus                                     |
| --- | 66         | 129        | <b>1.96</b>  | AI101372        | Transcribed locus                                     |
| --- | 194        | 359        | <b>1.86</b>  | BF415701        | Transcribed locus                                     |
| --- | 315        | 190        | <b>0.60</b>  | BI282767        | Transcribed locus                                     |
| --- | 23         | 200        | <b>8.64</b>  | BF402633        | Transcribed locus                                     |
| --- | 56         | 221        | <b>3.98</b>  | BE109509        | Transcribed locus                                     |
| --- | 23         | 168        | <b>7.45</b>  | AI385171        | Transcribed locus                                     |
| --- | 77         | 371        | <b>4.81</b>  | BF408438        | Transcribed locus                                     |
| --- | 63         | 382        | <b>6.06</b>  | BM389190        | Transcribed locus                                     |
| --- | 24         | 90         | <b>3.72</b>  | BG372400        | Transcribed locus                                     |
| --- | 40         | 98         | <b>2.44</b>  | AI101245        | Transcribed locus                                     |
| --- | 82         | 193        | <b>2.34</b>  | BE111820        | Transcribed locus                                     |
| --- | 264        | 141        | <b>0.53</b>  | AI407719        | Transcribed locus                                     |
| --- | 53         | 198        | <b>3.73</b>  | BF400811        | Transcribed locus                                     |
| --- | 333        | 517        | <b>1.55</b>  | BM384026        | Transcribed locus                                     |
| --- | 333        | 646        | <b>1.94</b>  | BM388843        | Transcribed locus                                     |
| --- | 75         | 251        | <b>3.34</b>  | BF400779        | Transcribed locus                                     |
| --- | 119        | 76         | <b>0.64</b>  | AI232806        | Transcribed locus                                     |
| --- | 30         | 1207       | <b>39.95</b> | AI228978        | Transcribed locus                                     |
| --- | 117        | 62         | <b>0.53</b>  | BG381647        | Transcribed locus                                     |
| --- | 202        | 135        | <b>0.67</b>  | AA859010        | Transcribed locus                                     |
| --- | 716        | 473        | <b>0.66</b>  | AI171776        | Transcribed locus                                     |
| --- | 212        | 607        | <b>2.87</b>  | BE109208        | Transcribed locus                                     |
| --- | 250        | 156        | <b>0.62</b>  | BM386212        | Transcribed locus                                     |
| --- | 206        | 129        | <b>0.63</b>  | AI598550        | Transcribed locus                                     |
| --- | 104        | 232        | <b>2.23</b>  | AA799420        | Transcribed locus                                     |
| --- | 111        | 70         | <b>0.63</b>  | BG373057        | Transcribed locus                                     |
| --- | <b>147</b> | <b>364</b> | <b>2.48</b>  | <b>AI103530</b> | <b>Transcribed locus</b>                              |
| --- | 57         | 342        | <b>5.95</b>  | AI555608        | Transcribed locus                                     |
| --- | 81         | 123        | <b>1.52</b>  | AW914907        | Transcribed locus                                     |
| --- | 122        | 193        | <b>1.58</b>  | BF544403        | Transcribed locus                                     |
| --- | 52         | 83         | <b>1.60</b>  | BF542239        | Transcribed locus                                     |
| --- | 375        | 206        | <b>0.55</b>  | BI303277        | Transcribed locus                                     |
| --- | 74         | 137        | <b>1.86</b>  | AW920828        | Transcribed locus                                     |
| --- | 67         | 115        | <b>1.71</b>  | AI407047        | Transcribed locus, moderately similar to XP_001144552 |
| --- | 70         | 171        | <b>2.46</b>  | BE104676        | Transcribed locus, strongly similar to NP_001029332.1 |
| --- | 693        | 405        | <b>0.58</b>  | AI454332        | Transcribed locus, strongly similar to XP_001081628.1 |
| --- | 281        | 498        | <b>1.77</b>  | BF390195        | CDNA clone IMAGE:7320582                              |
| --- | 51         | 135        | <b>2.68</b>  | BF562934        | CDNA clone IMAGE:7320582                              |
| --- | 77         | 962        | <b>12.45</b> | AI008409        | CDNA clone IMAGE:7321089                              |
| --- | 237        | 145        | <b>0.61</b>  | AI237047        | CDNA clone IMAGE:7365681                              |
| --- | 126        | 80         | <b>0.63</b>  | BF398091        | CDNA clone IMAGE:7374368                              |
| --- | 37         | 203        | <b>5.48</b>  | BE106331        | CDNA clone IMAGE:7461178                              |
| --- | 295        | 469        | <b>1.59</b>  | BI294768        | ---                                                   |
| --- | 381        | 161        | <b>0.42</b>  | BM384537        | ---                                                   |
| --- | 46         | 86         | <b>1.85</b>  | BF547596        | ---                                                   |
| --- | 55         | 99         | <b>1.79</b>  | AI547718        | ---                                                   |
| --- | 23         | 147        | <b>6.29</b>  | AI705744        | ---                                                   |
| --- | 195        | 370        | <b>1.90</b>  | H33235          | ---                                                   |
| --- | 120        | 390        | <b>3.24</b>  | AI103026        | ---                                                   |
| --- | 294        | 688        | <b>2.34</b>  | BE116953        | ---                                                   |
| --- | 162        | 258        | <b>1.59</b>  | BI282114        | ---                                                   |
| --- | 302        | 461        | <b>1.53</b>  | BI275155        | ---                                                   |
| --- | 74         | 271        | <b>3.67</b>  | AW527270        | ---                                                   |
| --- | 236        | 151        | <b>0.64</b>  | BM385286        | ---                                                   |
| --- | 109        | 283        | <b>2.60</b>  | BG372713        | ---                                                   |
| --- | 207        | 849        | <b>4.10</b>  | AA997406        | ---                                                   |
| --- | 248        | 493        | <b>1.99</b>  | BF400907        | ---                                                   |
| --- | 1710       | 3508       | <b>2.05</b>  | {_Rat_beta-ac   | ---                                                   |
| --- | 240        | 784        | <b>3.27</b>  | {_Rat_beta-ac   | ---                                                   |
| --- | 543        | 1920       | <b>3.54</b>  | _Rat_beta-ac    | ---                                                   |
| --- | 126        | 211        | <b>1.68</b>  | BF556405        | ---                                                   |
| --- | <b>49</b>  | <b>82</b>  | <b>1.67</b>  | <b>AI172311</b> | ---                                                   |
| --- | 2376       | 1570       | <b>0.66</b>  | AI145313        | ---                                                   |
| --- | 14         | 77         | <b>5.36</b>  | AI112375        | ---                                                   |
| --- | 94         | 61         | <b>0.65</b>  | AA858748        | ---                                                   |
| --- | 143        | 70         | <b>0.49</b>  | BF522861        | ---                                                   |
| --- | 382        | 181        | <b>0.47</b>  | BF545849        | ---                                                   |
| --- | 133        | 200        | <b>1.50</b>  | BE120211        | ---                                                   |

|     |            |           |              |                 |     |
|-----|------------|-----------|--------------|-----------------|-----|
| --- | 539        | 347       | <b>0.64</b>  | BG380279        | --- |
| --- | 51         | 1212      | <b>23.99</b> | AI103917        | --- |
| --- | 84         | 52        | <b>0.62</b>  | AI030449        | --- |
| --- | 102        | 712       | <b>6.97</b>  | AI101194        | --- |
| --- | 51         | 139       | <b>2.75</b>  | BI289762        | --- |
| --- | 1779       | 1185      | <b>0.67</b>  | BE115454        | --- |
| --- | 11         | 127       | <b>11.37</b> | BF398431        | --- |
| --- | 37         | 114       | <b>3.04</b>  | BG668744        | --- |
| --- | 66         | 100       | <b>1.51</b>  | BE097409        | --- |
| --- | 45         | 85        | <b>1.89</b>  | AW535011        | --- |
| --- | 42         | 167       | <b>4.02</b>  | AW527250        | --- |
| --- | 131        | 84        | <b>0.64</b>  | BE116860        | --- |
| --- | 51         | 153       | <b>2.98</b>  | BE119914        | --- |
| --- | 45         | 85        | <b>1.91</b>  | <i>BI288579</i> | --- |
| --- | 170        | 345       | <b>2.02</b>  | AW921158        | --- |
| --- | 100        | 152       | <b>1.53</b>  | BF396974        | --- |
| --- | 129        | 75        | <b>0.58</b>  | AA859524        | --- |
| --- | 177        | 96        | <b>0.54</b>  | BE117273        | --- |
| --- | 77         | 129       | <b>1.68</b>  | AI715113        | --- |
| --- | 246        | 152       | <b>0.62</b>  | BG373537        | --- |
| --- | 14         | 78        | <b>5.60</b>  | BF415798        | --- |
| --- | 53         | 158       | <b>2.97</b>  | BI293026        | --- |
| --- | 47         | 104       | <b>2.23</b>  | BF397998        | --- |
| --- | 50         | 80        | <b>1.60</b>  | BF400933        | --- |
| --- | 105        | 58        | <b>0.55</b>  | BI280367        | --- |
| --- | 131        | 271       | <b>2.06</b>  | BF544968        | --- |
| --- | 19         | 106       | <b>5.58</b>  | AA851046        | --- |
| --- | 22         | 283       | <b>12.82</b> | BF548081        | --- |
| --- | 403        | 249       | <b>0.62</b>  | BM383406        | --- |
| --- | 89         | 53        | <b>0.60</b>  | BG380561        | --- |
| --- | 573        | 1349      | <b>2.36</b>  | BE101133        | --- |
| --- | 131        | 86        | <b>0.66</b>  | AI574734        | --- |
| --- | 238        | 146       | <b>0.61</b>  | BE105500        | --- |
| --- | 27         | 95        | <b>3.48</b>  | BF386160        | --- |
| --- | 29         | 171       | <b>5.84</b>  | BE115821        | --- |
| --- | 160        | 106       | <b>0.66</b>  | BF413298        | --- |
| --- | 76         | 18        | <b>0.24</b>  | BE111542        | --- |
| --- | 35         | 134       | <b>3.82</b>  | AI501579        | --- |
| --- | <i>101</i> | <i>59</i> | <i>0.58</i>  | <i>BF410240</i> | --- |
| --- | 87         | 53        | <b>0.60</b>  | AI013683        | --- |
| --- | 178        | 277       | <b>1.56</b>  | BF397301        | --- |
| --- | 282        | 180       | <b>0.64</b>  | AI145935        | --- |
| --- | 88         | 43        | <b>0.49</b>  | BF419655        | --- |
| --- | 54         | 192       | <b>3.56</b>  | BF419406        | --- |
| --- | 28         | 76        | <b>2.73</b>  | BF390754        | --- |
| --- | <b>55</b>  | <b>97</b> | <b>1.76</b>  | <b>BF403869</b> | --- |
| --- | 107        | 950       | <b>8.92</b>  | AI575254        | --- |
| --- | 45         | 930       | <b>20.86</b> | AI710284        | --- |
| --- | 420        | 279       | <b>0.67</b>  | BF420262        | --- |
| --- | 670        | 433       | <b>0.65</b>  | BF403383        | --- |
| --- | 29         | 376       | <b>12.95</b> | AI045904        | --- |
| --- | 240        | 151       | <b>0.63</b>  | AI104117        | --- |
| --- | 29         | 97        | <b>3.37</b>  | AW920849        | --- |
| --- | 306        | 1144      | <b>3.74</b>  | BF567766        | --- |
| --- | 52         | 116       | <b>2.21</b>  | AA684862        | --- |
| --- | 18         | 112       | <b>6.11</b>  | AI059349        | --- |
| --- | 18         | 105       | <b>5.94</b>  | AI705744        | --- |
| --- | 17         | 81        | <b>4.74</b>  | BF559198        | --- |
| --- | 5          | 86        | <b>15.98</b> | AI234943        | --- |

**Note - The bolded genes are similar between male and female gene sets.  
The italic genes are similar within the same sex between amygdala and hippocampus.**
